# Supplementary material for: Biological and clinical correlates of the patient health questionnaire-9: exploratory cross-sectional analyses of the baseline health study
Source: PubMed Central journal article supplement — BMJ Open. 2022 Jan 4;12(1):e054741. doi: 10.1136/bmjopen-2021-054741 (PMC8728408; doi:10.1136/bmjopen-2021-054741), 2022-01-04

## SUPPLEMENTAL MATERIAL

|                                                                                         |    |
|-----------------------------------------------------------------------------------------|----|
| <b>eTable 1. Key Variables Included in Each LASSO Covariate Model</b>                   | 2  |
| <b>eTable 2. Additional Medical History: PHQ-9 Scores</b>                               | 3  |
| <b>eTable 3. Estimates of the Non-Zero Coefficients from LASSO Model 1</b>              | 5  |
| <b>eTable 4. Estimates of the Non-Zero Coefficients from LASSO Model 2</b>              | 6  |
| <b>eTable 5. Estimates of the Non-Zero Coefficients from LASSO Model 3</b>              | 7  |
| <b>eTable 6. Estimates of the Non-Zero Coefficients from LASSO Model 4</b>              | 9  |
| <b>eTable 7. Estimates of the Non-Zero Coefficients from LASSO Model 5</b>              | 11 |
| <b>eTable 8. LASSO Regression Results: Model 1</b>                                      | 13 |
| <b>eTable 9. LASSO Regression Results: Model 2</b>                                      | 20 |
| <b>eTable 10. LASSO Regression Results: Model 3</b>                                     | 26 |
| <b>eTable 11. LASSO Regression Results: Model 4</b>                                     | 31 |
| <b>eTable 12. LASSO Regression Results: Model 5</b>                                     | 34 |
| <b>eFigure 1. Distribution of PHQ-9 Score across Risk Groups by Asthma</b>              | 36 |
| <b>eFigure 2. Distribution of PHQ-9 Score across Risk Groups by Backache</b>            | 37 |
| <b>eFigure 3. Distribution of PHQ-9 Score across Risk Groups by Memory Change</b>       | 38 |
| <b>eFigure 4. Distribution of PHQ-9 Score across Risk Groups by Body Image Concerns</b> | 39 |
| <b>eFigure 5. Distribution of PHQ-9 Score across Risk Groups by Sleep Apnea</b>         | 40 |

**eTable 1. Key Variables Included in Each LASSO Covariate Model**

| Variables                                                               | Model 1 | Model 2 | Model 3 | Model 4 | Model 5 |
|-------------------------------------------------------------------------|---------|---------|---------|---------|---------|
| Age, sex and age × sex interaction                                      | ✓       | ✓       | ✓       | ✓       | ✓       |
| Race and ethnicity                                                      |         | ✓       | ✓       | ✓       | ✓       |
| Socioeconomic-related variables                                         |         | ✓       | ✓       | ✓       | ✓       |
| Behavioral-related behaviors                                            |         | ✓       | ✓       | ✓       | ✓       |
| Medical conditions <i>not</i> related to mental health / depression     |         |         | ✓       | ✓       | ✓       |
| Symptoms and allergies <i>not</i> related to mental health / depression |         |         |         | ✓       | ✓       |
| Physical health metrics                                                 |         |         |         |         | ✓       |
| Standard labs                                                           |         |         |         |         |         |

**eTable 2. Additional Medical History: PHQ-9 Scores**

|                                  | 0<br>(N=484) | 1–4<br>(N=1086) | 5–9<br>(N=518) | 10–14<br>(N=184) | 15+<br>(N=93) |
|----------------------------------|--------------|-----------------|----------------|------------------|---------------|
| Nonmelanoma skin cancer          | 12 (2.5)     | 42 (3.9)        | 18 (3.5)       | 3 (1.6)          | 0 (0.0)*      |
| Osteoporosis                     | 11 (2.3)     | 47 (4.3)        | 17 (3.3)       | 3 (1.6)          | 0 (0.0)*      |
| Benign prostatic hyperplasia     | 22 (4.5)     | 44 (4.1)        | 17 (3.3)       | 3 (1.6)          | 0 (0.0)*      |
| Melanoma skin cancer             | 11 (2.3)     | 23 (2.1)        | 5 (1.0)        | 0 (0.0)          | 0 (0.0)*      |
| Prostate cancer                  | 12 (2.5)     | 17 (1.6)        | 6 (1.2)        | 1 (0.5)          | 0 (0.0)*      |
| Diabetes type 1                  | 3 (0.6)      | 12 (1.1)        | 4 (0.8)        | 3 (1.6)          | 0 (0.0)       |
| Macular degeneration             | 2 (0.4)      | 20 (1.8)        | 4 (0.8)        | 4 (2.2)          | 0 (0.0)       |
| TIA                              | 7 (1.4)      | 9 (0.8)         | 3 (0.6)        | 3 (1.6)          | 0 (0.0)       |
| Hepatitis B                      | 6 (1.2)      | 10 (0.9)        | 4 (0.8)        | 3 (1.6)          | 0 (0.0)       |
| Coronary artery disease          | 11 (2.3)     | 44 (4.1)        | 13 (2.5)       | 6 (3.3)          | 1 (1.1)       |
| Hashimoto's disease              | 8 (1.7)      | 22 (2.0)        | 11 (2.1)       | 3 (1.6)          | 1 (1.1)       |
| Goiter                           | 7 (1.4)      | 12 (1.1)        | 3 (0.6)        | 0 (0.0)          | 1 (1.1)       |
| Hemorrhoids                      | 11 (2.3)     | 44 (4.1)        | 18 (3.5)       | 4 (2.2)          | 1 (1.1)       |
| Hypothyroidism                   | 42 (8.7)     | 93 (8.6)        | 40 (7.7)       | 9 (4.9)          | 2 (2.2)       |
| Glaucoma                         | 14 (2.9)     | 29 (2.7)        | 10 (1.9)       | 6 (3.3)          | 2 (2.2)       |
| Psoriasis                        | 10 (2.1)     | 16 (1.5)        | 11 (2.1)       | 8 (4.3)          | 2 (2.2)       |
| Peptic ulcer                     | 5 (1.0)      | 22 (2.0)        | 13 (2.5)       | 4 (2.2)          | 2 (2.2)       |
| Diverticulosis                   | 8 (1.7)      | 29 (2.7)        | 10 (1.9)       | 5 (2.7)          | 2 (2.2)       |
| Peripheral vascular disorder     | 1 (0.2)      | 15 (1.4)        | 8 (1.5)        | 2 (1.1)          | 2 (2.2)       |
| Atrial fibrillation              | 4 (0.8)      | 17 (1.6)        | 1 (0.2)        | 1 (0.5)          | 2 (2.2)       |
| Colon polyps                     | 53 (11.0)    | 113 (10.4)      | 52 (10.0)      | 12 (6.5)         | 3 (3.2)       |
| Arrhythmia                       | 20 (4.1)     | 69 (6.4)        | 27 (5.2)       | 8 (4.3)          | 3 (3.2)       |
| Tinnitus                         | 31 (6.4)     | 52 (4.8)        | 35 (6.8)       | 6 (3.3)          | 3 (3.2)       |
| Hearing Loss                     | 29 (6.0)     | 75 (6.9)        | 26 (5.0)       | 12 (6.5)         | 3 (3.2)       |
| Gout                             | 14 (2.9)     | 29 (2.7)        | 14 (2.7)       | 5 (2.7)          | 3 (3.2)       |
| Diverticulitis                   | 3 (0.6)      | 20 (1.8)        | 17 (3.3)       | 3 (1.6)          | 3 (3.2)       |
| Headaches                        | 6 (1.2)      | 18 (1.7)        | 13 (2.5)       | 3 (1.6)          | 3 (3.2)       |
| Epilepsy                         | 5 (1.0)      | 19 (1.7)        | 12 (2.3)       | 5 (2.7)          | 3 (3.2)       |
| Breast cancer                    | 8 (1.7)      | 20 (1.8)        | 9 (1.7)        | 1 (0.5)          | 3 (3.2)       |
| Myocardial infarction            | 6 (1.2)      | 19 (1.7)        | 11 (2.1)       | 1 (0.5)          | 3 (3.2)       |
| Osteopenia                       | 22 (4.5)     | 62 (5.7)        | 22 (4.2)       | 1 (0.5)          | 3 (3.2)       |
| Stroke                           | 5 (1.0)      | 12 (1.1)        | 9 (1.7)        | 1 (0.5)          | 3 (3.2)       |
| Drug abuse*                      | 5 (1.0)      | 14 (1.3)        | 5 (1.0)        | 13 (7.1)         | 4 (4.3)       |
| Pulmonary embolism               | 4 (0.8)      | 17 (1.6)        | 7 (1.4)        | 3 (1.6)          | 4 (4.3)       |
| Nonalcoholic fatty liver disease | 5 (1.0)      | 17 (1.6)        | 16 (3.1)       | 3 (1.6)          | 4 (4.3)       |
| Hepatitis C†                     | 5 (1.0)      | 8 (0.7)         | 3 (0.6)        | 8 (4.3)          | 4 (4.3)       |
| Cataracts                        | 61 (12.6)    | 167 (15.4)      | 63 (12.2)      | 16 (8.7)         | 5 (5.4)       |
| Kidney or bladder stones         | 36 (7.4)     | 66 (6.1)        | 18 (3.5)       | 13 (7.1)         | 5 (5.4)       |

|                            |            |            |            |           |           |
|----------------------------|------------|------------|------------|-----------|-----------|
| Concussions                | 19 (3.9)   | 62 (5.7)   | 35 (6.8)   | 13 (7.1)  | 5 (5.4)   |
| Rheumatoid arthritis†      | 4 (0.8)    | 13 (1.2)   | 12 (2.3)   | 4 (2.2)   | 6 (6.5)   |
| Gallbladder disorder†      | 18 (3.7)   | 57 (5.2)   | 32 (6.2)   | 14 (7.6)  | 8 (8.6)   |
| Hypercholesterolemia       | 68 (14.0)  | 127 (11.7) | 70 (13.5)  | 19 (10.3) | 9 (9.7)   |
| Irritable bowel disorder†  | 9 (1.9)    | 60 (5.5)   | 34 (6.6)   | 7 (3.8)   | 10 (10.8) |
| Sleep apnea                | 38 (7.9)   | 101 (9.3)  | 63 (12.2)  | 19 (10.3) | 11 (11.8) |
| Diabetes type 2†           | 45 (9.3)   | 109 (10.0) | 62 (12.0)  | 32 (17.4) | 14 (15.1) |
| Pneumonia                  | 30 (6.2)   | 85 (7.8)   | 40 (7.7)   | 12 (6.5)  | 15 (16.1) |
| Osteoarthritis             | 76 (15.7)  | 216 (19.9) | 118 (22.8) | 33 (17.9) | 17 (18.3) |
| Hypertension               | 122 (25.2) | 297 (27.3) | 144 (27.8) | 51 (27.7) | 26 (28.0) |
| Hay fever                  | 26 (5.4)   | 78 (7.2)   | 36 (6.9)   | 19 (10.3) | 3 (3.2)   |
| Discharge†                 | 19 (3.9)   | 64 (5.9)   | 44 (8.5)   | 18 (9.8)  | 8 (8.6)   |
| Hemorrhoids†               | 22 (4.5)   | 69 (6.4)   | 40 (7.7)   | 17 (9.2)  | 9 (9.7)   |
| Ear ringing†               | 38 (7.9)   | 101 (9.3)  | 59 (11.4)  | 23 (12.5) | 13 (14.0) |
| Easy bruising or bleeding† | 39 (8.1)   | 130 (12.0) | 68 (13.1)  | 22 (12.0) | 18 (19.4) |
| Runny nose†                | 70 (14.5)  | 210 (19.3) | 116 (22.4) | 44 (23.9) | 20 (21.5) |
| Floater†                   | 55 (11.4)  | 160 (14.7) | 81 (15.6)  | 28 (15.2) | 21 (22.6) |

Data shown are no. (%), unless otherwise indicated.

P-values for trend were calculated with the use of Spearman Correlation or Cochran-Armitage tests, where appropriate.

\*P-value for trend <0.0001.

†P-value for trend <0.01.

**eTable 3. Estimates of the Non-Zero Coefficients from LASSO Model 1**

| <b>Variable</b> | <b>Estimate</b> |
|-----------------|-----------------|
| Age             | -0.152          |
| Age x sex       | 0.063           |

LASSO regression model 1 comprised age, sex, and age by sex interaction. Variables with zero estimates are not shown.

**eTable 4. Estimates of the Non-Zero Coefficients from LASSO Model 2**

| <b>Variable</b>               | <b>Estimate</b> |
|-------------------------------|-----------------|
| Age                           | -0.167          |
| Current smoker                | 0.103           |
| Not employed                  | 0.096           |
| Black race                    | -0.076          |
| Age x sex                     | 0.074           |
| Former smoker                 | 0.061           |
| Number of pack-years smoked   | 0.058           |
| Income < \$25,000             | 0.057           |
| Asian race                    | -0.042          |
| Uninsured                     | 0.032           |
| Married                       | -0.025          |
| AUDIT-C score                 | -0.012          |
| High school or less education | 0.009           |
| Other race                    | 0.005           |
| Hispanic ethnicity            | 0.003           |

LASSO regression model 2 comprised age, sex, age by sex interaction, race, ethnicity, socioeconomic status and health behaviors. Variables with zero estimates are not shown.

AUDIT-C, Alcohol Use Disorders Identification Test-Concise; LASSO, least absolute shrinkage and selection operator.

**eTable 5. Estimates of the Non-Zero Coefficients from LASSO Model 3**

| <b>Variable</b>                  | <b>Estimate</b> |
|----------------------------------|-----------------|
| Age                              | -0.194          |
| Current smoker                   | 0.106           |
| Not employed                     | 0.065           |
| Former smoker                    | 0.054           |
| Uninsured                        | 0.049           |
| COPD with emphysema              | 0.048           |
| Asthma                           | 0.048           |
| Sleep apnea                      | 0.048           |
| Fibromyalgia                     | 0.038           |
| Married                          | -0.037          |
| GERD                             | 0.036           |
| Age x sex                        | 0.035           |
| Kidney or bladder stones         | -0.032          |
| Osteoarthritis                   | 0.03            |
| Asian race                       | -0.029          |
| Hypertension                     | 0.028           |
| Epilepsy                         | 0.027           |
| Irritable bowel disorder         | 0.025           |
| Diverticulitis                   | 0.024           |
| Pulmonary embolism               | 0.023           |
| Migraines                        | 0.023           |
| Black race                       | -0.02           |
| Chronic headaches                | 0.017           |
| Hepatitis C                      | 0.017           |
| Income < \$25,000                | 0.016           |
| Diabetes type 2                  | 0.015           |
| Cataracts                        | 0.011           |
| Osteoporosis                     | -0.011          |
| Goiter                           | -0.011          |
| Rheumatoid arthritis             | 0.01            |
| Psoriasis                        | 0.01            |
| Nonmelanoma skin cancer          | 0.009           |
| Number of pack-years smoked      | 0.009           |
| Hypothyroidism                   | -0.009          |
| Arrhythmia                       | 0.008           |
| Glaucoma                         | 0.008           |
| Female                           | 0.006           |
| Nonalcoholic fatty liver disease | 0.006           |
| Prostate cancer                  | -0.003          |

---

**Hypercholesterolemia**

0.002

---

LASSO regression model 3 comprised age, sex, age by sex interaction, race, ethnicity, socioeconomic status, health behaviors, and medical conditions (except mental health disorder diagnoses or disorders directly related to mental health or depression). Variables with zero estimates are not shown.

COPD, chronic obstructive pulmonary disease; GERD, gastroesophageal reflux disease; LASSO, least absolute shrinkage and selection operator.



**eTable 6. Estimates of the Non-Zero Coefficients from LASSO Model 4**

| <b>Variable</b>                   | <b>Estimate</b> |
|-----------------------------------|-----------------|
| Age                               | -0.14           |
| Tension                           | 0.095           |
| Body image concerns               | 0.085           |
| Current smoker                    | 0.071           |
| Not employed                      | 0.06            |
| Memory change                     | 0.059           |
| Uninsured                         | 0.042           |
| Asthma                            | 0.041           |
| Shortness of breath               | 0.039           |
| Backache                          | 0.037           |
| Sleep apnea                       | 0.037           |
| Former smoker                     | 0.035           |
| Lightheadedness                   | 0.034           |
| Kidney or bladder stones          | -0.026          |
| Married                           | -0.025          |
| Neck or low back pain             | 0.022           |
| Black race                        | -0.021          |
| Coughing up sputum                | 0.019           |
| Osteoarthritis                    | 0.019           |
| Headache                          | 0.017           |
| Food allergies                    | 0.016           |
| Diverticulitis                    | 0.015           |
| Cataracts                         | 0.014           |
| Constipation                      | 0.014           |
| Asian race                        | -0.014          |
| Shortness of breath with exercise | 0.012           |
| Hypothyroidism                    | -0.012          |
| Fibromyalgia                      | 0.011           |
| Epilepsy                          | 0.011           |
| GERD                              | 0.011           |
| Migraines                         | 0.011           |
| Joint pain swelling               | 0.009           |
| COPD with emphysema               | 0.009           |
| Heat or cold intolerance          | 0.009           |
| Pulmonary embolism                | 0.009           |
| Bloating                          | 0.009           |
| Diabetes type 2                   | 0.007           |
| Swelling in calves or feet        | 0.007           |
| Irritable bowel disorder          | 0.007           |

|                         |        |
|-------------------------|--------|
| Nasal stuffiness        | 0.007  |
| Pneumonia               | 0.004  |
| Nonmelanoma skin cancer | 0.004  |
| Hypertension            | 0.004  |
| Psoriasis               | 0.002  |
| Cough                   | 0.002  |
| Chronic headaches       | 0.002  |
| Hepatitis C             | 0.001  |
| Prostate cancer         | -0.001 |

---

LASSO regression model 4 comprised age, sex, age by sex interaction, race, ethnicity, socioeconomic status, health behaviors, medical conditions (except mental health disorder diagnoses or disorders directly related to mental health or depression), symptoms (except those that are directly related to mental health or depression), and allergies. Variables with zero estimates are not shown. COPD, chronic obstructive pulmonary disease; GERD, gastroesophageal reflux disease; LASSO, least absolute shrinkage and selection operator.

**eTable 7. Estimates of the Non-Zero Coefficients from LASSO Model 5**

| <b>Variable</b>                            | <b>Estimate</b> |
|--------------------------------------------|-----------------|
| Age                                        | -0.148          |
| Tension                                    | 0.094           |
| Body image concerns                        | 0.077           |
| Current smoker                             | 0.068           |
| Memory change                              | 0.062           |
| Not employed                               | 0.051           |
| Waist circumference                        | 0.049           |
| Black race                                 | -0.042          |
| Asthma                                     | 0.038           |
| 6-minute walk                              | -0.037          |
| Uninsured                                  | 0.036           |
| Backache                                   | 0.035           |
| Days watch worn 10+ hours in first 30 days | -0.032          |
| Lightheadedness                            | 0.031           |
| BMI                                        | 0.031           |
| Former smoker                              | 0.031           |
| Shortness of breath                        | 0.029           |
| Kidney or bladder stones                   | -0.026          |
| Sleep apnea                                | 0.025           |
| Neck or low back pain                      | 0.022           |
| Coughing up sputum                         | 0.021           |
| Cataracts                                  | 0.02            |
| Mean daily steps in first 30 days          | -0.019          |
| Constipation                               | 0.018           |
| Married                                    | -0.017          |
| Ejection fraction at rest                  | 0.016           |
| Food allergies                             | 0.016           |
| Osteoarthritis                             | 0.015           |
| Heart rate                                 | 0.015           |
| Hypothyroidism                             | -0.015          |
| Coronary calcium score                     | -0.015          |
| Heat or cold intolerance                   | 0.013           |
| Headache                                   | 0.013           |
| Irritable bowel disorder                   | 0.013           |
| Diverticulitis                             | 0.012           |
| Handgrip                                   | -0.012          |
| Bloating                                   | 0.011           |
| Nonmelanoma skin cancer                    | 0.01            |
| Migraines                                  | 0.01            |

|                                   |        |
|-----------------------------------|--------|
| Asian race                        | -0.01  |
| AUDIT-C                           | 0.009  |
| Joint pain swelling               | 0.009  |
| Epilepsy                          | 0.009  |
| Pneumonia                         | 0.008  |
| COPD with emphysema               | 0.007  |
| Pulmonary embolism                | 0.007  |
| Respiratory rate                  | 0.007  |
| Gallbladder disease               | -0.007 |
| Nasal stuffiness                  | 0.006  |
| 30 second chair stand             | -0.005 |
| GERD                              | 0.004  |
| Discharge                         | -0.004 |
| Shortness of breath with exercise | 0.002  |
| Fibromyalgia                      | 0.002  |
| Colon polyps                      | 0.002  |
| Arrhythmia                        | 0.001  |
| Goiter                            | -0.001 |

---

LASSO regression model 5 comprised age, sex, age by sex interaction, race, ethnicity, socioeconomic status, health behaviors, medical conditions (except mental health disorder diagnoses or disorders directly related to mental health or depression), symptoms (except those that are directly related to mental health or depression), allergies, and physical function. Variables with zero estimates are not shown.

AUDIT-C, Alcohol Use Disorders Identification Test-Concise; BMI, body mass index; COPD, chronic obstructive pulmonary disease; GERD, gastroesophageal reflux disease; LASSO, least absolute shrinkage and selection operator.

**eTable 8. LASSO Regression Results: Model 1**

| Variable                            | Estimate | P-value  | CI 25%  | CI 75%  |
|-------------------------------------|----------|----------|---------|---------|
| Tension                             | 0.2344   | < 0.0001 | 0.2026  | 0.2661  |
| Memory change                       | 0.2119   | < 0.0001 | 0.1801  | 0.2437  |
| Shortness of breath                 | 0.2033   | < 0.0001 | 0.1714  | 0.2352  |
| Backache                            | 0.1974   | < 0.0001 | 0.1655  | 0.2293  |
| Shortness of breath with exercise   | 0.1914   | < 0.0001 | 0.1594  | 0.2233  |
| Neck or low back pain               | 0.1869   | < 0.0001 | 0.1549  | 0.2189  |
| Waist circumference                 | 0.1814   | < 0.0001 | 0.1480  | 0.2149  |
| Mean leg balance time               | -0.1796  | < 0.0001 | -0.2172 | -0.1420 |
| Body image concerns                 | 0.1726   | < 0.0001 | 0.1403  | 0.2049  |
| 6-minute walk                       | -0.1608  | < 0.0001 | -0.1932 | -0.1284 |
| BMI                                 | 0.1604   | < 0.0001 | 0.1282  | 0.1926  |
| Number of pack-years smoked         | 0.1590   | < 0.0001 | 0.1258  | 0.1922  |
| Lightheadedness                     | 0.1576   | < 0.0001 | 0.1254  | 0.1899  |
| Current smoker                      | 0.1561   | < 0.0001 | 0.1238  | 0.1884  |
| Heat or cold intolerance            | 0.1560   | < 0.0001 | 0.1238  | 0.1882  |
| Headache                            | 0.1532   | < 0.0001 | 0.1205  | 0.1859  |
| Not employed                        | 0.1434   | < 0.0001 | 0.1111  | 0.1757  |
| Swelling in calves or feet          | 0.1421   | < 0.0001 | 0.1098  | 0.1745  |
| Coughing up sputum                  | 0.1416   | < 0.0001 | 0.1093  | 0.1739  |
| 30 second chair stand               | -0.1407  | < 0.0001 | -0.1732 | -0.1081 |
| Tingling or pins and needles        | 0.1403   | < 0.0001 | 0.1079  | 0.1727  |
| Tingling or numbness in extremities | 0.1373   | < 0.0001 | 0.1049  | 0.1697  |
| Sit-rise score                      | -0.1345  | < 0.0001 | -0.1714 | -0.0975 |
| Muscle or joint pain                | 0.1343   | < 0.0001 | 0.1019  | 0.1668  |
| Constipation                        | 0.1334   | < 0.0001 | 0.1010  | 0.1657  |
| Income < \$25,000                   | 0.1325   | < 0.0001 | 0.1001  | 0.1650  |
| WBC count                           | 0.1322   | < 0.0001 | 0.0998  | 0.1647  |
| Bloating                            | 0.1305   | < 0.0001 | 0.0979  | 0.1631  |
| Cough                               | 0.1276   | < 0.0001 | 0.0952  | 0.1601  |
| Frequency of urination              | 0.1274   | < 0.0001 | 0.0945  | 0.1603  |
| Nasal stuffiness                    | 0.1259   | < 0.0001 | 0.0934  | 0.1583  |
| COPD with emphysema                 | 0.1228   | < 0.0001 | 0.0901  | 0.1555  |
| Joint pain swelling                 | 0.1225   | < 0.0001 | 0.0899  | 0.1550  |
| Heartburn                           | 0.1215   | < 0.0001 | 0.0890  | 0.1540  |
| Pain or stiffness in the neck       | 0.1206   | < 0.0001 | 0.0881  | 0.1531  |
| Stiffness                           | 0.1194   | < 0.0001 | 0.0868  | 0.1520  |
| Mean daily steps in first 30 days   | -0.1176  | < 0.0001 | -0.1503 | -0.0848 |
| Heart rate                          | 0.1165   | < 0.0001 | 0.0835  | 0.1495  |
| Urination at night                  | 0.1158   | < 0.0001 | 0.0823  | 0.1492  |
| HbA1c                               | 0.1144   | < 0.0001 | 0.0813  | 0.1476  |
| Diarrhea                            | 0.1138   | < 0.0001 | 0.0812  | 0.1463  |
| 10-meter walk speed                 | -0.1137  | < 0.0001 | -0.1463 | -0.0810 |
| Blood glucose                       | 0.1136   | < 0.0001 | 0.0808  | 0.1463  |
| Oxygen saturation                   | -0.1118  | < 0.0001 | -0.1458 | -0.0777 |
| Dry mouth                           | 0.1117   | < 0.0001 | 0.0791  | 0.1444  |
| Night sweats                        | 0.1110   | < 0.0001 | 0.0784  | 0.1435  |
| C-reactive protein                  | 0.1084   | < 0.0001 | 0.0759  | 0.1409  |
| Urgency                             | 0.1080   | < 0.0001 | 0.0751  | 0.1410  |
| Monocytes                           | 0.1075   | < 0.0001 | 0.0742  | 0.1408  |
| Neutrophils                         | 0.1072   | < 0.0001 | 0.0747  | 0.1398  |
| Numbness or loss of sensation       | 0.1055   | < 0.0001 | 0.0729  | 0.1380  |
| GERD                                | 0.1004   | < 0.0001 | 0.0675  | 0.1334  |

|                                            |         |          |         |         |
|--------------------------------------------|---------|----------|---------|---------|
| Itching skin                               | 0.0971  | < 0.0001 | 0.0645  | 0.1297  |
| Excessive belching or passing of gas       | 0.0957  | < 0.0001 | 0.0631  | 0.1283  |
| Respiratory rate                           | 0.0944  | < 0.0001 | 0.0618  | 0.1270  |
| Leg cramps                                 | 0.0933  | < 0.0001 | 0.0606  | 0.1260  |
| Urine specific gravity                     | 0.0931  | < 0.0001 | 0.0605  | 0.1257  |
| Albumin in urine                           | -0.0928 | < 0.0001 | -0.1261 | -0.0595 |
| Dryness                                    | 0.0926  | < 0.0001 | 0.0600  | 0.1252  |
| Absolute basophils                         | 0.0925  | < 0.0001 | 0.0598  | 0.1251  |
| Uninsured                                  | 0.0924  | < 0.0001 | 0.0597  | 0.1250  |
| Cramping                                   | 0.0920  | < 0.0001 | 0.0592  | 0.1248  |
| Osteoarthritis                             | 0.0917  | < 0.0001 | 0.0568  | 0.1267  |
| Lymphocytes (total)                        | 0.0883  | < 0.0001 | 0.0554  | 0.1213  |
| Sleep apnea                                | 0.0877  | < 0.0001 | 0.0541  | 0.1213  |
| ALT                                        | 0.0848  | < 0.0001 | 0.0522  | 0.1175  |
| Married                                    | -0.0848 | < 0.0001 | -0.1188 | -0.0508 |
| Sinus pain                                 | 0.0838  | < 0.0001 | 0.0511  | 0.1164  |
| HDL                                        | -0.0835 | < 0.0001 | -0.1161 | -0.0509 |
| Creatinine (urine)                         | 0.0811  | < 0.0001 | 0.0484  | 0.1138  |
| Reticulocytes (% RBC)                      | 0.0803  | < 0.0001 | 0.0475  | 0.1131  |
| Triglycerides                              | 0.0800  | < 0.0001 | 0.0471  | 0.1128  |
| Fibromyalgia                               | 0.0798  | < 0.0001 | 0.0472  | 0.1125  |
| Asthma                                     | 0.0796  | < 0.0001 | 0.0469  | 0.1123  |
| Former smoker                              | 0.0791  | < 0.0001 | 0.0454  | 0.1127  |
| Absolute reticulocytes                     | 0.0786  | < 0.0001 | 0.0458  | 0.1114  |
| Diabetes type 2                            | 0.0780  | < 0.0001 | 0.0448  | 0.1111  |
| Urine reaction pH                          | -0.0762 | < 0.0001 | -0.1095 | -0.0430 |
| Migraines                                  | 0.0753  | < 0.0001 | 0.0425  | 0.1081  |
| Hypertension                               | 0.0749  | < 0.0001 | 0.0397  | 0.1102  |
| Runny nose                                 | 0.0738  | < 0.0001 | 0.0411  | 0.1065  |
| Vitamin D                                  | -0.0732 | < 0.0001 | -0.1067 | -0.0397 |
| Easy bruising or bleeding                  | 0.0719  | < 0.0001 | 0.0390  | 0.1049  |
| High school or less education              | 0.0706  | < 0.0001 | 0.0379  | 0.1033  |
| Floaters                                   | 0.0701  | < 0.0001 | 0.0370  | 0.1033  |
| Discharge                                  | 0.0698  | < 0.0001 | 0.0372  | 0.1025  |
| Ear ringing                                | 0.0671  | < 0.0001 | 0.0338  | 0.1003  |
| Hemorrhoids (symptom)                      | 0.0649  | 0.0001   | 0.0320  | 0.0977  |
| Days watch worn 10+ hours in first 30 days | -0.0639 | 0.0002   | -0.0976 | -0.0301 |
| Asian race                                 | -0.0636 | 0.0002   | -0.0964 | -0.0307 |
| Absolute eosinophils                       | 0.0632  | 0.0002   | 0.0304  | 0.0960  |
| Seasonal allergies                         | 0.0626  | 0.0002   | 0.0299  | 0.0954  |
| Medication allergies                       | 0.0612  | 0.0003   | 0.0283  | 0.0941  |
| Irritable bowel disorder                   | 0.0585  | 0.0005   | 0.0258  | 0.0912  |
| Hepatitis C                                | 0.0579  | 0.0005   | 0.0252  | 0.0907  |
| Rheumatoid arthritis                       | 0.0572  | 0.0006   | 0.0244  | 0.0900  |
| Systolic blood pressure                    | 0.0566  | 0.0017   | 0.0212  | 0.0920  |
| Diverticulitis                             | 0.0561  | 0.0008   | 0.0232  | 0.0890  |
| Uric acid                                  | 0.0538  | 0.0019   | 0.0199  | 0.0876  |
| Magnesium                                  | -0.0537 | 0.0013   | -0.0865 | -0.0209 |
| MCHC                                       | -0.0533 | 0.0015   | -0.0861 | -0.0205 |
| Handgrip                                   | -0.0514 | 0.0021   | -0.0842 | -0.0187 |
| Gallbladder disease                        | 0.0488  | 0.0036   | 0.0160  | 0.0816  |
| MCH                                        | -0.0465 | 0.0065   | -0.0799 | -0.0130 |
| AST                                        | 0.0443  | 0.0080   | 0.0116  | 0.0771  |
| Epilepsy                                   | 0.0427  | 0.0106   | 0.0100  | 0.0755  |

|                                  |         |        |         |         |
|----------------------------------|---------|--------|---------|---------|
| Food allergies                   | 0.0424  | 0.0112 | 0.0096  | 0.0752  |
| Diastolic blood pressure         | 0.0420  | 0.0124 | 0.0091  | 0.0748  |
| Pneumonia                        | 0.0403  | 0.0163 | 0.0074  | 0.0732  |
| Nonalcoholic fatty liver disease | 0.0403  | 0.0159 | 0.0075  | 0.0731  |
| Ejection fraction at rest        | 0.0403  | 0.0161 | 0.0075  | 0.0731  |
| Non-seasonal allergies           | 0.0393  | 0.0189 | 0.0065  | 0.0722  |
| Serum creatinine                 | 0.0388  | 0.0239 | 0.0051  | 0.0725  |
| Protein (serum)                  | -0.0381 | 0.0299 | -0.0725 | -0.0037 |
| Cataracts                        | 0.0368  | 0.0513 | -0.0002 | 0.0737  |
| Pulmonary embolism               | 0.0359  | 0.0321 | 0.0031  | 0.0688  |
| Peripheral vascular disease      | 0.0344  | 0.0401 | 0.0016  | 0.0673  |
| Hay fever                        | 0.0342  | 0.0413 | 0.0014  | 0.0671  |
| Stroke                           | 0.0337  | 0.0450 | 0.0008  | 0.0667  |
| MCV                              | -0.0331 | 0.0529 | -0.0666 | 0.0004  |
| Diverticulosis                   | 0.0324  | 0.0541 | -0.0006 | 0.0655  |
| Arrhythmia                       | 0.0324  | 0.0584 | -0.0012 | 0.0659  |
| Gout                             | 0.0323  | 0.0570 | -0.0010 | 0.0655  |
| Myocardial infarction            | 0.0317  | 0.0606 | -0.0014 | 0.0649  |
| Cholesterol                      | -0.0305 | 0.0685 | -0.0633 | 0.0023  |
| Platelets                        | 0.0303  | 0.0783 | -0.0034 | 0.0640  |
| LDL                              | -0.0301 | 0.0726 | -0.0630 | 0.0028  |
| Peptic ulcer                     | 0.0300  | 0.0730 | -0.0028 | 0.0628  |
| Hypercholesterolemia             | 0.0297  | 0.0879 | -0.0044 | 0.0638  |
| Goiter                           | -0.0290 | 0.0836 | -0.0618 | 0.0039  |
| Coronary artery disease          | 0.0287  | 0.0959 | -0.0051 | 0.0625  |
| Chloride                         | -0.0268 | 0.1096 | -0.0596 | 0.0060  |
| Neutrophil lymphocyte ratio      | 0.0266  | 0.1156 | -0.0065 | 0.0597  |
| Basophils (% WBC)                | 0.0258  | 0.1242 | -0.0071 | 0.0587  |
| Chronic headaches                | 0.0258  | 0.1236 | -0.0070 | 0.0586  |
| Nonmelanoma skin cancer          | 0.0233  | 0.1738 | -0.0103 | 0.0569  |
| Hearing loss                     | 0.0229  | 0.1869 | -0.0111 | 0.0568  |
| MPV                              | 0.0224  | 0.1802 | -0.0104 | 0.0552  |
| AUDIT-C sum score                | -0.0219 | 0.1897 | -0.0547 | 0.0109  |
| Benign prostatic hyperplasia     | 0.0218  | 0.2273 | -0.0136 | 0.0571  |
| Eosinophils (% WBC)              | 0.0216  | 0.2001 | -0.0114 | 0.0545  |
| Hypothyroidism                   | -0.0213 | 0.2064 | -0.0544 | 0.0118  |
| Macular degeneration             | 0.0209  | 0.2140 | -0.0121 | 0.0540  |
| Left ventricular mass index      | 0.0197  | 0.2623 | -0.0147 | 0.0541  |
| Hemoglobin                       | -0.0181 | 0.2868 | -0.0515 | 0.0153  |
| RBC count                        | 0.0180  | 0.2814 | -0.0148 | 0.0508  |
| Psoriasis                        | 0.0170  | 0.3108 | -0.0158 | 0.0497  |
| Lymphocytes (% WBC)              | -0.0166 | 0.3270 | -0.0499 | 0.0166  |
| Kidney or bladder stones         | -0.0159 | 0.3448 | -0.0490 | 0.0171  |
| Glaucoma                         | 0.0157  | 0.3547 | -0.0175 | 0.0489  |
| Hemorrhoids                      | 0.0152  | 0.3649 | -0.0177 | 0.0482  |
| Coronary calcium score           | 0.0144  | 0.4287 | -0.0213 | 0.0502  |
| Other race                       | 0.0131  | 0.4445 | -0.0204 | 0.0466  |
| Colon polyps                     | 0.0120  | 0.4975 | -0.0227 | 0.0467  |
| Breast cancer                    | 0.0118  | 0.4826 | -0.0211 | 0.0446  |
| Melanoma skin cancer             | -0.0117 | 0.4889 | -0.0450 | 0.0215  |
| Sodium                           | -0.0117 | 0.4856 | -0.0446 | 0.0212  |
| Calcium                          | -0.0115 | 0.4909 | -0.0443 | 0.0213  |
| Hashimotos Disease               | -0.0108 | 0.5175 | -0.0436 | 0.0220  |
| Transient ischemic attack        | -0.0087 | 0.6029 | -0.0417 | 0.0242  |
| Osteopenia                       | -0.0076 | 0.6521 | -0.0408 | 0.0256  |
| Atrial fibrillation              | 0.0075  | 0.6601 | -0.0258 | 0.0407  |

|                             |         |        |         |        |
|-----------------------------|---------|--------|---------|--------|
| Neutrophil segments (% WBC) | 0.0071  | 0.6714 | -0.0257 | 0.0399 |
| Total neutrophils (% WBC)   | 0.0071  | 0.6714 | -0.0257 | 0.0399 |
| TSH                         | 0.0069  | 0.6786 | -0.0259 | 0.0397 |
| Potassium                   | -0.0060 | 0.7193 | -0.0390 | 0.0269 |
| Hematocrit                  | -0.0049 | 0.7722 | -0.0383 | 0.0285 |
| Monocytes (% WBC)           | 0.0041  | 0.8177 | -0.0305 | 0.0386 |
| Osteoporosis                | -0.0039 | 0.8192 | -0.0369 | 0.0292 |
| GFR MDRD                    | 0.0030  | 0.8737 | -0.0343 | 0.0403 |
| Tinnitus                    | 0.0029  | 0.8627 | -0.0304 | 0.0362 |
| Diabetes type 1             | -0.0027 | 0.8707 | -0.0356 | 0.0301 |
| Hispanic ethnicity          | -0.0023 | 0.8914 | -0.0360 | 0.0314 |
| Hepatitis B                 | -0.0022 | 0.8963 | -0.0351 | 0.0307 |
| Prostate cancer             | -0.0009 | 0.9575 | -0.0348 | 0.0329 |
| Black race                  | 0.0004  | 0.9790 | -0.0325 | 0.0334 |

LASSO regression model 1 comprised age, sex, and age by sex interaction. The LASSO-predicted value was used to estimate a covariate-adjusted effect for all other candidate variables shown.

ALT, alanine aminotransferase; AST, aspartate aminotransferase; AUDIT-C, Alcohol Use Disorders Identification Test-Concise; BMI, body mass index; COPD, chronic obstructive pulmonary disease; GFR, glomerular filtration rate; GERD, gastroesophageal reflux disease; HbA1c, hemoglobin A1c; HDL, high density lipoprotein; LASSO, least absolute shrinkage and selection operator; LDL, low density lipoprotein; MCH, mean corpuscular hemoglobin; MCHC, mean corpuscular hemoglobin concentration; MCV, mean corpuscular volume; MDRD, modification of diet in renal disease; RBC, red blood cells; TSH, thyroid-stimulating hormone; WBC, white blood cells.



**eTable 9. LASSO Regression Results: Model 2**

| Variable                             | Estimate | P-value  | CI 25%  | CI 75%  |
|--------------------------------------|----------|----------|---------|---------|
| Tension                              | 0.1970   | < 0.0001 | 0.1659  | 0.2282  |
| Memory change                        | 0.1732   | < 0.0001 | 0.1423  | 0.2040  |
| Backache                             | 0.1585   | < 0.0001 | 0.1273  | 0.1898  |
| Body image concerns                  | 0.1527   | < 0.0001 | 0.1216  | 0.1837  |
| Neck or low back pain                | 0.1419   | < 0.0001 | 0.1105  | 0.1733  |
| Shortness of breath with exercise    | 0.1336   | < 0.0001 | 0.1019  | 0.1652  |
| Shortness of breath                  | 0.1329   | < 0.0001 | 0.1011  | 0.1646  |
| BMI                                  | 0.1269   | < 0.0001 | 0.0958  | 0.1581  |
| Lightheadedness                      | 0.1268   | < 0.0001 | 0.0955  | 0.1581  |
| Waist circumference                  | 0.1235   | < 0.0001 | 0.0925  | 0.1545  |
| Headache                             | 0.1188   | < 0.0001 | 0.0871  | 0.1505  |
| Heat or cold intolerance             | 0.1159   | < 0.0001 | 0.0845  | 0.1472  |
| 6-minute walk                        | -0.1139  | < 0.0001 | -0.1451 | -0.0827 |
| Constipation                         | 0.1078   | < 0.0001 | 0.0766  | 0.1391  |
| Muscle or joint pain                 | 0.1044   | < 0.0001 | 0.0732  | 0.1356  |
| Swelling in calves or feet           | 0.1036   | < 0.0001 | 0.0723  | 0.1349  |
| Bloating                             | 0.1036   | < 0.0001 | 0.0721  | 0.1351  |
| Nasal stuffiness                     | 0.1014   | < 0.0001 | 0.0702  | 0.1326  |
| Coughing up sputum                   | 0.0978   | < 0.0001 | 0.0663  | 0.1293  |
| Joint pain swelling                  | 0.0971   | < 0.0001 | 0.0659  | 0.1282  |
| Pain or stiffness in the neck        | 0.0937   | < 0.0001 | 0.0623  | 0.1250  |
| Frequency of urination               | 0.0927   | < 0.0001 | 0.0615  | 0.1238  |
| Heartburn                            | 0.0913   | < 0.0001 | 0.0599  | 0.1227  |
| Diarrhea                             | 0.0903   | < 0.0001 | 0.0589  | 0.1216  |
| Tingling or numbness in extremities  | 0.0900   | < 0.0001 | 0.0586  | 0.1214  |
| 30 second chair stand                | -0.0893  | < 0.0001 | -0.1207 | -0.0580 |
| Tingling or pins and needles         | 0.0859   | < 0.0001 | 0.0543  | 0.1176  |
| Cough                                | 0.0855   | < 0.0001 | 0.0539  | 0.1170  |
| C-reactive protein                   | 0.0847   | < 0.0001 | 0.0534  | 0.1161  |
| Blood glucose                        | 0.0819   | < 0.0001 | 0.0506  | 0.1131  |
| Night sweats                         | 0.0811   | < 0.0001 | 0.0497  | 0.1125  |
| Stiffness                            | 0.0806   | < 0.0001 | 0.0492  | 0.1119  |
| Mean leg balance time                | -0.0777  | < 0.0001 | -0.1090 | -0.0464 |
| HbA1c                                | 0.0772   | < 0.0001 | 0.0460  | 0.1084  |
| Heart rate                           | 0.0771   | < 0.0001 | 0.0450  | 0.1092  |
| Urination at night                   | 0.0770   | < 0.0001 | 0.0458  | 0.1082  |
| ALT                                  | 0.0751   | < 0.0001 | 0.0439  | 0.1063  |
| Mean daily steps in first 30 days    | -0.0745  | < 0.0001 | -0.1058 | -0.0432 |
| Urgency                              | 0.0743   | < 0.0001 | 0.0430  | 0.1055  |
| Excessive belching or passing of gas | 0.0739   | < 0.0001 | 0.0426  | 0.1052  |
| GERD                                 | 0.0727   | < 0.0001 | 0.0414  | 0.1039  |
| 10-meter walk speed                  | -0.0721  | < 0.0001 | -0.1035 | -0.0407 |
| Dry mouth                            | 0.0718   | < 0.0001 | 0.0404  | 0.1032  |
| Asthma                               | 0.0715   | < 0.0001 | 0.0403  | 0.1028  |
| Sleep apnea                          | 0.0711   | < 0.0001 | 0.0397  | 0.1024  |
| Itching skin                         | 0.0682   | < 0.0001 | 0.0368  | 0.0997  |
| Sit-rise score                       | -0.0663  | < 0.0001 | -0.0978 | -0.0348 |
| WBC count                            | 0.0653   | < 0.0001 | 0.0327  | 0.0979  |
| MCH                                  | -0.0653  | < 0.0001 | -0.0965 | -0.0340 |
| Sinus pain                           | 0.0652   | < 0.0001 | 0.0338  | 0.0966  |
| Urine specific gravity               | 0.0651   | < 0.0001 | 0.0338  | 0.0965  |

|                                            |         |          |         |         |
|--------------------------------------------|---------|----------|---------|---------|
| Respiratory rate                           | 0.0646  | < 0.0001 | 0.0332  | 0.0960  |
| Absolute reticulocytes                     | 0.0634  | < 0.0001 | 0.0319  | 0.0948  |
| Leg cramps                                 | 0.0632  | < 0.0001 | 0.0319  | 0.0945  |
| Dryness                                    | 0.0622  | 0.0001   | 0.0307  | 0.0937  |
| Numbness or loss of sensation              | 0.0615  | 0.0001   | 0.0299  | 0.0930  |
| Creatinine (urine)                         | 0.0611  | 0.0001   | 0.0297  | 0.0925  |
| Cramping                                   | 0.0602  | 0.0002   | 0.0284  | 0.0920  |
| Reticulocytes (% RBC)                      | 0.0601  | 0.0002   | 0.0286  | 0.0916  |
| Oxygen saturation                          | -0.0597 | 0.0002   | -0.0910 | -0.0284 |
| Albumin in urine                           | -0.0581 | 0.0003   | -0.0894 | -0.0268 |
| Migraines                                  | 0.0581  | 0.0003   | 0.0266  | 0.0896  |
| MCV                                        | -0.0578 | 0.0003   | -0.0891 | -0.0266 |
| Osteoarthritis                             | 0.0561  | 0.0005   | 0.0247  | 0.0876  |
| Seasonal allergies                         | 0.0556  | 0.0005   | 0.0243  | 0.0868  |
| HDL                                        | -0.0534 | 0.0009   | -0.0848 | -0.0220 |
| Hemorrhoids (symptom)                      | 0.0528  | 0.0009   | 0.0215  | 0.0841  |
| Fibromyalgia                               | 0.0525  | 0.0011   | 0.0211  | 0.0840  |
| Lymphocytes (total)                        | 0.0518  | 0.0015   | 0.0198  | 0.0838  |
| Runny nose                                 | 0.0515  | 0.0013   | 0.0201  | 0.0828  |
| Irritable bowel disorder                   | 0.0513  | 0.0013   | 0.0200  | 0.0826  |
| Ear ringing                                | 0.0498  | 0.0019   | 0.0184  | 0.0811  |
| Vitamin D                                  | -0.0497 | 0.0023   | -0.0816 | -0.0178 |
| Days watch worn 10+ hours in first 30 days | -0.0495 | 0.0023   | -0.0813 | -0.0177 |
| COPD with emphysema                        | 0.0488  | 0.0027   | 0.0170  | 0.0807  |
| Food allergies                             | 0.0483  | 0.0025   | 0.0170  | 0.0796  |
| MCHC                                       | -0.0483 | 0.0025   | -0.0797 | -0.0170 |
| Hypertension                               | 0.0479  | 0.0030   | 0.0162  | 0.0795  |
| Urine reaction pH                          | -0.0473 | 0.0031   | -0.0787 | -0.0160 |
| Triglycerides                              | 0.0470  | 0.0033   | 0.0156  | 0.0783  |
| Monocytes                                  | 0.0465  | 0.0037   | 0.0151  | 0.0779  |
| Neutrophils                                | 0.0462  | 0.0049   | 0.0140  | 0.0785  |
| Serum creatinine                           | 0.0460  | 0.0044   | 0.0143  | 0.0777  |
| Uric acid                                  | 0.0460  | 0.0043   | 0.0144  | 0.0775  |
| Diabetes type 2                            | 0.0456  | 0.0044   | 0.0143  | 0.0769  |
| AST                                        | 0.0447  | 0.0052   | 0.0134  | 0.0760  |
| Discharge                                  | 0.0446  | 0.0054   | 0.0132  | 0.0760  |
| Non-seasonal allergies                     | 0.0445  | 0.0053   | 0.0132  | 0.0759  |
| Diverticulitis                             | 0.0432  | 0.0069   | 0.0119  | 0.0745  |
| Floaters                                   | 0.0421  | 0.0084   | 0.0108  | 0.0734  |
| Absolute basophils                         | 0.0417  | 0.0098   | 0.0101  | 0.0734  |
| Ejection fraction at rest                  | 0.0415  | 0.0094   | 0.0102  | 0.0729  |
| Easy bruising or bleeding                  | 0.0354  | 0.0272   | 0.0040  | 0.0667  |
| Medication allergies                       | 0.0345  | 0.0311   | 0.0031  | 0.0658  |
| Epilepsy                                   | 0.0318  | 0.0471   | 0.0004  | 0.0631  |
| Systolic blood pressure                    | 0.0316  | 0.0505   | -0.0001 | 0.0632  |
| Chloride                                   | -0.0308 | 0.0544   | -0.0621 | 0.0006  |
| Nonalcoholic fatty liver disease           | 0.0303  | 0.0578   | -0.0010 | 0.0617  |
| Arrhythmia                                 | 0.0299  | 0.0629   | -0.0016 | 0.0614  |
| RBC count                                  | 0.0296  | 0.0641   | -0.0017 | 0.0610  |
| Kidney or bladder stones                   | -0.0288 | 0.0721   | -0.0601 | 0.0026  |
| Chronic headaches                          | 0.0285  | 0.0746   | -0.0028 | 0.0599  |
| Rheumatoid arthritis                       | 0.0280  | 0.0808   | -0.0034 | 0.0594  |
| Hay fever                                  | 0.0279  | 0.0815   | -0.0035 | 0.0592  |
| Benign prostatic hyperplasia               | 0.0274  | 0.0946   | -0.0047 | 0.0596  |
| Cholesterol                                | -0.0267 | 0.0947   | -0.0581 | 0.0046  |

|                             |         |        |         |        |
|-----------------------------|---------|--------|---------|--------|
| Absolute eosinophils        | 0.0265  | 0.0983 | -0.0049 | 0.0580 |
| Diverticulosis              | 0.0262  | 0.1013 | -0.0051 | 0.0576 |
| Goiter                      | -0.0261 | 0.1034 | -0.0574 | 0.0053 |
| Magnesium                   | -0.0258 | 0.1099 | -0.0574 | 0.0058 |
| Gout                        | 0.0255  | 0.1116 | -0.0059 | 0.0569 |
| LDL                         | -0.0246 | 0.1238 | -0.0560 | 0.0067 |
| Hepatitis C                 | 0.0239  | 0.1373 | -0.0076 | 0.0554 |
| Diastolic blood pressure    | 0.0232  | 0.1467 | -0.0081 | 0.0546 |
| Peripheral vascular disease | 0.0230  | 0.1508 | -0.0084 | 0.0543 |
| Hypercholesterolemia        | 0.0227  | 0.1598 | -0.0089 | 0.0543 |
| Hemoglobin                  | -0.0225 | 0.1601 | -0.0540 | 0.0089 |
| Nonmelanoma skin cancer     | 0.0212  | 0.1869 | -0.0103 | 0.0528 |
| MPV                         | 0.0211  | 0.1861 | -0.0102 | 0.0525 |
| Hearing loss                | 0.0210  | 0.1924 | -0.0106 | 0.0527 |
| Hypothyroidism              | -0.0209 | 0.1930 | -0.0523 | 0.0106 |
| Handgrip                    | -0.0205 | 0.2025 | -0.0522 | 0.0111 |
| Pulmonary embolism          | 0.0194  | 0.2246 | -0.0119 | 0.0508 |
| Cataracts                   | 0.0186  | 0.2549 | -0.0134 | 0.0507 |
| Glaucoma                    | 0.0186  | 0.2477 | -0.0129 | 0.0501 |
| Sodium                      | -0.0167 | 0.2976 | -0.0480 | 0.0147 |
| Pneumonia                   | 0.0166  | 0.3007 | -0.0148 | 0.0479 |
| Potassium                   | -0.0153 | 0.3403 | -0.0466 | 0.0161 |
| Macular degeneration        | 0.0140  | 0.3806 | -0.0173 | 0.0454 |
| Protein (serum)             | -0.0139 | 0.3870 | -0.0454 | 0.0176 |
| Stroke                      | 0.0133  | 0.4058 | -0.0181 | 0.0447 |
| Hemorrhoids                 | 0.0132  | 0.4094 | -0.0182 | 0.0446 |
| Coronary artery disease     | 0.0123  | 0.4424 | -0.0191 | 0.0438 |
| Basophils (% WBC)           | 0.0118  | 0.4593 | -0.0195 | 0.0432 |
| Hematocrit                  | -0.0117 | 0.4667 | -0.0431 | 0.0198 |
| Psoriasis                   | 0.0109  | 0.4946 | -0.0204 | 0.0423 |
| Myocardial infarction       | 0.0104  | 0.5153 | -0.0210 | 0.0418 |
| Eosinophils (% WBC)         | 0.0104  | 0.5158 | -0.0210 | 0.0418 |
| Peptic ulcer                | 0.0102  | 0.5244 | -0.0212 | 0.0416 |
| Breast cancer               | 0.0101  | 0.5287 | -0.0213 | 0.0414 |
| Neutrophil lymphocyte ratio | 0.0100  | 0.5337 | -0.0214 | 0.0413 |
| Melanoma skin cancer        | -0.0099 | 0.5384 | -0.0414 | 0.0216 |
| Calcium                     | -0.0098 | 0.5396 | -0.0412 | 0.0215 |
| Transient ischemic attack   | -0.0090 | 0.5746 | -0.0404 | 0.0224 |
| Coronary calcium score      | -0.0085 | 0.6007 | -0.0401 | 0.0232 |
| Left ventricular mass index | 0.0082  | 0.6113 | -0.0234 | 0.0398 |
| Gallbladder disease         | 0.0081  | 0.6131 | -0.0234 | 0.0397 |
| TSH                         | 0.0081  | 0.6117 | -0.0232 | 0.0395 |
| Tinnitus                    | 0.0081  | 0.6138 | -0.0234 | 0.0397 |
| Osteoporosis                | -0.0081 | 0.6139 | -0.0395 | 0.0233 |
| GFR MDRD                    | 0.0075  | 0.6465 | -0.0247 | 0.0398 |
| Colon polyps                | 0.0074  | 0.6490 | -0.0244 | 0.0391 |
| Hashimotos Disease          | -0.0073 | 0.6467 | -0.0387 | 0.0240 |
| Neutrophil segments (% WBC) | -0.0072 | 0.6530 | -0.0386 | 0.0242 |
| Total neutrophils (% WBC)   | -0.0072 | 0.6530 | -0.0386 | 0.0242 |
| Platelets                   | 0.0059  | 0.7162 | -0.0261 | 0.0380 |
| Atrial fibrillation         | 0.0056  | 0.7273 | -0.0259 | 0.0371 |
| Osteopenia                  | -0.0046 | 0.7748 | -0.0361 | 0.0269 |
| Diabetes type 1             | 0.0039  | 0.8093 | -0.0275 | 0.0352 |
| Lymphocytes (% WBC)         | 0.0038  | 0.8133 | -0.0276 | 0.0351 |
| Hepatitis B                 | 0.0030  | 0.8507 | -0.0284 | 0.0344 |
| Monocytes (% WBC)           | 0.0030  | 0.8543 | -0.0288 | 0.0348 |

|                        |               |               |                |               |
|------------------------|---------------|---------------|----------------|---------------|
| <u>Prostate cancer</u> | <u>0.0030</u> | <u>0.8543</u> | <u>-0.0287</u> | <u>0.0347</u> |
|------------------------|---------------|---------------|----------------|---------------|

LASSO regression model 2 comprised age, sex, age by sex interaction, race, ethnicity, socioeconomic status and health behaviors. The LASSO-predicted value was used to estimate a covariate-adjusted effect for all other candidate variables shown.

ALT, alanine aminotransferase; AST, aspartate aminotransferase; BMI, body mass index; COPD, chronic obstructive pulmonary disease; GFR, glomerular filtration rate; GERD, gastroesophageal reflux disease; HbA1c, hemoglobin A1c; HDL, high density lipoprotein; LASSO, least absolute shrinkage and selection operator; LDL, low density lipoprotein; MCH, mean corpuscular hemoglobin; MCHC, mean corpuscular hemoglobin concentration; MCV, mean corpuscular volume; MDRD, modification of diet in renal disease; RBC, red blood cells; TSH, thyroid-stimulating hormone; WBC, white blood cells.

**eTable 10. LASSO Regression Results: Model 3**

| Variable                             | Estimate | P-value  | CI 25%  | CI 75%  |
|--------------------------------------|----------|----------|---------|---------|
| Tension                              | 0.1847   | < 0.0001 | 0.1543  | 0.2152  |
| Memory change                        | 0.1511   | < 0.0001 | 0.1207  | 0.1816  |
| Body image concerns                  | 0.1457   | < 0.0001 | 0.1154  | 0.1760  |
| Backache                             | 0.1336   | < 0.0001 | 0.1026  | 0.1645  |
| Neck or low back pain                | 0.1191   | < 0.0001 | 0.0881  | 0.1501  |
| Lightheadedness                      | 0.1047   | < 0.0001 | 0.0739  | 0.1355  |
| Shortness of breath with exercise    | 0.1028   | < 0.0001 | 0.0713  | 0.1343  |
| Shortness of breath                  | 0.0976   | < 0.0001 | 0.0657  | 0.1294  |
| Headache                             | 0.0967   | < 0.0001 | 0.0655  | 0.1280  |
| Constipation                         | 0.0932   | < 0.0001 | 0.0627  | 0.1238  |
| Heat or cold intolerance             | 0.0918   | < 0.0001 | 0.0609  | 0.1227  |
| Nasal stuffiness                     | 0.0880   | < 0.0001 | 0.0574  | 0.1185  |
| Waist circumference                  | 0.0834   | < 0.0001 | 0.0528  | 0.1141  |
| BMI                                  | 0.0829   | < 0.0001 | 0.0517  | 0.1142  |
| Swelling in calves or feet           | 0.0816   | < 0.0001 | 0.0508  | 0.1124  |
| 6-minute walk                        | -0.0801  | < 0.0001 | -0.1111 | -0.0491 |
| Bloating                             | 0.0795   | < 0.0001 | 0.0484  | 0.1106  |
| Muscle or joint pain                 | 0.0791   | < 0.0001 | 0.0484  | 0.1098  |
| Frequency of urination               | 0.0786   | < 0.0001 | 0.0482  | 0.1091  |
| Coughing up sputum                   | 0.0781   | < 0.0001 | 0.0471  | 0.1090  |
| 30 second chair stand                | -0.0762  | < 0.0001 | -0.1068 | -0.0455 |
| Pain or stiffness in the neck        | 0.0745   | < 0.0001 | 0.0438  | 0.1053  |
| Joint pain swelling                  | 0.0735   | < 0.0001 | 0.0428  | 0.1041  |
| Tingling or numbness in extremities  | 0.0729   | < 0.0001 | 0.0420  | 0.1037  |
| Heartburn                            | 0.0712   | < 0.0001 | 0.0404  | 0.1021  |
| Night sweats                         | 0.0681   | < 0.0001 | 0.0373  | 0.0988  |
| Urination at night                   | 0.0642   | < 0.0001 | 0.0337  | 0.0946  |
| Cough                                | 0.0631   | < 0.0001 | 0.0320  | 0.0941  |
| Mean daily steps in first 30 days    | -0.0620  | < 0.0001 | -0.0926 | -0.0313 |
| Tingling or pins and needles         | 0.0616   | 0.0001   | 0.0304  | 0.0928  |
| Diarrhea                             | 0.0609   | 0.0001   | 0.0298  | 0.0919  |
| C-reactive protein                   | 0.0604   | 0.0001   | 0.0296  | 0.0913  |
| Urgency                              | 0.0601   | 0.0001   | 0.0295  | 0.0906  |
| Blood glucose                        | 0.0594   | 0.0001   | 0.0288  | 0.0901  |
| Stiffness                            | 0.0591   | 0.0002   | 0.0284  | 0.0899  |
| Leg cramps                           | 0.0588   | 0.0002   | 0.0282  | 0.0893  |
| Mean leg balance time                | -0.0565  | 0.0003   | -0.0870 | -0.0260 |
| ALT                                  | 0.0560   | 0.0003   | 0.0254  | 0.0865  |
| Dryness                              | 0.0556   | 0.0004   | 0.0250  | 0.0863  |
| Heart rate                           | 0.0550   | 0.0006   | 0.0234  | 0.0866  |
| Itching skin                         | 0.0548   | 0.0005   | 0.0240  | 0.0856  |
| Excessive belching or passing of gas | 0.0547   | 0.0005   | 0.0240  | 0.0854  |
| Sit-rise score                       | -0.0526  | 0.0008   | -0.0831 | -0.0220 |
| Sinus pain                           | 0.0525   | 0.0008   | 0.0219  | 0.0832  |
| 10-meter walk speed                  | -0.0525  | 0.0008   | -0.0833 | -0.0217 |
| Oxygen saturation                    | -0.0506  | 0.0012   | -0.0811 | -0.0201 |
| HbA1c                                | 0.0499   | 0.0014   | 0.0193  | 0.0805  |
| Respiratory rate                     | 0.0495   | 0.0016   | 0.0187  | 0.0802  |
| Ejection fraction at rest            | 0.0465   | 0.0028   | 0.0160  | 0.0771  |
| WBC count                            | 0.0462   | 0.0045   | 0.0144  | 0.0781  |

|                                            |         |        |         |         |
|--------------------------------------------|---------|--------|---------|---------|
| Absolute reticulocytes                     | 0.0462  | 0.0033 | 0.0154  | 0.0770  |
| Reticulocytes (% RBC)                      | 0.0461  | 0.0034 | 0.0153  | 0.0770  |
| Dry mouth                                  | 0.0456  | 0.0038 | 0.0148  | 0.0765  |
| Albumin in urine                           | -0.0456 | 0.0034 | -0.0761 | -0.0151 |
| Numbness or loss of sensation              | 0.0441  | 0.0052 | 0.0132  | 0.0751  |
| Ear ringing                                | 0.0422  | 0.0068 | 0.0116  | 0.0727  |
| Food allergies                             | 0.0418  | 0.0072 | 0.0113  | 0.0724  |
| MCH                                        | -0.0413 | 0.0084 | -0.0720 | -0.0106 |
| Runny nose                                 | 0.0389  | 0.0128 | 0.0083  | 0.0695  |
| Cramping                                   | 0.0389  | 0.0147 | 0.0076  | 0.0701  |
| Hemorrhoids (symptom)                      | 0.0386  | 0.0134 | 0.0080  | 0.0691  |
| Days watch worn 10+ hours in first 30 days | -0.0385 | 0.0149 | -0.0696 | -0.0075 |
| Handgrip                                   | -0.0379 | 0.0150 | -0.0685 | -0.0074 |
| MCHC                                       | -0.0378 | 0.0156 | -0.0684 | -0.0072 |
| Urine specific gravity                     | 0.0361  | 0.0222 | 0.0052  | 0.0669  |
| Absolute basophils                         | 0.0352  | 0.0255 | 0.0043  | 0.0660  |
| Urine reaction pH                          | -0.0351 | 0.0243 | -0.0657 | -0.0046 |
| Monocytes                                  | 0.0350  | 0.0253 | 0.0043  | 0.0657  |
| Lymphocytes (total)                        | 0.0350  | 0.0283 | 0.0037  | 0.0663  |
| Triglycerides                              | 0.0347  | 0.0262 | 0.0041  | 0.0654  |
| Discharge                                  | 0.0345  | 0.0273 | 0.0039  | 0.0652  |
| MCV                                        | -0.0338 | 0.0306 | -0.0645 | -0.0032 |
| Neutrophils                                | 0.0331  | 0.0390 | 0.0017  | 0.0645  |
| Floater                                    | 0.0330  | 0.0342 | 0.0025  | 0.0636  |
| Creatinine (urine)                         | 0.0325  | 0.0397 | 0.0015  | 0.0635  |
| AST                                        | 0.0319  | 0.0404 | 0.0014  | 0.0625  |
| Serum creatinine                           | 0.0311  | 0.0465 | 0.0005  | 0.0618  |
| Seasonal allergies                         | 0.0288  | 0.0650 | -0.0018 | 0.0595  |
| Easy bruising or bleeding                  | 0.0272  | 0.0821 | -0.0035 | 0.0578  |
| Vitamin D                                  | -0.0269 | 0.0928 | -0.0583 | 0.0045  |
| Medication allergies                       | 0.0258  | 0.0977 | -0.0047 | 0.0564  |
| Uric acid                                  | 0.0247  | 0.1137 | -0.0059 | 0.0552  |
| Non-seasonal allergies                     | 0.0237  | 0.1300 | -0.0070 | 0.0543  |
| HDL                                        | -0.0229 | 0.1470 | -0.0540 | 0.0081  |
| Hemoglobin                                 | -0.0229 | 0.1427 | -0.0535 | 0.0077  |
| Chloride                                   | -0.0219 | 0.1590 | -0.0525 | 0.0086  |
| Protein (serum)                            | -0.0213 | 0.1737 | -0.0520 | 0.0094  |
| Systolic blood pressure                    | 0.0186  | 0.2348 | -0.0121 | 0.0492  |
| Hay fever                                  | 0.0173  | 0.2677 | -0.0133 | 0.0478  |
| MPV                                        | 0.0154  | 0.3227 | -0.0152 | 0.0460  |
| Absolute eosinophils                       | 0.0147  | 0.3473 | -0.0160 | 0.0455  |
| Hematocrit                                 | -0.0147 | 0.3474 | -0.0453 | 0.0159  |
| Basophils (% WBC)                          | 0.0140  | 0.3691 | -0.0166 | 0.0446  |
| Coronary calcium score                     | -0.0118 | 0.4500 | -0.0426 | 0.0189  |
| RBC count                                  | 0.0109  | 0.4830 | -0.0196 | 0.0415  |
| LDL                                        | -0.0105 | 0.5007 | -0.0411 | 0.0201  |
| GFR MDRD                                   | -0.0087 | 0.5884 | -0.0402 | 0.0228  |
| Diastolic blood pressure                   | 0.0087  | 0.5775 | -0.0219 | 0.0393  |
| Neutrophil lymphocyte ratio                | 0.0079  | 0.6135 | -0.0227 | 0.0384  |
| Sodium                                     | -0.0077 | 0.6218 | -0.0383 | 0.0229  |
| Calcium                                    | -0.0056 | 0.7179 | -0.0362 | 0.0249  |
| Cholesterol                                | -0.0054 | 0.7296 | -0.0360 | 0.0252  |
| Monocytes (% WBC)                          | 0.0038  | 0.8106 | -0.0271 | 0.0346  |
| Neutrophil segments (% WBC)                | -0.0035 | 0.8244 | -0.0340 | 0.0271  |
| Total neutrophils (% WBC)                  | -0.0035 | 0.8244 | -0.0340 | 0.0271  |

|                             |         |        |         |        |
|-----------------------------|---------|--------|---------|--------|
| Platelets                   | 0.0031  | 0.8456 | -0.0280 | 0.0342 |
| Left ventricular mass index | -0.0026 | 0.8673 | -0.0333 | 0.0280 |
| TSH                         | 0.0025  | 0.8751 | -0.0281 | 0.0330 |
| Eosinophils (% WBC)         | 0.0023  | 0.8824 | -0.0283 | 0.0329 |
| Lymphocytes (% WBC)         | 0.0014  | 0.9280 | -0.0292 | 0.0320 |
| Potassium                   | -0.0008 | 0.9588 | -0.0314 | 0.0298 |
| Magnesium                   | -0.0005 | 0.9745 | -0.0316 | 0.0306 |

LASSO regression model 3 comprised age, sex, age by sex interaction, race, ethnicity, socioeconomic status, health behaviors, and medical conditions (except mental health disorder diagnoses or disorders directly related to mental health or depression). The LASSO-predicted value was used to estimate a covariate-adjusted effect for all other candidate variables shown.

ALT, alanine aminotransferase; AST, aspartate aminotransferase; BMI, body mass index; GFR, glomerular filtration rate; GERD, gastroesophageal reflux disease; HbA1c, hemoglobin A1c; HDL, high density lipoprotein; LASSO, least absolute shrinkage and selection operator; LDL, low density lipoprotein; MCH, mean corpuscular hemoglobin; MCHC, mean corpuscular hemoglobin concentration; MCV, mean corpuscular volume; MDRD, modification of diet in renal disease; RBC, red blood cells; TSH, thyroid-stimulating hormone; WBC, white blood cells.

**eTable 11. LASSO Regression Results: Model 4**

| Variable                                   | Estimate | P-value  | CI 25%  | CI 75%  |
|--------------------------------------------|----------|----------|---------|---------|
| BMI                                        | 0.0664   | < 0.0001 | 0.0369  | 0.0960  |
| 6-minute walk                              | -0.0661  | < 0.0001 | -0.0955 | -0.0368 |
| Waist circumference                        | 0.0618   | < 0.0001 | 0.0326  | 0.0910  |
| Mean daily steps in first 30 days          | -0.0522  | 0.0004   | -0.0813 | -0.0232 |
| ALT                                        | 0.0520   | 0.0004   | 0.0230  | 0.0809  |
| Heart rate                                 | 0.0491   | 0.0012   | 0.0195  | 0.0787  |
| 30 second chair stand                      | -0.0458  | 0.0023   | -0.0752 | -0.0164 |
| Blood glucose                              | 0.0454   | 0.0022   | 0.0164  | 0.0745  |
| WBC count                                  | 0.0454   | 0.0028   | 0.0157  | 0.0751  |
| C-reactive protein                         | 0.0431   | 0.0040   | 0.0137  | 0.0724  |
| Absolute reticulocytes                     | 0.0413   | 0.0054   | 0.0122  | 0.0705  |
| Sit-rise score                             | -0.0408  | 0.0058   | -0.0697 | -0.0118 |
| Reticulocytes (% RBC)                      | 0.0401   | 0.0071   | 0.0109  | 0.0692  |
| Handgrip                                   | -0.0399  | 0.0070   | -0.0688 | -0.0109 |
| Mean leg balance time                      | -0.0390  | 0.0083   | -0.0679 | -0.0100 |
| Oxygen saturation                          | -0.0385  | 0.0091   | -0.0675 | -0.0096 |
| AST                                        | 0.0374   | 0.0112   | 0.0085  | 0.0663  |
| Respiratory rate                           | 0.0367   | 0.0138   | 0.0075  | 0.0659  |
| 10-meter walk speed                        | -0.0362  | 0.0154   | -0.0654 | -0.0069 |
| Albumin in urine                           | -0.0361  | 0.0146   | -0.0651 | -0.0071 |
| Days watch worn 10+ hours in first 30 days | -0.0360  | 0.0157   | -0.0653 | -0.0068 |
| Lymphocytes (total)                        | 0.0354   | 0.0181   | 0.0060  | 0.0648  |
| HbA1c                                      | 0.0352   | 0.0177   | 0.0061  | 0.0643  |
| Ejection fraction at rest                  | 0.0351   | 0.0173   | 0.0062  | 0.0641  |
| Neutrophils                                | 0.0350   | 0.0200   | 0.0055  | 0.0644  |
| MCHC                                       | -0.0341  | 0.0212   | -0.0631 | -0.0051 |
| MCH                                        | -0.0301  | 0.0428   | -0.0592 | -0.0010 |
| Monocytes                                  | 0.0282   | 0.0577   | -0.0009 | 0.0572  |
| Absolute basophils                         | 0.0270   | 0.0702   | -0.0022 | 0.0562  |
| Triglycerides                              | 0.0267   | 0.0716   | -0.0023 | 0.0557  |
| Urine reaction pH                          | -0.0265  | 0.0734   | -0.0554 | 0.0025  |
| MCV                                        | -0.0223  | 0.1333   | -0.0513 | 0.0068  |
| Sodium                                     | -0.0220  | 0.1359   | -0.0510 | 0.0069  |
| Chloride                                   | -0.0211  | 0.1537   | -0.0500 | 0.0079  |
| Serum creatinine                           | 0.0203   | 0.1701   | -0.0087 | 0.0492  |
| MPV                                        | 0.0189   | 0.2015   | -0.0101 | 0.0478  |
| Potassium                                  | -0.0185  | 0.2097   | -0.0475 | 0.0104  |
| Urine specific gravity                     | 0.0179   | 0.2308   | -0.0114 | 0.0473  |
| Vitamin D                                  | -0.0166  | 0.2713   | -0.0462 | 0.0130  |
| Systolic blood pressure                    | 0.0165   | 0.2654   | -0.0125 | 0.0455  |
| LDL                                        | -0.0158  | 0.2837   | -0.0448 | 0.0131  |
| Protein (serum)                            | -0.0145  | 0.3256   | -0.0435 | 0.0145  |
| RBC count                                  | 0.0144   | 0.3285   | -0.0145 | 0.0434  |
| Creatinine (urine)                         | 0.0140   | 0.3518   | -0.0154 | 0.0434  |
| Basophils (% WBC)                          | 0.0119   | 0.4208   | -0.0171 | 0.0408  |
| Left ventricular mass index                | -0.0114  | 0.4391   | -0.0404 | 0.0175  |
| Uric acid                                  | 0.0111   | 0.4506   | -0.0178 | 0.0401  |
| Coronary calcium score                     | -0.0108  | 0.4681   | -0.0398 | 0.0183  |
| TSH                                        | 0.0102   | 0.4912   | -0.0188 | 0.0391  |
| Hemoglobin                                 | -0.0095  | 0.5236   | -0.0385 | 0.0196  |
| Magnesium                                  | -0.0074  | 0.6195   | -0.0366 | 0.0218  |



|                             |         |        |         |        |
|-----------------------------|---------|--------|---------|--------|
| Diastolic blood pressure    | 0.0064  | 0.6651 | -0.0226 | 0.0354 |
| Eosinophils (% WBC)         | -0.0057 | 0.7011 | -0.0346 | 0.0233 |
| GFR MDRD                    | -0.0054 | 0.7173 | -0.0349 | 0.0241 |
| Neutrophil lymphocyte ratio | 0.0053  | 0.7185 | -0.0236 | 0.0343 |
| Calcium                     | -0.0049 | 0.7398 | -0.0339 | 0.0240 |
| Platelets                   | 0.0039  | 0.7947 | -0.0254 | 0.0331 |
| Cholesterol                 | -0.0034 | 0.8172 | -0.0324 | 0.0256 |
| HDL                         | -0.0027 | 0.8565 | -0.0322 | 0.0267 |
| Monocytes (% WBC)           | 0.0025  | 0.8652 | -0.0266 | 0.0317 |
| Absolute eosinophils        | 0.0017  | 0.9082 | -0.0274 | 0.0309 |
| Lymphocytes (% WBC)         | 0.0015  | 0.9192 | -0.0275 | 0.0305 |
| Neutrophil segments (% WBC) | -0.0013 | 0.9307 | -0.0302 | 0.0277 |
| Total neutrophils (% WBC)   | -0.0013 | 0.9307 | -0.0302 | 0.0277 |
| Hematocrit                  | -0.0011 | 0.9413 | -0.0301 | 0.0279 |

LASSO regression model 4 comprised age, sex, age by sex interaction, race, ethnicity, socioeconomic status, health behaviors, medical conditions (except mental health disorder diagnoses or disorders directly related to mental health or depression), symptoms (except those that are directly related to mental health or depression), and allergies. The LASSO-predicted value was used to estimate a covariate-adjusted effect for all other candidate variables shown.

ALT, alanine aminotransferase; AST, aspartate aminotransferase; BMI, body mass index; GFR, glomerular filtration rate; GERD, gastroesophageal reflux disease; HbA1c, hemoglobin A1c; HDL, high density lipoprotein; LASSO, least absolute shrinkage and selection operator; LDL, low density lipoprotein; MCH, mean corpuscular hemoglobin; MCHC, mean corpuscular hemoglobin concentration; MCV, mean corpuscular volume; MDRD, modification of diet in renal disease; RBC, red blood cells; TSH, thyroid-stimulating hormone; WBC, white blood cells.

**eTable 12. LASSO Regression Results: Model 5**

| Variable                    | Estimate | P-value | CI 25%  | CI 75% |
|-----------------------------|----------|---------|---------|--------|
| AST                         | 0.0382   | 0.0087  | 0.0096  | 0.0667 |
| ALT                         | 0.0352   | 0.0162  | 0.0065  | 0.0638 |
| HDL                         | 0.0312   | 0.0383  | 0.0017  | 0.0607 |
| Serum creatinine            | 0.0220   | 0.1313  | -0.0066 | 0.0506 |
| LDL                         | -0.0212  | 0.1460  | -0.0497 | 0.0074 |
| Blood glucose               | 0.0207   | 0.1606  | -0.0082 | 0.0497 |
| MCHC                        | -0.0199  | 0.1747  | -0.0486 | 0.0088 |
| Basophils (% WBC)           | 0.0183   | 0.2085  | -0.0102 | 0.0469 |
| Chloride                    | -0.0183  | 0.2099  | -0.0468 | 0.0103 |
| MPV                         | 0.0181   | 0.2145  | -0.0105 | 0.0467 |
| Sodium                      | -0.0179  | 0.2203  | -0.0464 | 0.0107 |
| Absolute basophils          | 0.0170   | 0.2479  | -0.0119 | 0.0460 |
| Protein (serum)             | -0.0169  | 0.2471  | -0.0455 | 0.0117 |
| MCH                         | -0.0148  | 0.3137  | -0.0437 | 0.0140 |
| Potassium                   | -0.0143  | 0.3259  | -0.0429 | 0.0143 |
| GFR MDRD                    | -0.0138  | 0.3535  | -0.0430 | 0.0154 |
| Lymphocytes (total)         | 0.0133   | 0.3748  | -0.0160 | 0.0425 |
| Platelets                   | -0.0127  | 0.3923  | -0.0417 | 0.0164 |
| WBC count                   | 0.0125   | 0.4143  | -0.0175 | 0.0424 |
| Monocytes                   | 0.0121   | 0.4122  | -0.0168 | 0.0409 |
| C-reactive protein          | 0.0104   | 0.4880  | -0.0190 | 0.0398 |
| Monocytes (% WBC)           | 0.0103   | 0.4818  | -0.0185 | 0.0391 |
| HbA1c                       | 0.0101   | 0.4930  | -0.0188 | 0.0391 |
| MCV                         | -0.0101  | 0.4933  | -0.0388 | 0.0187 |
| TSH                         | 0.0100   | 0.4930  | -0.0186 | 0.0386 |
| Albumin in urine            | -0.0096  | 0.5130  | -0.0383 | 0.0192 |
| Magnesium                   | 0.0095   | 0.5205  | -0.0195 | 0.0385 |
| Uric acid                   | -0.0080  | 0.5827  | -0.0366 | 0.0206 |
| RBC count                   | 0.0073   | 0.6161  | -0.0213 | 0.0359 |
| Urine reaction pH           | -0.0073  | 0.6185  | -0.0360 | 0.0214 |
| Neutrophil segments (% WBC) | -0.0072  | 0.6205  | -0.0358 | 0.0214 |
| Total neutrophils (% WBC)   | -0.0072  | 0.6205  | -0.0358 | 0.0214 |
| Absolute reticulocytes      | 0.0069   | 0.6408  | -0.0222 | 0.0361 |
| Neutrophils                 | 0.0068   | 0.6483  | -0.0226 | 0.0363 |
| Absolute eosinophils        | -0.0064  | 0.6635  | -0.0352 | 0.0224 |
| Calcium                     | 0.0062   | 0.6691  | -0.0224 | 0.0348 |
| Vitamin D                   | 0.0057   | 0.7024  | -0.0237 | 0.0352 |
| Lymphocytes (% WBC)         | 0.0057   | 0.6944  | -0.0229 | 0.0343 |
| Reticulocytes (% RBC)       | 0.0057   | 0.7017  | -0.0235 | 0.0349 |
| Triglycerides               | 0.0055   | 0.7075  | -0.0233 | 0.0343 |
| Eosinophils (% WBC)         | -0.0047  | 0.7449  | -0.0333 | 0.0238 |
| Hemoglobin                  | -0.0047  | 0.7481  | -0.0334 | 0.0240 |
| Cholesterol                 | -0.0033  | 0.8231  | -0.0319 | 0.0254 |
| Urine specific gravity      | -0.0029  | 0.8465  | -0.0321 | 0.0263 |
| Neutrophil lymphocyte ratio | -0.0009  | 0.9488  | -0.0295 | 0.0276 |
| Creatinine (urine)          | 0.0006   | 0.9663  | -0.0285 | 0.0298 |
| Hematocrit                  | 0.0000   | 0.9974  | -0.0286 | 0.0287 |

LASSO regression model 5 comprised age, sex, age by sex interaction, race, ethnicity, socioeconomic status, health behaviors, medical conditions (except mental health disorder diagnoses or disorders directly related to mental health or depression), symptoms (except those that are directly related to mental health or depression), allergies, and physical function. The LASSO-predicted value was used to estimate a covariate-adjusted effect for all other candidate variables shown.

ALT, alanine aminotransferase; AST, aspartate aminotransferase; GFR, glomerular filtration rate; GERD, gastroesophageal reflux disease; HbA1c, hemoglobin A1c; HDL, high density lipoprotein; LASSO, least absolute shrinkage and selection operator; LDL, low density lipoprotein; MCH, mean corpuscular hemoglobin; MCHC, mean corpuscular hemoglobin concentration; MCV, mean corpuscular volume; MDRD, modification of diet in renal disease; RBC, red blood cells; TSH, thyroid-stimulating hormone; WBC, white blood cells.

**eFigure 1. Distribution of PHQ-9 Score Across Risk Groups by Asthma**

Risk groups were created based on the LASSO-predicted value using LASSO Model 1 (age, sex, age x sex interaction) and Model 2 (race, ethnicity, socioeconomic-related variables and health behaviors). "High risk" was defined as the top 50% of the predicted value, while "low risk" was defined as the bottom 50% of the predicted value. LASSO, least absolute shrinkage and selection operator; PHQ-9, Patient Health Questionnaire-9.

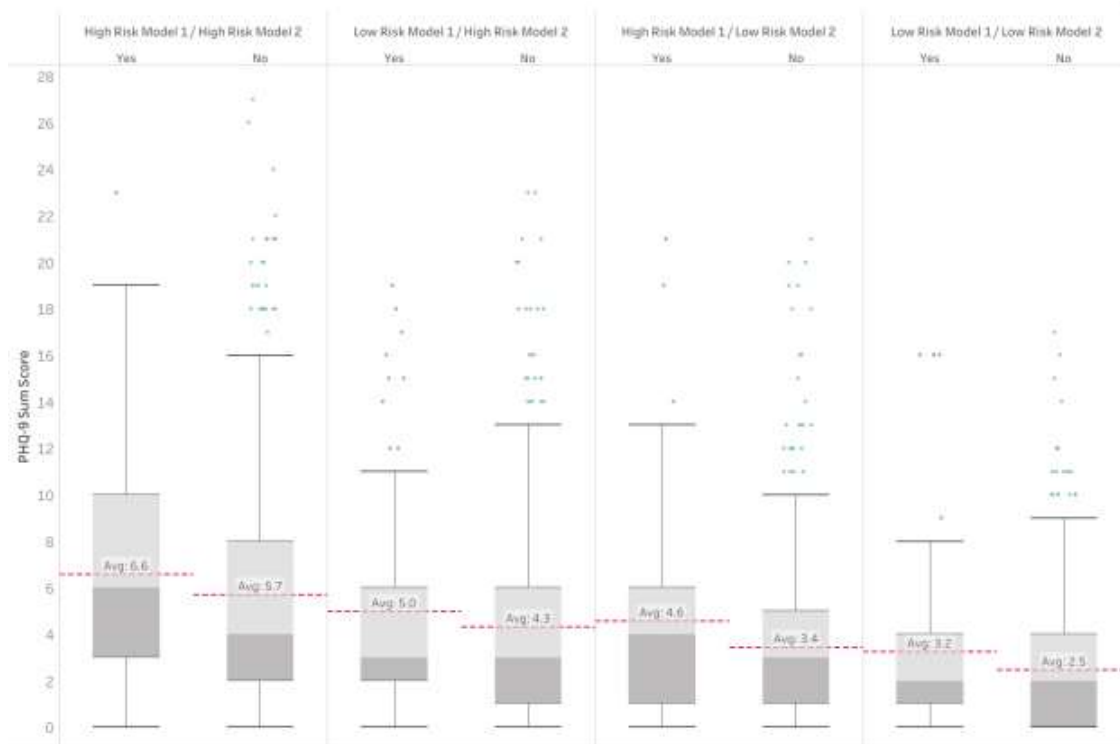

**eFigure 2. Distribution of PHQ-9 Score Across Risk Groups by Backache**

Risk groups were created based on the LASSO-predicted value using LASSO Model 1 (age, sex, age x sex interaction) and Model 2 (race, ethnicity, socioeconomic-related variables and health behaviors). “High risk” was defined as the top 50% of the predicted value, while “low risk” was defined as the bottom 50% of the predicted value. LASSO, least absolute shrinkage and selection operator; PHQ-9, Patient Health Questionnaire-9.

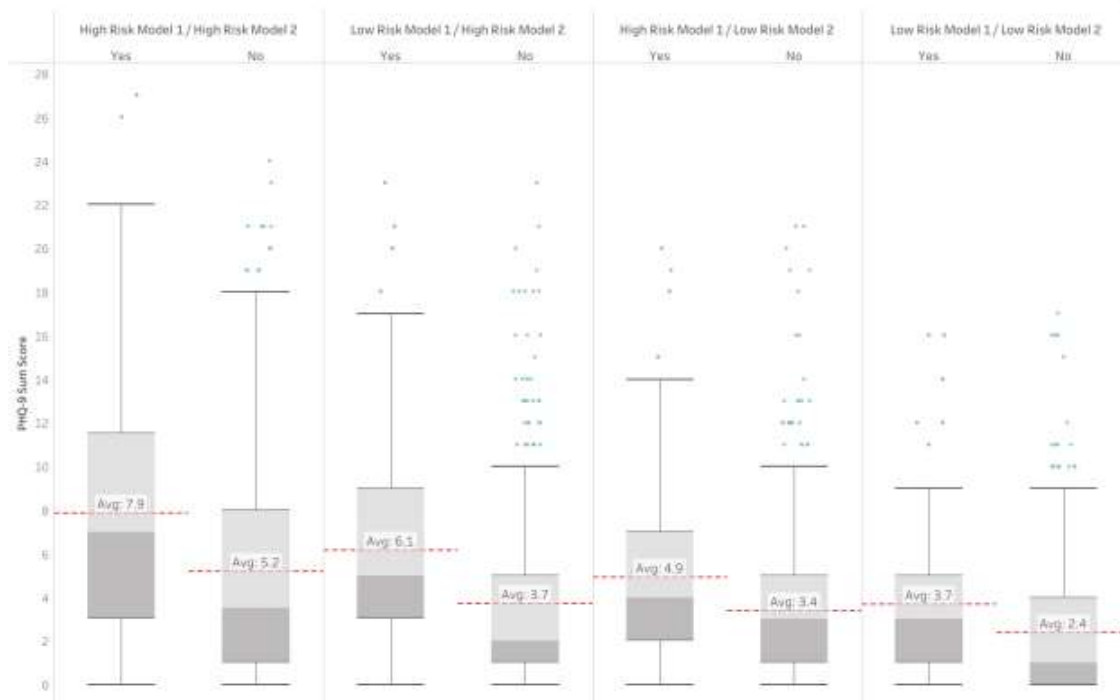

**eFigure 3. Distribution of PHQ-9 Score Across Risk Groups by Memory Change**  
Risk groups were created based on the LASSO-predicted value using LASSO Model 1 (age, sex, age x sex interaction) and Model 2 (race, ethnicity, socioeconomic-related variables and health behaviors). “High risk” was defined as the top 50% of the predicted value, while “low risk” was defined as the bottom 50% of the predicted value. LASSO, least absolute shrinkage and selection operator; PHQ-9, Patient Health Questionnaire-9.

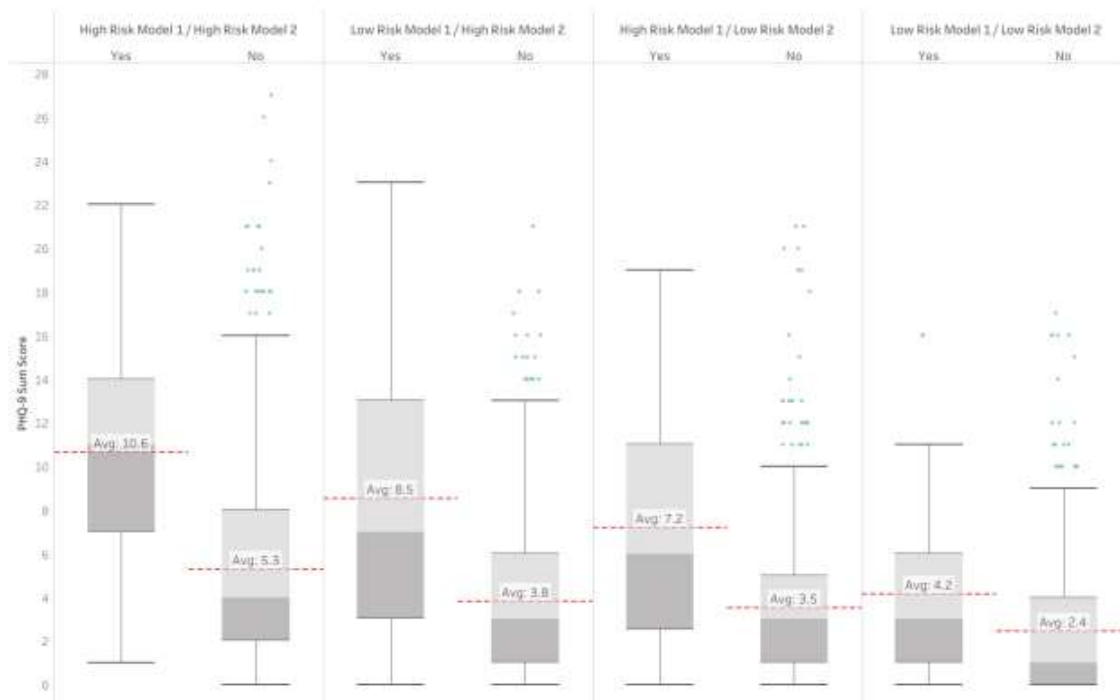

**eFigure 4. Distribution of PHQ-9 Score Across Risk Groups by Body Image Concerns**

Risk groups were created based on the LASSO-predicted value using LASSO Model 1 (age, sex, age x sex interaction) and Model 2 (race, ethnicity, socioeconomic-related variables and health behaviors). “High risk” was defined as the top 50% of the predicted value, while “low risk” was defined as the bottom 50% of the predicted value. LASSO, least absolute shrinkage and selection operator; PHQ-9, Patient Health Questionnaire-9.

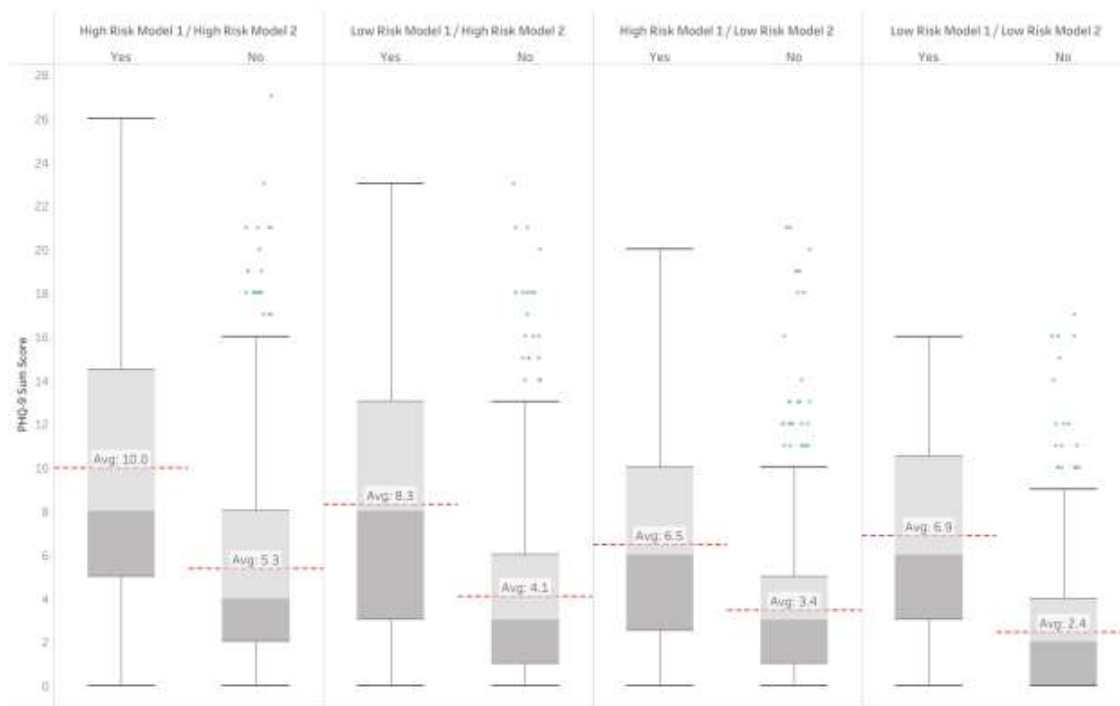

**eFigure 5. Distribution of PHQ-9 Score Across Risk Groups by Sleep Apnea**  
Risk groups were created based on the LASSO-predicted value using LASSO Model 1 (age, sex, age x sex interaction) and Model 2 (race, ethnicity, socioeconomic-related variables and health behaviors). “High risk” was defined as the top 50% of the predicted value, while “low risk” was defined as the bottom 50% of the predicted value. LASSO, least absolute shrinkage and selection operator; PHQ-9, Patient Health Questionnaire-9.

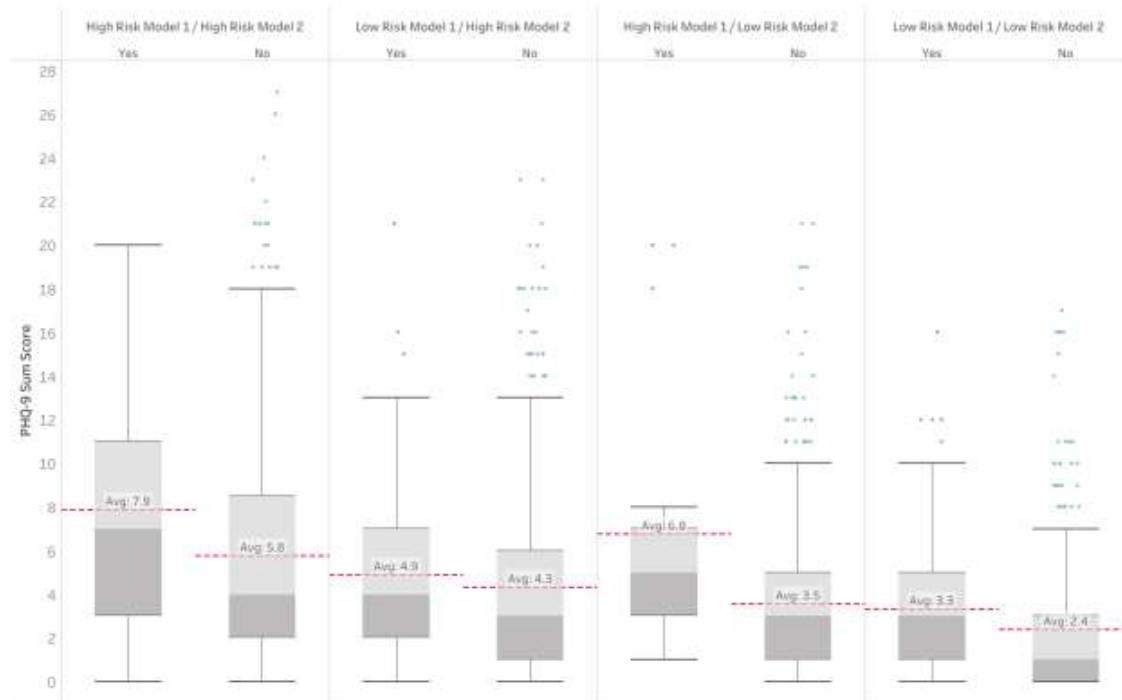

Supplement: bmjopen-2021-054741supp001.pdf [file bmjopen-2021-054741supp001.pdf]
