# Supplementary material for: Biological and clinical correlates of the patient health questionnaire-9: exploratory cross-sectional analyses of the baseline health study
Source: PubMed Central journal article supplement — BMJ Open. 2022 Jan 4;12(1):e054741. doi: 10.1136/bmjopen-2021-054741 (PMC8728408; doi:10.1136/bmjopen-2021-054741), 2022-01-04
Supplement: bmjopen-2021-054741.draft_revisions.pdf [file bmjopen-2021-054741.draft_revisions.pdf]

# BMJ Open

BMJ Open is committed to open peer review. As part of this commitment we make the peer review history of every article we publish publicly available.

When an article is published we post the peer reviewers' comments and the authors' responses online. We also post the versions of the paper that were used during peer review. These are the versions that the peer review comments apply to.

The versions of the paper that follow are the versions that were submitted during the peer review process. They are not the versions of record or the final published versions. They should not be cited or distributed as the published version of this manuscript.

BMJ Open is an open access journal and the full, final, typeset and author-corrected version of record of the manuscript is available on our site with no access controls, subscription charges or pay-per-view fees (<http://bmjopen.bmj.com>).

If you have any questions on BMJ Open's open peer review process please email [info.bmjopen@bmj.com](mailto:info.bmjopen@bmj.com)

# BMJ Open

## Biological and Clinical Correlates of the Patient Health Questionnaire-9

|                               |                                                                                                                                                                                                                                                                                                                                                                                                       |
|-------------------------------|-------------------------------------------------------------------------------------------------------------------------------------------------------------------------------------------------------------------------------------------------------------------------------------------------------------------------------------------------------------------------------------------------------|
| Journal:                      | <i>BMJ Open</i>                                                                                                                                                                                                                                                                                                                                                                                       |
| Manuscript ID                 | bmjopen-2021-054741                                                                                                                                                                                                                                                                                                                                                                                   |
| Article Type:                 | Original research                                                                                                                                                                                                                                                                                                                                                                                     |
| Date Submitted by the Author: | 23-Jun-2021                                                                                                                                                                                                                                                                                                                                                                                           |
| Complete List of Authors:     | Califf, Robert; Verily Life Sciences LLC<br>Wong, Celeste; Verily Life Sciences LLC<br>Doraiswamy, Murali; Duke University Medical Center, Psychiatry; Duke University Medical Center, Brain Sciences<br>Hong, David ; Stanford University School of Medicine, Department of Psychiatry and Behavioral Sciences<br>Miller, David; Verily Life Sciences LLC<br>Mega, Jessica; Verily Life Sciences LLC |
| Keywords:                     | MENTAL HEALTH, PUBLIC HEALTH, Depression & mood disorders < PSYCHIATRY, Anxiety disorders < PSYCHIATRY                                                                                                                                                                                                                                                                                                |
|                               |                                                                                                                                                                                                                                                                                                                                                                                                       |

SCHOLARONE™  
Manuscripts

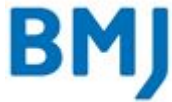

I, the Submitting Author has the right to grant and does grant on behalf of all authors of the Work (as defined in the below author licence), an exclusive licence and/or a non-exclusive licence for contributions from authors who are: i) UK Crown employees; ii) where BMJ has agreed a CC-BY licence shall apply, and/or iii) in accordance with the terms applicable for US Federal Government officers or employees acting as part of their official duties; on a worldwide, perpetual, irrevocable, royalty-free basis to BMJ Publishing Group Ltd ("BMJ") its licensees and where the relevant Journal is co-owned by BMJ to the co-owners of the Journal, to publish the Work in this journal and any other BMJ products and to exploit all rights, as set out in our [licence](#).

The Submitting Author accepts and understands that any supply made under these terms is made by BMJ to the Submitting Author unless you are acting as an employee on behalf of your employer or a postgraduate student of an affiliated institution which is paying any applicable article publishing charge ("APC") for Open Access articles. Where the Submitting Author wishes to make the Work available on an Open Access basis (and intends to pay the relevant APC), the terms of reuse of such Open Access shall be governed by a Creative Commons licence – details of these licences and which [Creative Commons](#) licence will apply to this Work are set out in our licence referred to above.

Other than as permitted in any relevant BMJ Author's Self Archiving Policies, I confirm this Work has not been accepted for publication elsewhere, is not being considered for publication elsewhere and does not duplicate material already published. I confirm all authors consent to publication of this Work and authorise the granting of this licence.

**ORIGINAL RESEARCH****Biological and Clinical Correlates of the Patient Health Questionnaire-9****Running title:** Biological and Clinical Correlates of PHQ-9Robert M. Califf, MD<sup>1</sup>; Celeste Wong, MPH<sup>1</sup>; P. Murali Doraiswamy, MBBS<sup>2</sup>;David S. Hong, MD<sup>3</sup>; David P. Miller, MS<sup>1</sup>; Jessica L. Mega, MD, MPH<sup>1</sup>; for the Baseline Study Group<sup>1</sup>Verily Life Sciences, San Francisco, CA; <sup>2</sup>Department of Psychiatry and Behavioral Sciences and the Duke Institute for Brain Sciences, Duke University School of Medicine, Durham, NC;<sup>3</sup>Department of Psychiatry and Behavioral Sciences, Stanford University School of Medicine, Stanford, CA.**Address for correspondence:** Robert M. Califf, MD; Verily Life Sciences, 269 E Grand Ave., South San Francisco, CA 94080; Email: [robert.califf@duke.edu](mailto:robert.califf@duke.edu)**Number of references:** 37**Number of tables:** 3**Number of figures:** 1**Number of appendices:** 1 (7 eTables, 1 eFigure w/5 parts)**Text word count:** 2492**Abstract word count:** 247**Key words:** Patient Health Questionnaire-9; measures of health and disease; effective clinical intervention

## ABSTRACT

**Objectives:** The most common screening tool for depression is the Patient Health Questionnaire-9 (PHQ-9). We assessed the relationship between the PHQ-9 at intake and other measurements intended to assess biological factors, markers of disease, and health status.

**Design, setting, and participants:** We performed a cross-sectional analysis of 2365 participants from the Baseline Health Study (BHS), a prospective cohort of adults selected to represent major demographic groups in the United States. Participants underwent deep phenotyping on demographic, clinical, laboratory, functional, and imaging findings.

**Importance:** Despite extensive research on the clinical implications of the PHQ-9, data are limited on the relationship between PHQ-9 scores and other measures of health and disease; this study seeks to better understand this relationship.

**Interventions:** None.

**Main outcomes and measures:** Cross-sectional measures of medical illnesses, gait, balance strength, activities of daily living, imaging, and laboratory tests.

**Results:** Higher PHQ-9 scores were associated with female sex, younger participants, and those with compromised physical status and chronic conditions. Within physical health, increasing PHQ-9 score was associated with a higher frequency of many comorbidities and active symptoms.

**Conclusions:** BHS data confirm findings in the literature regarding the relationship between PHQ-9 and measures of chronic disease, psychological well-being, social well-being, socioeconomic status, and poor physical performance. Our study highlights how even subthreshold depressive symptoms (measured by PHQ-9) may serve as an entree into a variety of

1  
2  
3 individual- and population-level concerns that demand more attention. Furthermore, our findings  
4  
5 underscore that depression should be considered a comorbidity in common disease.  
6  
7

8 **Clinical trial registration:** <https://clinicaltrials.gov/ct2/show/NCT03154346>  
9  
10  
11  
12  
13  
14  
15  
16  
17  
18  
19  
20  
21  
22  
23  
24  
25  
26  
27  
28  
29  
30  
31  
32  
33  
34  
35  
36  
37  
38  
39  
40  
41  
42  
43  
44  
45  
46  
47  
48  
49  
50  
51  
52  
53  
54  
55  
56  
57  
58  
59  
60

## ARTICLE SUMMARY

### Strengths and limitations of this study

- This study included deep phenotyping on demographic, clinical, laboratory, functional, and imaging findings of 2365 participants from the Baseline Health Study (BHS).
- This study provides important data on the relationship between PHQ-9 scores and other measures of health and disease.
- The cross-sectional nature of this study limits our ability to assess the time course of these findings; however, follow-up is currently accruing.
- People with significant depression are less likely to volunteer, thereby limiting the breadth of depression observed in this study.
- The study population is generally representative of adult age, sex, race, and ethnicity, but it is not a fully representative sample of the population.

1  
2  
3 Depression is a complex, chronic condition that affects hundreds of millions of people  
4 worldwide.<sup>1</sup> Bidirectional relationships have been reported between depression and many  
5  
6 chronic illnesses<sup>2</sup>; however, most studies have focused on specific conditions, such as diabetes,  
7  
8 stroke, or congestive heart failure, as opposed to a multidimensional deep phenotyping approach.  
9  
10 Findings from previous studies highlight the need to more fully characterize the relationship  
11  
12 between depression and physical health. Furthermore, it would be helpful to better understand  
13  
14 whether these relationships exist only above a certain threshold or across the entire continuum.  
15  
16

17  
18  
19 The most common screening tool for depression is the Patient Health Questionnaire-9  
20  
21 (PHQ-9), whose operating characteristics are well known<sup>3</sup> and have been validated in a variety  
22  
23 of contexts.<sup>4,5</sup> Despite extensive research on the clinical and behavioral implications of PHQ-9,<sup>6,7</sup>  
24  
25 the results of this questionnaire are often used in a dichotomous manner (e.g., cut-off of 10)  
26  
27 without evaluating the full relationship between PHQ-9 scores and measures of health and  
28  
29 disease.  
30  
31

32  
33 The Baseline Health Study (BHS)<sup>8</sup> is a prospective cohort study of an adult population  
34  
35 selected to represent major demographic groups in the U.S. In BHS, deep phenotyping of  
36  
37 numerous demographic, clinical, laboratory, functional, and imaging findings is coupled with  
38  
39 ongoing longitudinal follow-up. The purpose of our study was to assess the relationship between  
40  
41 the entire spectrum of depression, measured by PHQ-9, and a broad array of measurements  
42  
43 intended to assess health status.  
44  
45  
46  
47  
48

## 49 **METHODS**

### 50 **The Baseline Health Study**



1  
2  
3 BHS methods have been previously described,<sup>8,9</sup> including entry and exclusion criteria, the  
4 institutional review board and participant consent procedures, the data collection scheme, and  
5 key components of study procedures. Additional details of the effects of social determinants on  
6 health in the BHS study have been previously reported.<sup>9</sup> BHS is enrolling a large number of  
7 participants, beginning with intensive measurement of the first 2502 people (the deeply  
8 phenotyped cohort) in whom a large volume of multimodal data are collected. Four clinical BHS  
9 sites in the U.S. have begun enrollment.

10  
11  
12  
13  
14  
15  
16  
17  
18  
19 The participants were enrolled through a virtual online registry with selection of  
20 participants for the deep phenotyping cohort included in this report using an algorithm intended  
21 to produce a representative sample of U.S. adult age, race, and ethnicity. People in good health  
22 and with medical conditions were included and the sampling method was designed to over-  
23 represent people at risk of heart disease or cancer. The PHQ-9 in this report was collected at the  
24 initial study visit in person or online.

25  
26  
27  
28  
29  
30  
31  
32  
33 A pre-BHS pilot study, which tested clinical assessment workflows, was conducted in  
34 200 healthy participants prior to initiation of the primary study. BHS is funded by Verily (San  
35 Francisco, CA) and is managed in collaboration with Stanford University (Stanford, CA), Duke  
36 University (Durham, NC), and the California Health and Longevity Institute (Westlake Village,  
37 CA) with enrolling sites in Durham, NC; Kannapolis, NC; Los Angeles, CA; and Palo Alto, CA.  
38  
39  
40  
41  
42  
43  
44  
45  
46  
47  
48  
49  
50  
51  
52  
53  
54  
55  
56  
57  
58  
59  
60  
The extended studies have governance approaches specific to the needs of each study. Herein,  
we examine a cross-sectional analysis of the first BHS time point PHQ-9 scores.

## Statistical methods

1  
2  
3 The statistical methods used in this manuscript have been described previously.<sup>9</sup> Distributional  
4 measures; medians and 25th, 75th percentiles for continuous variables; and counts and  
5 percentages for categorical variables were computed and summarized across each of 5 PHQ-9  
6 severity groups<sup>3</sup> (0, 1–4, 5–9, 10–14, >14), divided by convention to be consistent with prior  
7 studies. The Cochran-Armitage trend test for binomial variables,<sup>10,11</sup> and the Spearman rank  
8 correlation test for continuous variables<sup>12</sup> or categorical variables that are ordinal in nature (e.g.,  
9 education and income), were used to test for linear trend across severity group. Multiple tests  
10 were not adjusted for, given the exploratory nature of this study. Subsequent studies with pre-  
11 planned hypotheses are needed to confirm results.

12  
13  
14  
15  
16  
17  
18  
19  
20  
21  
22  
23  
24  
25  
26  
27  
28  
29  
30  
31  
32  
33  
34  
35  
36  
37  
38  
39  
40  
41  
42  
43  
44  
45  
46  
47  
48  
49  
50  
51  
52  
53  
54  
55  
56  
57  
58  
59  
60  
Penalized regression using the least absolute shrinkage and selection operator (LASSO)  
was conducted to model physical, phenotypic, and symptom factors that could predict the PHQ-9  
score (logarithm of PHQ-9 + 1). Data were randomly split into a training set (approximately 70%  
of the data), which was used to build the models, and an independent test set, which was used to  
evaluate model performance. The final linear model was trained on the full training set, retaining  
all predictors with coefficients not equal to zero, and was evaluated on the held-aside test set.

Since inference rather than prediction is the goal of this analysis, we considered 5 sets of  
sequential “adjustment” models, consisting of smaller-to-larger covariate lists that were entered  
into a LASSO regression model. The LASSO-predicted values resulting from each of the 5  
models were used to estimate a covariate-adjusted effect for all other candidate variables.  
Separate regressions for *each* of the candidate variables that are not included in a given model  
were performed to obtain coefficients and confidence intervals (i.e., only the LASSO-predicted  
value and the candidate variable to be evaluated were included in each model).

1  
2  
3 The LASSO adjustment models comprise the following covariates: 1) Model 1: age, sex,  
4 and age  $\times$  sex interaction; 2) Model 2: variables from Model 1, plus race and ethnicity,  
5 socioeconomic-related variables (highest education completed, household income, marital status,  
6 employment status, and health insurance), and behavioral-related variables (smoking status,  
7 pack-years smoked, and the Alcohol Use Disorders Identification Test-Consumption [AUDIT-C]  
8 sum score); 3) Model 3: variables from Model 2 plus medical conditions except mental health  
9 disorder diagnoses or disorders directly related to mental health or depression (major depressive  
10 disorder, generalized anxiety disorder, attention deficit hyperactivity disorder, post-traumatic  
11 stress disorder, bipolar disorder, alcohol abuse, drug abuse, and concussion or loss of  
12 consciousness); 4) Model 4: variables from Model 3, plus symptoms and allergies, except those  
13 symptoms that are directly related to mental health or depression (i.e., nervousness, mood  
14 changes, fatigue, lack of energy, change in sleep patterns, change in appetite, and difficulty  
15 concentrating); and 5) Model 5: variables from Model 4, plus all physical health metrics. The  
16 key variables included in each covariate model can be found in **eTable 1**.

17  
18  
19 Since LASSO regression techniques require an input dataset with complete data, missing  
20 data were addressed using iterative regression-based imputation, where predictors were first  
21 grouped by data type, then the groups were rank-ordered by the most missing to the least missing  
22 data. The rank of the whole group was based on the amount of missingness of the majority  
23 ( $\geq 50\%$ ) of the fields within that group), and then at each imputation step, the grouped predictors  
24 were used in a regression model to predict the missing data. The PHQ-9 score was imputed in the  
25 last step along with other patient-reported outcome scores and, therefore, all 2502 participants  
26 were included in the LASSO models.  
27  
28  
29  
30  
31  
32  
33  
34  
35  
36  
37  
38  
39  
40  
41  
42  
43  
44  
45  
46  
47  
48  
49  
50  
51  
52  
53  
54  
55  
56  
57  
58  
59  
60

To summarize key model findings adjusted for known demographic and socioeconomic-related risk factors of PHQ-9, 4 groups were created based on the LASSO-predicted value using Model 1 (age, sex, and age  $\times$  sex interaction) and Model 2 (race, ethnicity, socioeconomic-related variables and health behaviors). For both models, “high risk” was defined as the top 50% of the predicted value, while “low risk” was defined as the bottom 50% of the predicted value. The 2 risk groups from each model were combined to create the following 4 groups: 1) high risk Model 1 + high risk Model 2; 2) high risk Model 1 + low risk Model 2; 3) low risk Model 1 + high risk Model 2; and 4) low risk Model 1 + low risk Model 2.

### **Patient and public involvement statement**

From the beginning, BHS has used participant and community engagement methods. Participants have been involved in feedback sessions, and return of results is a commitment of the project. Community meetings have also been held to assure broad feedback on the goals and conduct of the project.

### **RESULTS**

The relationship between the PHQ-9 score and key demographic characteristics and vital signs is shown in **Table 1**. Younger participants, women, people of color, and those of Hispanic ethnicity had higher PHQ-9 scores. While no difference was observed in blood pressure or temperature, higher PHQ-9 scores were found in participants with higher resting heart rates, larger body mass index, greater waist circumference, and higher respiratory rates.

PHQ-9 scores as a function of medical history and symptoms are shown in **Table 2** and **eTable 2**. As expected, participants with other chronic conditions, particularly gastroesophageal

1  
2  
3 reflux disease, anxiety, and asthma, had higher PHQ-9 scores. A history of diagnosed depression  
4 was highly correlated with elevated PHQ-9. Various symptoms were evident in participants with  
5 higher PHQ-9 scores, with musculoskeletal, mood, and anxiety symptoms proving particularly  
6 prominent.  
7  
8  
9  
10

11  
12 **Table 3** demonstrates the relationship between measures of physical performance and  
13 PHQ-9; differences in 6-minute walk distance, handgrip strength, leg balance, chair stand, and  
14 mean steps are particularly associated with higher PHQ-9.  
15  
16  
17

18  
19 The interplay of higher PHQ-9 score predictors based on the LASSO regression is shown  
20 in **Figure 1**. Model performance was similar between the training and test sets for each model  
21 (Model 1:  $R^2 = 0.032$  vs.  $0.035$ ; Model 2:  $R^2 = 0.117$  vs.  $0.112$ ; Model 3:  $R^2 = 0.167$  vs.  $0.133$ ;  
22 Model 4:  $R^2 = 0.247$  vs.  $0.228$ ; and Model 5:  $R^2 = 0.270$  vs.  $0.240$ , respectively). Regardless of  
23 adjustment factors, memory change, tension, shortness of breath, and indicators of  
24 musculoskeletal symptoms are related to higher PHQ-9 scores (Models 1–3). Further details of  
25 the LASSO analysis are included in the supplementary materials (**eTables 3–7**). Tension,  
26 memory change, and back pain consistently remain in the models after adjustment. When  
27 medical conditions, symptoms, and allergies are taken into account, indicators of obesity (body  
28 mass index, waist circumference) and lack of physical fitness are the most significant predictors  
29 of PHQ-9 score. When physical performance is also factored into the adjustment, laboratory  
30 values are only weakly associated with PHQ-9 scores.  
31  
32  
33  
34  
35  
36  
37  
38  
39  
40  
41  
42  
43  
44  
45  
46

47 **eFigure 1** presents the distribution of PHQ-9 according to other health conditions. The  
48 inter-relationships are clear across this spectrum of measures, emphasizing the importance of  
49 understanding all 3 dimensions when designing interventions.  
50  
51  
52  
53  
54  
55  
56  
57  
58  
59  
60

## DISCUSSION

Our study reinforces previous observations regarding the relationship between PHQ-9 and measures of chronic disease, psychological distress, and poor physical performance. While these findings are not surprising, they highlight how PHQ-9 is an entree into a variety of individual- and population-level concerns that demand more attention. Contextual awareness is critically important when the PHQ-9 is used in clinical practice<sup>13</sup> as recommended by the U.S. Preventive Services Task Force<sup>14</sup> for screening within a health system or for public health assessment.

This analysis cannot answer questions of cause and effect since it is cross-sectional. The PHQ-9 and detailed serial measures of biological, clinical, behavioral, and social function will be assessed in the ongoing BHS longitudinal study; the bi-directional relationship between the PHQ-9 and these multiple measures will be particularly interesting, as few studies have collected this amount of detail in a diverse population. This measurement depth of demographic, clinical, biological, and behavioral issues offers an opportunity to better understand how different aspects of distress track similarly or differently over time.

An important aspect of our examination is how the binary division of PHQ-9 into labels of depression or “not depression” leaves significant content unattended. While the division of PHQ-9 scores at 10 provides good discrimination with regard to a clinical diagnosis of Major Depressive Disorder,<sup>3,6,7</sup> the gradient between a score of 0 and 10 contains relevant information about distress levels. Such a finding is not novel,<sup>15</sup> but a reminder that singular focus on a binary classification tends to obscure important information. For example, demographic data demonstrate how females and younger participants had higher PHQ-9 scores, yet whether this

1  
2  
3 finding represents a different approach to revealing concerns or more significant distress is  
4  
5 unclear.

6  
7  
8 The higher scores associated with elevated heart rates, body mass index, and abdominal  
9  
10 girth were expected and consistent with previous literature. In general, PHQ-9 scores aligned  
11  
12 with musculoskeletal or central and peripheral nervous system disorders,<sup>16,17</sup> but less with  
13  
14 cardiovascular disease, cancer, and other more organ-focused conditions. The previously widely-  
15  
16 reported association with obesity and diabetes was confirmed in our study.<sup>18-21</sup> We found low  
17  
18 PHQ-9 scores in a small, but noticeable proportion of the population with a previous diagnosis of  
19  
20 depression, which could represent diagnostic errors, inaccurate reporting of medical history, or  
21  
22 recovery from a previous episode of depression.  
23  
24

25  
26 The profound relationship between PHQ-9 score and a host of common symptoms<sup>22-26</sup> is  
27  
28 also expected, but the continuous nature of the relationship with PHQ-9 score and the depth of  
29  
30 the relationships raise many issues that need further exploration. Significant predictors of PHQ-9  
31  
32 scores include a wide range of concerns encompassing neurological disease, musculoskeletal  
33  
34 disease,<sup>27,28</sup> and psychological distress. A particularly notable finding is the progressive and  
35  
36 highly significant relationship between reported memory loss and PHQ-9 score. Among people  
37  
38 with PHQ-9 scores of 0, only 1.9% reported memory change, while among those with PHQ-9  
39  
40 scores >15, memory change was reported in 34%.  
41  
42  
43

44  
45 Finally, participants with higher PHQ-9 scores had impaired physical functioning, as  
46  
47 indicated by a host of measurements, including daily steps, 6-minute walk distance, ability to  
48  
49 balance on one leg, or propensity to exert a strong grip. Multiple previous studies have shown  
50  
51 that depression and physical functioning are inter-related<sup>29-34</sup> and that interventions to increase  
52  
53 physical activity can improve depression status.<sup>35,36</sup> Nevertheless, the overall picture of this study  
54  
55  
56  
57  
58  
59  
60

1  
2  
3 highlights the need for multimodal intervention to enable people with social disadvantages and  
4  
5 physical comorbidities to improve physical function.  
6  
7  
8  
9

## 10 **Limitations**

11  
12 This study has some limitations. First, the cross-sectional nature of the study limits our ability to  
13  
14 assess the time course of these findings; however, follow-up is currently accruing. The time  
15  
16 course of chronic disease and symptom progression in relation to the PHQ-9 will be of interest.  
17  
18 Second, people with significant depression are probably less likely to volunteer, thereby limiting  
19  
20 the breadth of depression observed in this study; BHS participants are volunteers from selected  
21  
22 sites who express willingness to share data. Finally, the population is generally representative of  
23  
24 adult age, sex, race, and ethnicity, but it is not a fully representative sample of the population; the  
25  
26 differences between those who volunteer for digital technology studies and the general  
27  
28 population are well-known.<sup>37</sup> We also lack detailed information on depression treatment, which  
29  
30 is a potentially modifying factor.  
31  
32  
33  
34  
35  
36  
37

## 38 **Conclusions**

39  
40 PHQ-9 scores are related to multiple demographic, vital sign, and clinical measures that indicate  
41  
42 poor physical status. BHS data provide a comprehensive picture of numerous interactive factors  
43  
44 influencing PHQ-9 scores, thereby demonstrating how focusing on one chief complaint in hopes  
45  
46 of improving depression status is likely futile, given that many common symptoms and physical  
47  
48 limitations are profoundly integrated with depression status. The close association with  
49  
50 symptoms often considered somatic raises a practical issue for clinical practice, and this is  
51  
52 evident across the entire spectrum of PHQ-9 scores. When a high PHQ-9 score or other indicator  
53  
54  
55  
56  
57  
58  
59  
60



1  
2  
3 of depression brings someone to the attention of a clinician, contextual awareness is critically  
4  
5 important to provide an effective clinical intervention. When someone has significant  
6  
7 neurological or musculoskeletal symptoms, assessment for depression should be a routine  
8  
9 consideration. The complex associations across biological, clinical, behavioral, and social factors  
10  
11 stress the need for holistic evaluation of depression for individuals, as well as patient  
12  
13  
14  
15 populations.  
16  
17  
18  
19  
20  
21  
22  
23  
24  
25  
26  
27  
28  
29  
30  
31  
32  
33  
34  
35  
36  
37  
38  
39  
40  
41  
42  
43  
44  
45  
46  
47  
48  
49  
50  
51  
52  
53  
54  
55  
56  
57  
58  
59  
60

## ACKNOWLEDGMENTS

### Baseline Health Study Team

**American Society of Clinical Oncology, Alexandria, VA, USA:** Richard L. Schilsky. **Duke University, School of Medicine, Durham, NC, USA:** Jennifer Allen, MaryAnn Anderson, Kevin Anstrom, Lucus Araujo, Kristine Arges, Kaveh Ardalán, Bridget Baldwin, Suresh Balu, Mustafa R. Bashir, Manju Bhapkar, Robert Bigelow, Tanya Black, Rosalia Blanco, Gerald Bloomfield, Durga Borkar, Leah Bouk, Ebony Boulware, Nikki Brugnoli, Erin Campbell, Paul Campbell, Larry Carin, Tammy Jo Cassella, Tina Cates, Ranee Chatterjee Montgomery, Victoria Christian, John Choong, Michael Cohen-Wolkowicz, Elizabeth Cook, Scott Cousins, Ashley Crawford, Nisha Datta, Melissa Daubert, James Davis, Jillian Dirkes, Isabelle Doan, Marie Dockery, P. Murali Doraiswamy, Pamela S. Douglas, Shelly Duckworth, Ashley Dunham, Gary Dunn, Ryan Ebersohl, Julie Eckstrand, Vivienne Fang, April Flora, Emily Ford, Lucia Foster, Elizabeth Fraulo, John French, Geoffrey S. Ginsburg, Cindy Green, Latoya Greene, Jeffrey Guptill, Donna Hamel, Jennifer Hamill, Chris Harrington, Rob Harrison, Lauren Hedges, Brooke Heidenfelder, Adrian F. Hernandez, Cindy Heydary, Tim Hicks, Lina Hight, Deborah Hopkins, Erich S. Huang, Grace Huh, Jillian Hurst, Kelly Inman, Gemini Janas, Glenn Jaffee, Janace Johnson, Tiffanie Keaton, Michel Khouri, Daniel King, Jennifer Korzekwinski, Lynne H. Koweek, Anthony Kuo, Lydia Kwee, Dawn Landis, Rachele Lipsky, Desiree Lopez, Carolyn Lowry, Kelly Marcom, Keith Marsolo, Paige McAdams, Shannon McCall, , Robert McGarrah, John McGugan, Dani Mee, Sabrena Mervin-Blake, Prithu Mettu, Mathias Meyer, Justin Meyers, Calire N. Miller, Rebecca Moen, Lawrence H. Muhlbaier, Michael Murphy, Ben Neely, L. Kristin Newby, Jayne Nicoldson, Hoang Nguyen, Maggie Nguyen, Lori O'Brien, Sumru Onal, Jeremy O'Quinn, David Page, Neha J. Pagidipati, Kishan Parikh, Sarah R. Palmer, Bray

1  
2  
3 Patrick-Lake, Brenda Pattison, Michael Pencina, Eric D. Peterson, Jon Piccini, Terry Poole, Tom  
4  
5 Povsic, Alicia Provencher, Dawn Rabineau, Annette Rich, Susan Rimmer, Fides Schwartz,  
6  
7 Angela Serafin, Nishant Shah, Svati Shah, Kelly Shields, Steven Shipes, Peter Shrader, Jon  
8  
9 Stiber, Lynn Sutton, Geeta Swamy, Betsy Thomas, Sandra Torres, Debara Tucci, Anthony  
10  
11 Twisdale, Brooke Walker, Susan A. Whitney, Robin Williamson, Lauren Wilverding, Charlene  
12  
13 A. Wong, Lisa Wruck. **Ellen Young Gemini Group, USA: Jane Perlmutter. Health**  
14  
15 **Collaboratory and Cancer 101, New York, NY, USA: Sarah Krug. Rare Dots, Inc., USA: S.**  
16  
17 Whitney Bowman-Zatzkin. **Society of Participatory Medicine, USA: Sarah Krug. Stanford**  
18  
19 **University, School of Medicine, Stanford, CA, USA: Themistocles Assimes, Vikram Bajaj,**  
20  
21 Maxwell Cheong, Millie Das, Manisha Desai, Alice C. Fan, Dominik Fleischmann, Sanjiv S.  
22  
23 Gambhir, Garry Gold, Francois Haddad, David Hong, Curtis Langlotz, Yaping J. Liao, Rong Lu,  
24  
25 Kenneth W. Mahaffey, David Maron, Rebecca McCue, Rajan Munshi, Fatima Rodriguez,  
26  
27 Sumana Shashidhar, George Sledge, Susie Spielman, Ryan Spitler, Sue Swope, Donna Williams.  
28  
29 **University of Florida, College of Medicine, Gainesville, FL, USA: Carl J Pepine. University**  
30  
31 **of Missouri, Children's Mercy Hospital, Kansas City, MO, USA: John D Lantos. University**  
32  
33 **of Texas, Dell Medical School, Austin, TX, USA: Michael Pignone. University of**  
34  
35 **Washington, Department of Biostatistics, Seattle, WA, USA: Patrick Heagerty. Vanderbilt**  
36  
37 **University, School of Medicine, Nashville, TN, USA: Laura Beskow, Gordon Bernard. Verily**  
38  
39 **Inc., South San Francisco, CA, USA: Kelley Abad, Giulia Angi, Robert M. Califf, Lawrence**  
40  
41 Deang, Joy Huynh, Manway Liu, Cherry Mao, Michael Magdaleno, William J. Marks, Jr.,  
42  
43 Jessica Mega, David Miller, Nicole Ong, Darshita Patel, Vanessa Ridaura, Scarlet Shore, Sarah  
44  
45 Short, Michelle Tran, Veronica Vu, Celeste Wong. **Harvard University, School of Medicine,**  
46  
47 **Boston, MA, USA: Robert C. Green. Google Inc., Mountain View, CA, USA: John**  
48  
49  
50  
51  
52  
53  
54  
55  
56  
57  
58  
59  
60

1  
2  
3 Hernandez. **California Health and Longevity Institute, Westlake Village, CA, USA:** Jolene  
4  
5 Bengé, Gislia Negrete, Gelsey Sierra, Terry Schaack  
6  
7  
8  
9

### 10 **Sources of funding**

11  
12 The Baseline Health Study and this analysis were funded by Verily Life Sciences, San Francisco,  
13  
14 CA. There is no associated award/grand number.  
15  
16  
17  
18

### 19 **Conflict of interest disclosures**

20  
21 **Califf:** Employee of Verily Life Sciences and Google Health; Board member for Cytokinetics,  
22  
23 United Medicines, and Clinetic.  
24  
25

26 **Wong:** Employee of Verily Life Sciences.  
27

28 **Doraiswamy:** Consulting fees from Verily Life Sciences, Neuronix, Apollo Health, VitaKey,  
29  
30 Neuroglee, Transposon, Otsuka; Research grants from Avanir, Lilly, Avid, Salix; Holds stock in  
31  
32 Evidation Health, Advera Health Analytics, Transposon Therapeutics, Marvel Biome; Board  
33  
34 membership in Apollo; Coinventor on patents for diagnosis or treatment of neuropsychiatric  
35  
36 disorders.  
37  
38

39  
40 **Hong:** Research funding from NIMH; Consulting for Little Otter.  
41

42 **Miller:** Employee of and holds stock in Verily Life Sciences.  
43

44  
45 **Mega:** Employee of Verily Life Sciences.  
46  
47  
48

### 49 **Author contributions**

50  
51 **Califf:** Dr. Califf had full access to all of the data in the study and takes responsibility for the  
52  
53 integrity of the data and the accuracy of the data analysis. Dr. Califf contributed to the  
54  
55  
56  
57  
58  
59

1  
2  
3 conception and design of the study, the data analysis, the data interpretation, the manuscript  
4 drafting, and the critical revision of the manuscript.  
5

6  
7 **Wong:** Dr. Wong contributed to the conception and design of the study, data interpretation, the  
8 manuscript drafting, and the critical revision of the manuscript.  
9

10  
11 **Doraiswamy:** Dr. Doraiswamy contributed to the data interpretation, the manuscript drafting,  
12 and the critical revision of the manuscript.  
13

14  
15 **Hong:** Dr. Hong contributed to the data interpretation, the manuscript drafting, and the critical  
16 revision of the manuscript.  
17

18  
19 **Miller:** Dr. Miller contributed to the conception and design of the study, data interpretation, the  
20 manuscript drafting, and the critical revision of the manuscript.  
21

22  
23 **Mega:** Dr. Mega contributed to the conception and design of the study, the supervision, data  
24 acquisition, data interpretation, the manuscript drafting, and the critical revision of the  
25 manuscript.  
26

### 27 28 29 30 31 32 33 34 35 **Data sharing statement**

36  
37 The study is committed to access to the study data for qualified investigators from the global  
38 community after testing the process within the diverse investigator communities of the  
39 participating institutions. Please see the following article for more information: Arges K,  
40 Assimes T, Bajaj V, et al. The Project Baseline Health Study: a step towards a broader mission to  
41 map human health. npj Digit Med. 3, 84 (2020). <https://doi.org/10.1038/s41746-020-0290-y>.  
42  
43  
44  
45  
46  
47  
48  
49  
50  
51  
52  
53  
54  
55  
56  
57  
58  
59  
60

**REFERENCES**

1. GBD 2017 Disease and Injury Incidence and Prevalence Collaborators. Global, regional, and national incidence, prevalence, and years lived with disability for 354 diseases and injuries for 195 countries and territories, 1990–2017: a systematic analysis for the Global Burden of Disease Study 2017. *Lancet*. 2018;392(10159):1789–1858.
2. Perry PJ. *The Interaction of Major Depression and Medical Illness*. Medscape; 2005. Available at: <https://www.medscape.org/viewarticle/517033>.
3. Kroenke K, Spitzer RL, Williams JB. The PHQ-9: validity of a brief depression severity measure. *J Gen Intern Med*. 2001;16(9):606–613.
4. Huang FY, Chung H, Kroenke K, Delucchi KL, Spitzer RL. Using the Patient Health Questionnaire-9 to measure depression among racially and ethnically diverse primary care patients. *J Gen Intern Med*. 2006;21(6):547–552.
5. Patel JS, Oh Y, Rand KL, et al. Measurement invariance of the patient health questionnaire-9 (PHQ-9) depression screener in U.S. adults across sex, race/ethnicity, and education level: NHANES 2005–2016. *Depress Anxiety*. 2019;36(9):813–823.
6. Levis B, Benedetti A, Thombs BD for the DEPRESSion Screening Data (DEPRESSD) Collaboration. Accuracy of Patient Health Questionnaire-9 (PHQ-9) for screening to detect major depression: individual participant data meta-analysis. *BMJ*. 2019;365:1476.
7. Levis B, Sun Y, He C, et al. Accuracy of the PHQ-2 alone and in combination with the PHQ-9 for screening to detect major depression: systematic review and meta-analysis. *JAMA*. 2020;323(22):2290–2300.
8. Arges K, Assimes T, Bajaj V, et al. The Project Baseline Health Study: a step towards a broader mission to map human health. *NPJ Digit Med*. 2020;3:84.

- 1  
2  
3 9. Califf RM, Wong C, Doraiswamy PM, Hong DS, Miller DP, Mega JL. Importance of  
4 social determinants in screening for depression. *J Gen Intern Med*. [In press].  
5  
6
- 7  
8 10. Armitage P. Tests for linear trends in proportions and frequencies. *Biometrics*.  
9  
10 1955;11(3):375–386.  
11
- 12 11. Liu L, Berger VW, Hershberger SL. Trend tests for counts and proportions. Wiley  
13  
14 *StatsRef: Statistics Reference Online*. 2014.  
15  
16 <https://doi.org/10.1002/9781118445112.stat06163>.  
17  
18
- 19 12. Mukaka MM. A guide to appropriate use of Correlation coefficient in medical research.  
20  
21 *Malawi Med J*. 2012;24(3):69–71.  
22
- 23 13. Spitzer RL, Kroenke K, Williams JB. Validation and utility of a self-report version of  
24  
25 PRIME-MD: the PHQ primary care study. *Primary Care Evaluation of Mental Disorders*.  
26  
27 *Patient Health Questionnaire*. *JAMA*. 1999;282(18):1737–1744.  
28  
29
- 30 14. Siu AL, US Preventive Services Task Force (USPSTF), Bibbins-Domingo K, et al.  
31  
32 *Screening for depression in adults: US Preventive Services Task Force Recommendation*  
33  
34 *Statement*. *JAMA*. 2016;315(4):380–387.  
35  
36
- 37 15. Thombs BD, Benedetti A, Kloda LA, et al. The diagnostic accuracy of the Patient Health  
38  
39 *Questionnaire-2 (PHQ-2), Patient Health Questionnaire-8 (PHQ-8), and Patient Health*  
40  
41 *Questionnaire-9 (PHQ-9) for detecting major depression: protocol for a systematic*  
42  
43 *review and individual patient data meta-analyses*. *Syst Rev*. 2014;3:124.  
44  
45
- 46 16. Hoshino E, Ohde S, Rahman M, Takahashi O, Fukui T, Deshpande GA. Variation in  
47  
48 *somatic symptoms by patient health questionnaire-9 depression scores in a representative*  
49  
50 *Japanese sample*. *BMC Public Health*. 2018;18(1):1406.  
51  
52  
53  
54  
55  
56  
57  
58  
59  
60

17. Leavens A, Patten SB, Hudson M, Baron M, Thombs BD; Canadian Scleroderma Research Group. Influence of somatic symptoms on Patient Health Questionnaire-9 depression scores among patients with systemic sclerosis compared to a healthy general population sample. *Arthritis Care Res (Hoboken)*. 2012;64(8):1195–1201.
18. Snoek FJ, Bremmer MA, Hermanns N. Constructs of depression and distress in diabetes: time for an appraisal. *Lancet Diabetes Endocrinol*. 2015;3(6):450–460.
19. Nouwen A, Winkley K, Twisk J, et al. Type 2 diabetes mellitus as a risk factor for the onset of depression: a systematic review and meta-analysis. *Diabetologia*. 2010;53(12):2480–2486.
20. Ciechanowski PS, Katon WJ, Russo JE. Depression and diabetes: impact of depressive symptoms on adherence, function, and costs. *Arch Intern Med*. 2000;160(21):3278–3285.
21. Lustman PJ, Anderson RJ, Freedland KE, de Groot M, Carney RM, Clouse RE. Depression and poor glycemic control: a meta-analytic review of the literature. *Diabetes Care*. 2000;23(7):934–942.
22. Kroenke K, Spitzer RL, Williams JB. The PHQ-15: validity of a new measure for evaluating the severity of somatic symptoms. *Psychosom Med*. 2002;64(2):258–266.
23. Kocalevent RD, Hinz A, Brähler E. Standardization of a screening instrument (PHQ-15) for somatization syndromes in the general population. *BMC Psychiatry*. 2013;13:91.
24. Löwe B, Spitzer RL, Williams JB, Mussell M, Schellberg D, Kroenke K. Depression, anxiety and somatization in primary care: syndrome overlap and functional impairment. *Gen Hosp Psychiatry*. 2008;30(3):191–199.



- 1  
2  
3 25. Ziebold C, Goldberg DP, Reed GM, et al. Dimensional analysis of depressive, anxious  
4 and somatic symptoms presented by primary care patients and their relationship with  
5 ICD-11 PHC proposed diagnoses. *Psychol Med*. 2019;49(5):764–771.  
6  
7  
8  
9  
10 26. Kroenke K, Spitzer RL, Williams JB, Löwe B. The Patient Health Questionnaire  
11 Somatic, Anxiety, and Depressive Symptom Scales: a systematic review. *Gen Hosp*  
12 *Psychiatry*. 2010;32(4):345–359.  
13  
14  
15  
16  
17 27. Hartvigsen J, Christensen K. Pain in the back and neck are with us until the end: a  
18 nationwide interview-based survey of Danish 100-year-olds. *Spine (Phila Pa 1976)*.  
19 2008;33(8):909–913.  
20  
21  
22  
23  
24 28. Reichborn-Kjennerud T, Stoltenberg C, Tambs K, et al. Back-neck pain and symptoms of  
25 anxiety and depression: a population-based twin study. *Psychol Med*. 2002;32(6):1009–  
26 1020.  
27  
28  
29  
30  
31 29. Zhang J, Yen ST. Physical activity, gender difference, and depressive symptoms. *Health*  
32 *Serv Res*. 2015 Oct;50(5):1550–173.  
33  
34  
35  
36 30. Farmer ME, Locke BZ, Mościcki EK, Dannenberg AL, Larson DB, Radloff LS. Physical  
37 activity and depressive symptoms: the NHANES I Epidemiologic Follow-up Study. *Am J*  
38 *Epidemiol*. 1988;128(6):1340–1351.  
39  
40  
41  
42 31. Helgadóttir B, Forsell Y, Ekblom Ö. Physical activity patterns of people affected by  
43 depressive and anxiety disorders as measured by accelerometers: a cross-sectional study.  
44 *PLoS One*. 2015;10(1):e0115894.  
45  
46  
47  
48  
49 32. Sieverdes JC, Ray BM, Sui X, et al. Association between leisure time physical activity  
50 and depressive symptoms in men. *Med Sci Sports Exerc*. 2012;44(2):260–265.  
51  
52  
53  
54  
55  
56  
57  
58  
59  
60

- 1  
2  
3 33. Sun GZ, Ye N, Wu SJ, Zhou Y, Sun YX. 10-year ASCVD risk is positively correlated  
4 with depressive symptoms in a large general population. *BMC Psychiatry*.  
5  
6 2019;19(1):125.  
7  
8  
9  
10 34. Jha MK, Qamar A, Vaduganathan M, Charney DS, Murrrough JW. Screening and  
11 management of depression in patients with cardiovascular disease: JACC State-of-the-Art  
12 Review. *J Am Coll Cardiol*. 2019;73(14):1827–1845.  
13  
14  
15  
16 35. Wegner M, Helmich I, Machado S, Nardi AE, Arias-Carrion O, Budde H. Effects of  
17 exercise on anxiety and depression disorders: review of meta- analyses and  
18 neurobiological mechanisms. *CNS Neurol Disord Drug Targets*. 2014;13(6):1002–1014.  
19  
20  
21  
22 36. Blumenthal JA, Babyak MA, Doraiswamy PM, et al. Exercise and pharmacotherapy in  
23 the treatment of major depressive disorder. *Psychosomatic Med*. 2007;69(7):587–596.  
24  
25  
26  
27 37. Fareed N, Swoboda CM, Jonnalagadda P, Huerta TR. Persistent digital divide in health-  
28 related internet use among cancer survivors: findings from the Health Information  
29 National Trends Survey, 2003–2018. *J Cancer Surviv*. 2021;15(1):87–98.  
30  
31  
32  
33  
34  
35  
36  
37  
38  
39  
40  
41  
42  
43  
44  
45  
46  
47  
48  
49  
50  
51  
52  
53  
54  
55  
56  
57  
58  
59  
60

**Table 1. Demographics: PHQ-9 score**

|                                  | <b>PHQ-9 0<br/>(N=484)</b> | <b>PHQ-9 1-4<br/>(N=1086)</b> | <b>PHQ-9 5-9<br/>(N=518)</b> | <b>PHQ-9 10-14<br/>(N=184)</b> | <b>PHQ-9 15+<br/>(N=93)</b> |
|----------------------------------|----------------------------|-------------------------------|------------------------------|--------------------------------|-----------------------------|
| Age, median (25th, 75th)*        | 53.6 (36.7, 66.1)          | 51.7 (37.0, 66.5)             | 47.6 (32.7, 60.7)            | 42.8 (31.2, 55.1)              | 42.4 (32.1, 54.2)           |
| Female sex*                      | 227 (46.9)                 | 622 (57.3)                    | 299 (57.7)                   | 108 (58.7)                     | 62 (66.7)                   |
| Race                             |                            |                               |                              |                                |                             |
| Black                            | 80 (16.5)                  | 153 (14.1)                    | 82 (15.8)                    | 31 (16.8)                      | 19 (20.4)                   |
| White                            | 294 (60.7)                 | 731 (67.3)                    | 323 (62.4)                   | 110 (59.8)                     | 57 (61.3)                   |
| Asian†                           | 64 (13.2)                  | 113 (10.4)                    | 47 (9.1)                     | 15 (8.2)                       | 5 (5.4)                     |
| NHOPI                            | 7 (1.4)                    | 11 (1)                        | 7 (1.4)                      | 2 (1.1)                        | 0 (0.0)                     |
| American Indian or Alaska Native | 4 (0.8)                    | 8 (0.7)                       | 11 (2.1)                     | 3 (1.6)                        | 1 (1.1)                     |
| Other†                           | 35 (7.2)                   | 70 (6.4)                      | 48 (9.3)                     | 23 (12.5)                      | 11 (11.8)                   |
| Ethnicity                        |                            |                               |                              |                                |                             |
| Hispanic                         | 54 (11.2)                  | 108 (9.9)                     | 69 (13.3)                    | 26 (14.1)                      | 13 (14.0)                   |
| Site                             |                            |                               |                              |                                |                             |
| Los Angeles                      | 94 (19.4)                  | 194 (17.9)                    | 111 (21.4)                   | 35 (19)                        | 21 (22.6)                   |
| Durham                           | 99 (20.5)                  | 196 (18.0)                    | 102 (19.7)                   | 40 (21.7)                      | 25 (26.9)                   |
| Kannapolis                       | 100 (20.7)                 | 226 (20.8)                    | 105 (20.3)                   | 41 (22.3)                      | 28 (30.1)                   |
| Palo Alto †                      | 191 (39.5)                 | 470 (43.3)                    | 200 (38.6)                   | 68 (37.0)                      | 19 (20.4)                   |

|                                                                                                                                                                                                                                                                                                                                                                                                                         |                      |                      |                      |                      |                      |
|-------------------------------------------------------------------------------------------------------------------------------------------------------------------------------------------------------------------------------------------------------------------------------------------------------------------------------------------------------------------------------------------------------------------------|----------------------|----------------------|----------------------|----------------------|----------------------|
| Systolic BP, median (25th, 75th), mm Hg                                                                                                                                                                                                                                                                                                                                                                                 | 123.0 (112.5, 133.1) | 122.0 (112.0, 132.5) | 123.0 (112.5, 133.5) | 119.5 (109.9, 132.0) | 122.5 (115.5, 130.5) |
| Diastolic BP, median (25th, 75th), mm Hg                                                                                                                                                                                                                                                                                                                                                                                | 75.5 (69.0, 82.0)    | 75.0 (68.0, 82.0)    | 76.0 (70.0, 83.5)    | 74.0 (68.9, 81.1)    | 77.5 (71.5, 84.0)    |
| Body mass index, median (25th, 75th), kg/m <sup>2</sup> *                                                                                                                                                                                                                                                                                                                                                               | 26.5 (23.7, 29.9)    | 26.1 (22.9, 31.0)    | 28.0 (24.5, 33.2)    | 29.1 (25.1, 34.7)    | 30.0 (25.4, 38.8)    |
| Waist circumference, median (25th, 75th), cm*                                                                                                                                                                                                                                                                                                                                                                           | 91.0 (81.0, 100.1)   | 88.9 (78.7, 101.6)   | 93.0 (81.3, 105.4)   | 96.5 (82.0, 111.8)   | 96.5 (81.6, 112.5)   |
| Heart rate, median (25th, 75th), beats/min*                                                                                                                                                                                                                                                                                                                                                                             | 65.0 (58.0, 72.0)    | 66.0 (59.0, 73.0)    | 67.0 (60.0, 77.0)    | 70.0 (61.8, 80.0)    | 75.0 (65.0, 82.0)    |
| Respiratory rate, median (25th, 75th), breaths/min*                                                                                                                                                                                                                                                                                                                                                                     | 16.0 (14.0, 16.0)    | 16.0 (14.0, 16.0)    | 16.0 (14.0, 17.0)    | 16.0 (14.0, 18.0)    | 16.0 (16.0, 18.0)    |
| Oxygen saturation, median (25th, 75th), %†                                                                                                                                                                                                                                                                                                                                                                              | 99.0 (98.0, 100.0)   | 99.0 (98.0, 100.0)   | 99.0 (98.0, 100.0)   | 99.0 (97.0, 100.0)   | 98.0 (97.0, 100.0)   |
| <p>Data shown are no. (%), unless otherwise indicated.<br/>           BP, blood pressure; NHOPI, Native Hawaiians and other Pacific Islanders; PHQ-9, Patient Health Questionnaire-9.<br/>           P-values for trend were calculated with the use of Spearman Correlation or Cochran-Armitage tests, where appropriate.<br/>           *P-value for trend &lt;0.0001.<br/>           †P-value for trend &lt;0.01</p> |                      |                      |                      |                      |                      |

**Table 2. Medical history: PHQ-9 score**

|                                          | <b>PHQ-9 0<br/>(N=484)</b> | <b>PHQ-9 1-4<br/>(N=1086)</b> | <b>PHQ-9 5-9<br/>(N=518)</b> | <b>PHQ-9 10-14<br/>(N=184)</b> | <b>PHQ-9<br/>15+<br/>(N=93)</b> |
|------------------------------------------|----------------------------|-------------------------------|------------------------------|--------------------------------|---------------------------------|
| Alcohol use disorder*                    | 1 (0.2)                    | 20 (1.8)                      | 12 (2.3)                     | 7 (3.8)                        | 6 (6.5)                         |
| Fibromyalgia*                            | 2 (0.4)                    | 10 (0.9)                      | 11 (2.1)                     | 7 (3.8)                        | 6 (6.5)                         |
| Gallbladder disorder†                    | 18 (3.7)                   | 57 (5.2)                      | 32 (6.2)                     | 14 (7.6)                       | 8 (8.6)                         |
| Bipolar disorder*                        | 3 (0.6)                    | 9 (0.8)                       | 12 (2.3)                     | 9 (4.9)                        | 8 (8.6)                         |
| PTSD*                                    | 8 (1.7)                    | 14 (1.3)                      | 15 (2.9)                     | 21 (11.4)                      | 9 (9.7)                         |
| Hypercholesterolemia                     | 68 (14.0)                  | 127 (11.7)                    | 70 (13.5)                    | 19 (10.3)                      | 9 (9.7)                         |
| Irritable bowel disorder†                | 9 (1.9)                    | 60 (5.5)                      | 34 (6.6)                     | 7 (3.8)                        | 10 (10.8)                       |
| COPD with emphysema*                     | 5 (1.0)                    | 19 (1.7)                      | 22 (4.2)                     | 12 (6.5)                       | 10 (10.8)                       |
| Sleep apnea                              | 38 (7.9)                   | 101 (9.3)                     | 63 (12.2)                    | 19 (10.3)                      | 11 (11.8)                       |
| ADHD*                                    | 15 (3.1)                   | 50 (4.6)                      | 33 (6.4)                     | 25 (13.6)                      | 11 (11.8)                       |
| Diabetes type 2†                         | 45 (9.3)                   | 109 (10.0)                    | 62 (12.0)                    | 32 (17.4)                      | 14 (15.1)                       |
| Pneumonia                                | 30 (6.2)                   | 85 (7.8)                      | 40 (7.7)                     | 12 (6.5)                       | 15 (16.1)                       |
| Osteoarthritis                           | 76 (15.7)                  | 216 (19.9)                    | 118 (22.8)                   | 33 (17.9)                      | 17 (18.3)                       |
| Asthma*                                  | 46 (9.5)                   | 157 (14.5)                    | 79 (15.3)                    | 39 (21.2)                      | 19 (20.4)                       |
| Migraine*                                | 29 (6.0)                   | 134 (12.3)                    | 77 (14.9)                    | 31 (16.8)                      | 19 (20.4)                       |
| GERD*                                    | 64 (13.2)                  | 176 (16.2)                    | 106 (20.5)                   | 40 (21.7)                      | 23 (24.7)                       |
| Hypertension                             | 122 (25.2)                 | 297 (27.3)                    | 144 (27.8)                   | 51 (27.7)                      | 26 (28.0)                       |
| Anxiety*                                 | 13 (2.7)                   | 98 (9.0)                      | 109 (21.0)                   | 55 (29.9)                      | 34 (36.6)                       |
| Depression*                              | 16 (3.3)                   | 93 (8.6)                      | 110 (21.2)                   | 63 (34.2)                      | 55 (59.1)                       |
| Hay fever                                | 26 (5.4)                   | 78 (7.2)                      | 36 (6.9)                     | 19 (10.3)                      | 3 (3.2)                         |
| Discharge†                               | 19 (3.9)                   | 64 (5.9)                      | 44 (8.5)                     | 18 (9.8)                       | 8 (8.6)                         |
| Hemorrhoids†                             | 22 (4.5)                   | 69 (6.4)                      | 40 (7.7)                     | 17 (9.2)                       | 9 (9.7)                         |
| Itching skin*                            | 19 (3.9)                   | 81 (7.5)                      | 50 (9.7)                     | 30 (16.3)                      | 10 (10.8)                       |
| Sinus pain*                              | 18 (3.7)                   | 77 (7.1)                      | 58 (11.2)                    | 21 (11.4)                      | 10 (10.8)                       |
| Urgency*                                 | 13 (2.7)                   | 69 (6.4)                      | 46 (8.9)                     | 23 (12.5)                      | 10 (10.8)                       |
| Excessive belching or<br>passing of gas* | 24 (5.0)                   | 84 (7.7)                      | 54 (10.4)                    | 29 (15.8)                      | 13 (14.0)                       |
| Ear ringing†                             | 38 (7.9)                   | 101 (9.3)                     | 59 (11.4)                    | 23 (12.5)                      | 13 (14.0)                       |
| Dryness*                                 | 35 (7.2)                   | 113 (10.4)                    | 68 (13.1)                    | 39 (21.2)                      | 14 (15.1)                       |
| Heartburn*                               | 27 (5.6)                   | 94 (8.7)                      | 70 (13.5)                    | 42 (22.8)                      | 15 (16.1)                       |
| Dry mouth*                               | 27 (5.6)                   | 84 (7.7)                      | 64 (12.4)                    | 28 (15.2)                      | 16 (17.2)                       |

|                                        |           |            |            |           |           |
|----------------------------------------|-----------|------------|------------|-----------|-----------|
| Constipation *                         | 22 (4.5)  | 98 (9.0)   | 64 (12.4)  | 48 (26.1) | 17 (18.3) |
| Numbness or loss of sensation *        | 17 (3.5)  | 54 (5.0)   | 38 (7.3)   | 19 (10.3) | 17 (18.3) |
| Easy bruising or bleeding <sup>†</sup> | 39 (8.1)  | 130 (12.0) | 68 (13.1)  | 22 (12.0) | 18 (19.4) |
| Cramping*                              | 14 (2.9)  | 62 (5.7)   | 45 (8.7)   | 18 (9.8)  | 18 (19.4) |
| Frequency of urination *               | 33 (6.8)  | 90 (8.3)   | 73 (14.1)  | 34 (18.5) | 19 (20.4) |
| Runny nose <sup>†</sup>                | 70 (14.5) | 210 (19.3) | 116 (22.4) | 44 (23.9) | 20 (21.5) |
| Swelling in calves, legs, or feet *    | 15 (3.1)  | 62 (5.7)   | 49 (9.5)   | 31 (16.8) | 20 (21.5) |
| Coughing up sputum *                   | 12 (2.5)  | 62 (5.7)   | 56 (10.8)  | 27 (14.7) | 20 (21.5) |
| Floater <sup>†</sup>                   | 55 (11.4) | 160 (14.7) | 81 (15.6)  | 28 (15.2) | 21 (22.6) |
| Pain or stiffness in neck *            | 32 (6.6)  | 128 (11.8) | 72 (13.9)  | 49 (26.6) | 22 (23.7) |
| Diarrhea *                             | 24 (5.0)  | 99 (9.1)   | 70 (13.5)  | 31 (16.8) | 22 (23.7) |
| Night sweats *                         | 22 (4.5)  | 88 (8.1)   | 65 (12.5)  | 25 (13.6) | 22 (23.7) |
| Lightheadedness *                      | 11 (2.3)  | 62 (5.7)   | 53 (10.2)  | 37 (20.1) | 22 (23.7) |
| Cough *                                | 36 (7.4)  | 98 (9.0)   | 83 (16.0)  | 41 (22.3) | 23 (24.7) |
| Tingling or numbness in extremities *  | 35 (7.2)  | 101 (9.3)  | 74 (14.3)  | 36 (19.6) | 23 (24.7) |
| Leg cramps *                           | 31 (6.4)  | 103 (9.5)  | 55 (10.6)  | 31 (16.8) | 23 (24.7) |
| Shortness of breath with exercise *    | 11 (2.3)  | 59 (5.4)   | 68 (13.1)  | 37 (20.1) | 23 (24.7) |
| Joint pain or swelling*                | 42 (8.7)  | 140 (12.9) | 81 (15.6)  | 45 (24.5) | 25 (26.9) |
| Sleeping pattern changes *             | 21 (4.3)  | 126 (11.6) | 78 (15.1)  | 47 (25.5) | 25 (26.9) |
| Tingling or pins and needles *         | 30 (6.2)  | 91 (8.4)   | 75 (14.5)  | 36 (19.6) | 25 (26.9) |
| Appetite changes *                     | 9 (1.9)   | 36 (3.3)   | 35 (6.8)   | 25 (13.6) | 26 (28.0) |
| Heat or cold intolerance *             | 17 (3.5)  | 85 (7.8)   | 65 (12.5)  | 36 (19.6) | 27 (29.0) |
| Shortness of breath *                  | 8 (1.7)   | 51 (4.7)   | 57 (11.0)  | 34 (18.5) | 27 (29.0) |
| Bloating *                             | 26 (5.4)  | 104 (9.6)  | 61 (11.8)  | 41 (22.3) | 29 (31.2) |
| Body image concerns *                  | 9 (1.9)   | 40 (3.7)   | 46 (8.9)   | 33 (17.9) | 29 (31.2) |
| Nasal stuffiness *                     | 70 (14.5) | 218 (20.1) | 141 (27.2) | 53 (28.8) | 30 (32.3) |
| Urination at night *                   | 69 (14.3) | 172 (15.8) | 105 (20.3) | 43 (23.4) | 30 (32.3) |
| Muscle or joint pain*                  | 71 (14.7) | 225 (20.7) | 142 (27.4) | 61 (33.2) | 31 (33.3) |
| Memory change*                         | 9 (1.9)   | 52 (4.8)   | 55 (10.6)  | 41 (22.3) | 32 (34.4) |
| Headache*                              | 28 (5.8)  | 151 (13.9) | 104 (20.1) | 44 (23.9) | 38 (40.9) |
| Fatigue*                               | 10 (2.1)  | 129 (11.9) | 113 (21.8) | 65 (35.3) | 38 (40.9) |

|                           |           |            |            |           |           |
|---------------------------|-----------|------------|------------|-----------|-----------|
| Stiffness*                | 76 (15.7) | 267 (24.6) | 121 (23.4) | 63 (34.2) | 39 (41.9) |
| Backache*                 | 43 (8.9)  | 183 (16.9) | 148 (28.6) | 63 (34.2) | 39 (41.9) |
| Nervousness*              | 4 (0.8)   | 46 (4.2)   | 51 (9.8)   | 39 (21.2) | 43 (46.2) |
| Mood change*              | 6 (1.2)   | 36 (3.3)   | 60 (11.6)  | 42 (22.8) | 44 (47.3) |
| Difficulty concentrating* | 8 (1.7)   | 58 (5.3)   | 74 (14.3)  | 54 (29.3) | 50 (53.8) |
| Neck or low back pain*    | 73 (15.1) | 264 (24.3) | 185 (35.7) | 73 (39.7) | 51 (54.8) |
| Tension*                  | 10 (2.1)  | 84 (7.7)   | 86 (16.6)  | 44 (23.9) | 51 (54.8) |
| Lack of energy*           | 6 (1.2)   | 92 (8.5)   | 115 (22.2) | 74 (40.2) | 53 (57.0) |

Data presented as no. (%).

ADHD, attention deficit hyperactivity disorder; COPD, chronic obstructive pulmonary disease; GERD, gastroesophageal reflux disease; PHQ-9, Patient Health Questionnaire-9; PTSD, post-traumatic stress disorder.

P-values for trend were calculated with the use of Spearman Correlation or Cochran-Armitage tests, where appropriate.

\*P-value for trend <0.0001.

†P-value for trend <0.01.

**Table 3. Physical Functioning: PHQ-9 Score**

|                                                                                                                                                                                                                                                                                                                                                                                                                             | <b>PHQ-9 0<br/>(N=484)</b> | <b>PHQ-9 1-4<br/>(N=1086)</b> | <b>PHQ-9 5-9<br/>(N=518)</b> | <b>PHQ-9 10-14<br/>(N=184)</b> | <b>PHQ-9 15+<br/>(N=93)</b> |
|-----------------------------------------------------------------------------------------------------------------------------------------------------------------------------------------------------------------------------------------------------------------------------------------------------------------------------------------------------------------------------------------------------------------------------|----------------------------|-------------------------------|------------------------------|--------------------------------|-----------------------------|
| 6-minute walk*                                                                                                                                                                                                                                                                                                                                                                                                              | 485.5 (444.0, 543.2)       | 480.0 (431.7, 530.3)          | 465.0 (422.0, 517.6)         | 460.1 (403.8, 511.9)           | 443.0 (391.2, 492.4)        |
| 30-second chair stand*                                                                                                                                                                                                                                                                                                                                                                                                      | 15.0 (12.0, 18.0)          | 14.0 (12.0, 17.0)             | 13.0 (11.0, 16.0)            | 13.0 (10.0, 16.0)              | 12.0 (10.0, 15.0)           |
| Mean leg balance time†                                                                                                                                                                                                                                                                                                                                                                                                      | 60.0 (23.5, 60.0)          | 55.0 (21.4, 60.0)             | 50.5 (14.0, 60.0)            | 49.5 (11.0, 60.0)              | 44.0 (12.5, 60.0)           |
| 10-meter walk speed*                                                                                                                                                                                                                                                                                                                                                                                                        | 2.0 (1.8, 2.2)             | 2.0 (1.8, 2.2)                | 2.0 (1.6, 2.1)               | 1.8 (1.5, 2.0)                 | 1.8 (1.5, 2.0)              |
| Handgrip†                                                                                                                                                                                                                                                                                                                                                                                                                   | 35.8 (27.8, 44.4)          | 32.5 (26.3, 42.5)             | 32.3 (26.4, 42.8)            | 33.4 (25.6, 40.7)              | 30.0 (22.0, 39.7)           |
| Sit-rise score                                                                                                                                                                                                                                                                                                                                                                                                              | 8.0 (6.0, 9.0)             | 8.0 (6.0, 9.0)                | 8.0 (6.0, 9.0)               | 8.0 (6.0, 9.0)                 | 7.5 (5.0, 9.0)              |
| EF at rest, %                                                                                                                                                                                                                                                                                                                                                                                                               | 59.0 (55.8, 60.5)          | 58.8 (55.9, 60.5)             | 59.2 (56.1, 60.5)            | 59.2 (56.0, 61.4)              | 58.9 (56.0, 60.9)           |
| Mean steps in first 30 days*                                                                                                                                                                                                                                                                                                                                                                                                | 8398.0 (6560.6, 10709.6)   | 8172.2 (6220.6, 10335.7)      | 7666.7 (5128.2, 9862.5)      | 7008.4 (4673.5, 9821.8)        | 6498.1 (4684.1, 9044.5)     |
| Coronary calcium score†                                                                                                                                                                                                                                                                                                                                                                                                     | 0.0 (0.0, 33.9)            | 0.0 (0.0, 42.6)               | 0.0 (0.0, 8.8)               | 0.0 (0.0, 7.1)                 | 0.0 (0.0, 1.9)              |
| FEV1/FVC                                                                                                                                                                                                                                                                                                                                                                                                                    | 0.8 (0.7, 0.8)             | 0.8 (0.7, 0.8)                | 0.8 (0.7, 0.8)               | 0.8 (0.7, 0.8)                 | 0.8 (0.7, 0.8)              |
| ABI†                                                                                                                                                                                                                                                                                                                                                                                                                        | 1.1 (1.1, 1.2)             | 1.1 (1.1, 1.2)                | 1.1 (1.1, 1.2)               | 1.1 (1.0, 1.2)                 | 1.1 (1.0, 1.2)              |
| <p>Data presented as median (25th, 75th percentile).<br/> ABI, ankle brachial index; EF, ejection fraction; FEV1, forced expiratory volume in 1 second; FVC, forced vital capacity; PHQ-9, Patient Health Questionnaire.<br/> P-values for trend were calculated with the use of Spearman Correlation or Cochran-Armitage tests, where appropriate.<br/> *P-value for trend &lt;0.01.<br/> †P-value for trend &lt;0.001</p> |                            |                               |                              |                                |                             |



1  
2  
3 **FIGURE LEGENDS**  
4

5 **Figure 1. Top 30 Regression Coefficients**  
6

7 Top 30 regression coefficients for: A) model 1; B) model 2; C) model 3; D) model 4; E) model 5.  
8  
9  
10  
11  
12  
13  
14  
15  
16  
17  
18  
19  
20  
21  
22  
23  
24  
25  
26  
27  
28  
29  
30  
31  
32  
33  
34  
35  
36  
37  
38  
39  
40  
41  
42  
43  
44  
45  
46  
47  
48  
49  
50  
51  
52  
53  
54  
55  
56  
57  
58  
59  
60

For peer review only

**Top 30 Regression Coefficients for Model 1**

Adjusted by Age and Sex

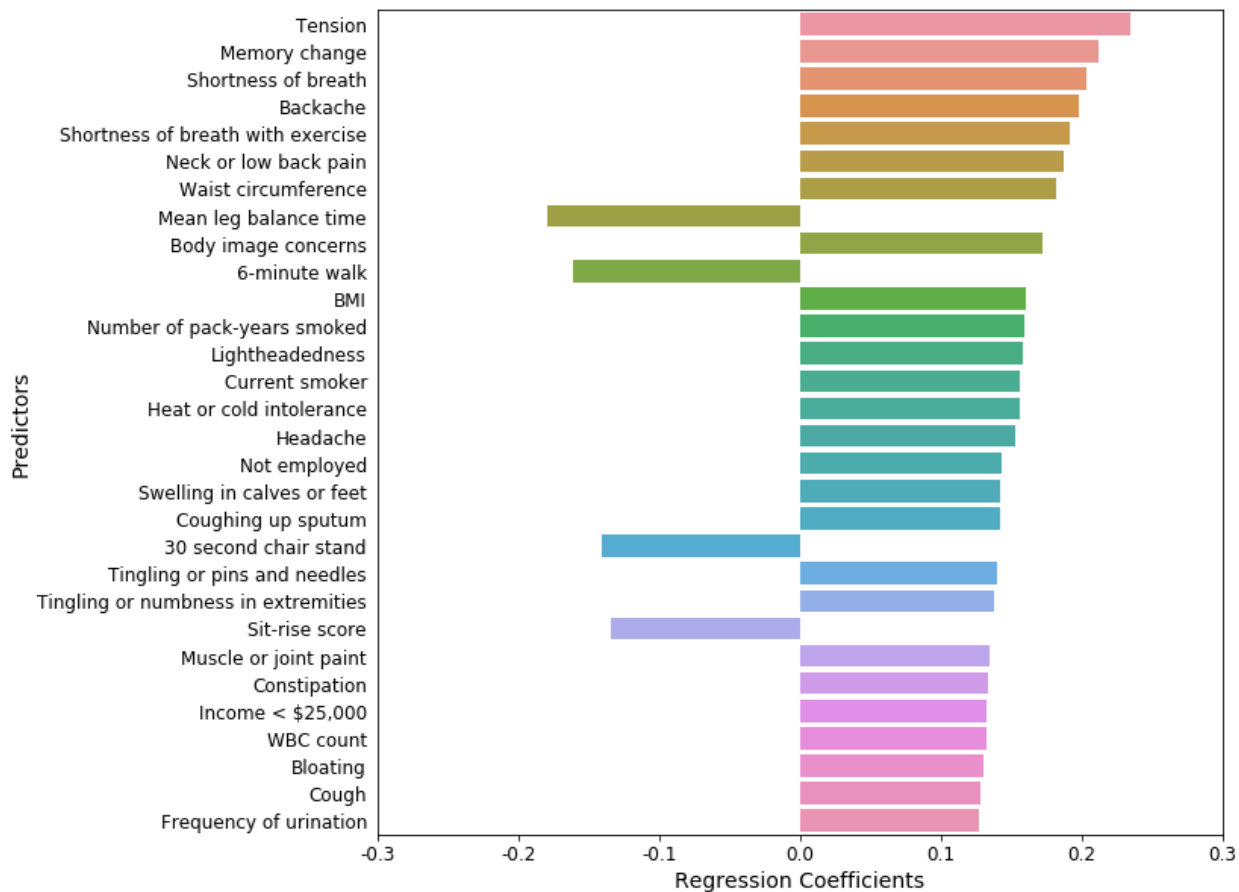

View Only

### Top 30 Regression Coefficients for Model 2

Adjusted by Age, Sex, SES and Health Behavior

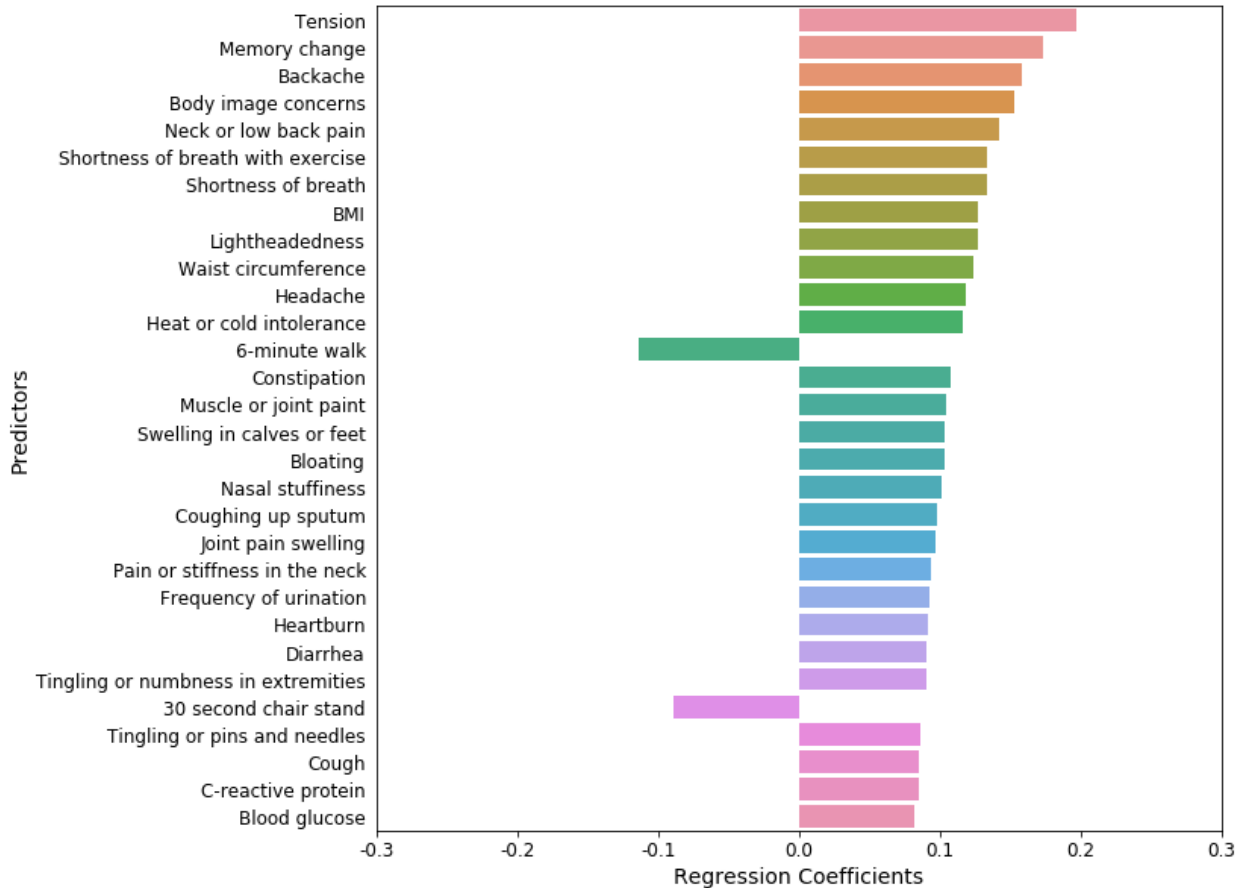

View only

### Top 30 Regression Coefficients for Model 3

Adjusted by Age, Sex, SES, Health Behavior, and Medical Conditions

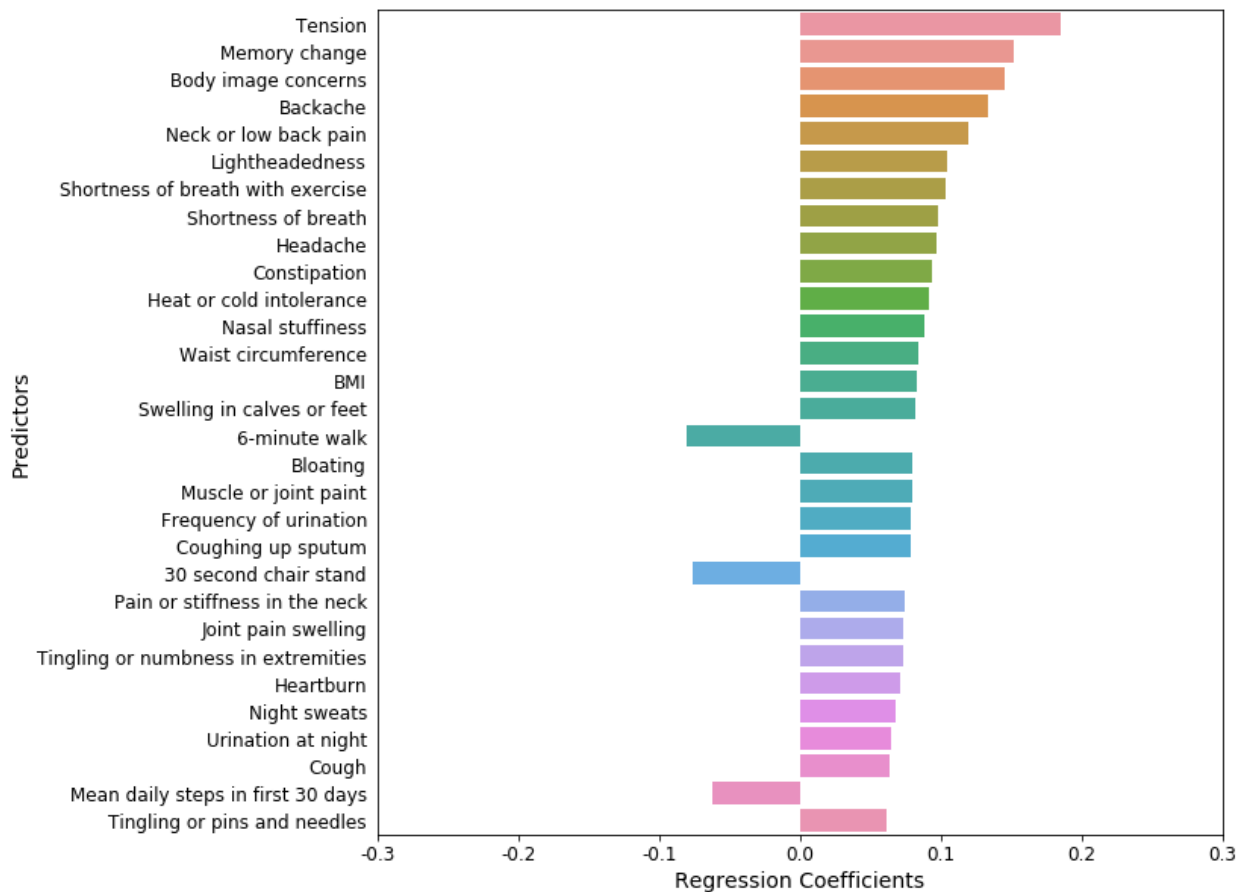

view only

1  
2  
3  
4  
5  
6  
7  
8  
9  
10  
11  
12  
13  
14  
15  
16  
17  
18  
19  
20  
21  
22  
23  
24  
25  
26  
27  
28  
29  
30  
31  
32  
33  
34  
35  
36  
37  
38  
39  
40  
41  
42  
43  
44  
45  
46  
47  
48  
49  
50  
51  
52  
53  
54  
55  
56  
57  
58  
59  
60

### Top 30 Regression Coefficients for Model 4

Adjusted by Age, Sex, SES, Health Behavior, Medical Conditions, Symptoms and Allergies

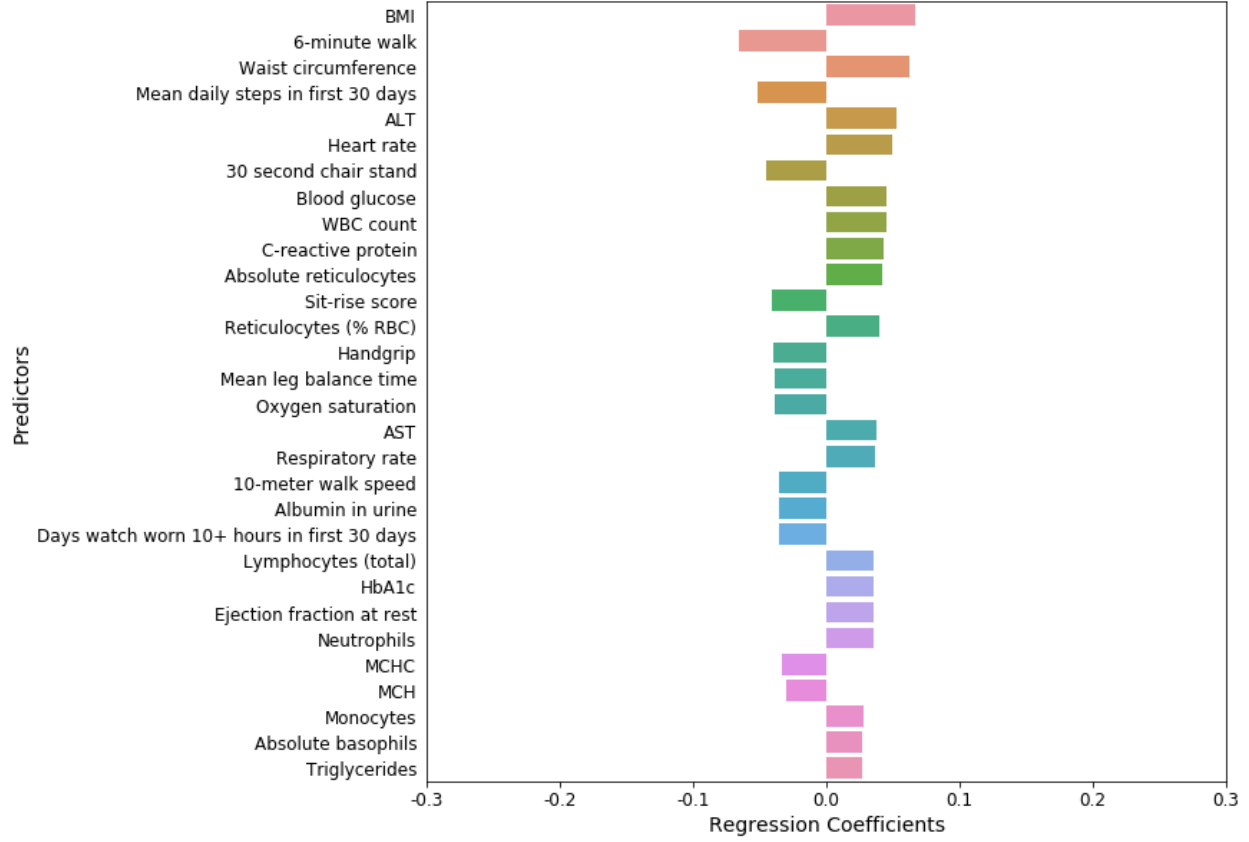

new only

### Top 30 Regression Coefficients for Model 5

Adjusted by Age, Sex, SES, Health Behavior, Medical Conditions, Symptoms, Allergies, and Physical Function

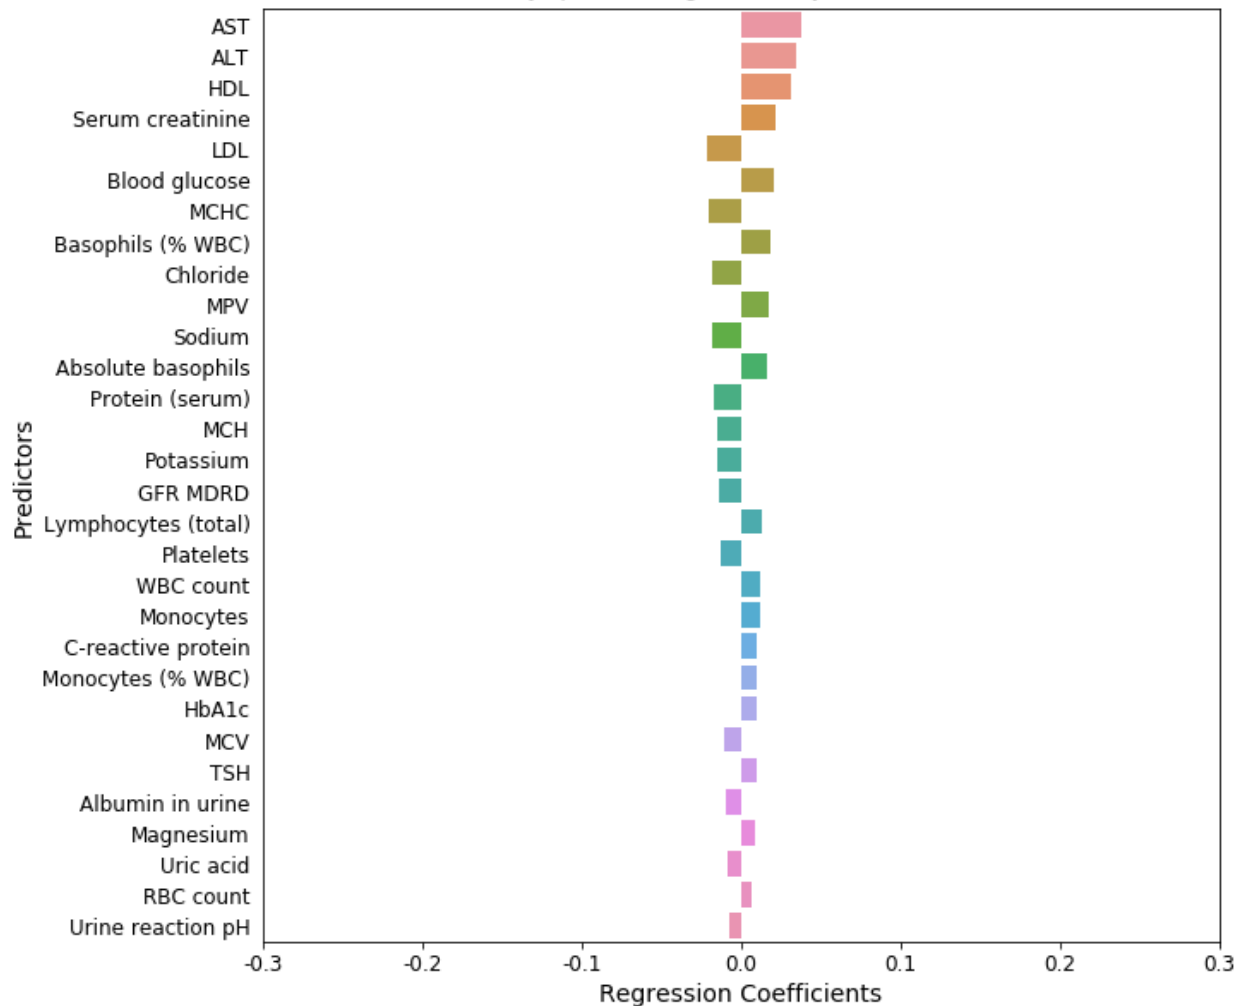

## SUPPLEMENTAL MATERIAL

|    |                                                                                         |           |
|----|-----------------------------------------------------------------------------------------|-----------|
| 1  |                                                                                         |           |
| 2  |                                                                                         |           |
| 3  |                                                                                         |           |
| 4  |                                                                                         |           |
| 5  |                                                                                         |           |
| 6  |                                                                                         |           |
| 7  | <b>eTable 1. Key Variables Included in Each LASSO Covariate Model.....</b>              | <b>2</b>  |
| 8  | <b>eTable 2. Additional Medical History: PHQ-9 Scores .....</b>                         | <b>3</b>  |
| 9  | <b>eTable 3. LASSO Regression Results: Model 1 .....</b>                                | <b>5</b>  |
| 10 | <b>eTable 4. LASSO Regression Results: Model 2.....</b>                                 | <b>9</b>  |
| 11 | <b>eTable 5. LASSO Regression Results: Model 3.....</b>                                 | <b>13</b> |
| 12 | <b>eTable 6. LASSO Regression Results: Model 4.....</b>                                 | <b>16</b> |
| 13 | <b>eTable 7. LASSO Regression Results: Model 5.....</b>                                 | <b>18</b> |
| 14 | <b>eFigure 1A. Distribution of PHQ-9 Across Risk Groups by Asthma .....</b>             | <b>20</b> |
| 15 | <b>eFigure 1B. Distribution of PHQ-9 Across Risk Groups by Backache .....</b>           | <b>21</b> |
| 16 | <b>eFigure 1C. Distribution of PHQ-9 Across Risk Groups by Memory Change.....</b>       | <b>22</b> |
| 17 | <b>eFigure 1D. Distribution of PHQ-9 Across Risk Groups by Body Image Concerns.....</b> | <b>23</b> |
| 18 | <b>eFigure 1E. Distribution of PHQ-9 Across Risk Groups by Sleep Apnea .....</b>        | <b>24</b> |
| 19 |                                                                                         |           |
| 20 |                                                                                         |           |
| 21 |                                                                                         |           |
| 22 |                                                                                         |           |
| 23 |                                                                                         |           |
| 24 |                                                                                         |           |
| 25 |                                                                                         |           |
| 26 |                                                                                         |           |
| 27 |                                                                                         |           |
| 28 |                                                                                         |           |
| 29 |                                                                                         |           |
| 30 |                                                                                         |           |
| 31 |                                                                                         |           |
| 32 |                                                                                         |           |
| 33 |                                                                                         |           |
| 34 |                                                                                         |           |
| 35 |                                                                                         |           |
| 36 |                                                                                         |           |
| 37 |                                                                                         |           |
| 38 |                                                                                         |           |
| 39 |                                                                                         |           |
| 40 |                                                                                         |           |
| 41 |                                                                                         |           |
| 42 |                                                                                         |           |
| 43 |                                                                                         |           |
| 44 |                                                                                         |           |
| 45 |                                                                                         |           |
| 46 |                                                                                         |           |
| 47 |                                                                                         |           |
| 48 |                                                                                         |           |
| 49 |                                                                                         |           |
| 50 |                                                                                         |           |
| 51 |                                                                                         |           |
| 52 |                                                                                         |           |
| 53 |                                                                                         |           |
| 54 |                                                                                         |           |
| 55 |                                                                                         |           |
| 56 |                                                                                         |           |
| 57 |                                                                                         |           |
| 58 |                                                                                         |           |
| 59 |                                                                                         |           |
| 60 |                                                                                         |           |

**eTable 1. Key Variables Included in Each LASSO Covariate Model**

| Variables                                                                                        | Model 1 | Model 2 | Model 3 | Model 4 | Model 5 |
|--------------------------------------------------------------------------------------------------|---------|---------|---------|---------|---------|
| Age, sex and age × sex interaction (Supplemental Table 1.1)                                      | ✓       | ✓       | ✓       | ✓       | ✓       |
| Race and ethnicity (Supplemental Table 1.1)                                                      |         | ✓       | ✓       | ✓       | ✓       |
| Socioeconomic-related variables (Supplemental Table 1.6)                                         |         | ✓       | ✓       | ✓       | ✓       |
| Behavioral-related behaviors (Supplemental Tables 1.1 and 1.6)                                   |         | ✓       | ✓       | ✓       | ✓       |
| Medical conditions <i>not</i> related to mental health / depression (Supplemental Table 1.3)     |         |         | ✓       | ✓       | ✓       |
| Symptoms and allergies <i>not</i> related to mental health / depression (Supplemental Table 1.3) |         |         |         | ✓       | ✓       |
| Physical health metrics (Table Supplemental Tables 1.2 and 1.7)                                  |         |         |         |         | ✓       |
| Standard labs (Supplemental Table 1.5)                                                           |         |         |         |         |         |



**eTable 2. Additional Medical History: PHQ-9 Scores**

|                                  | 0<br>(N=484) | 1–4<br>(N=1086) | 5–9<br>(N=518) | 10–14<br>(N=184) | 15+<br>(N=93) |
|----------------------------------|--------------|-----------------|----------------|------------------|---------------|
| Nonmelanoma skin cancer          | 12 (2.5)     | 42 (3.9)        | 18 (3.5)       | 3 (1.6)          | 0 (0.0)*      |
| Osteoporosis                     | 11 (2.3)     | 47 (4.3)        | 17 (3.3)       | 3 (1.6)          | 0 (0.0)*      |
| Benign prostatic hyperplasia     | 22 (4.5)     | 44 (4.1)        | 17 (3.3)       | 3 (1.6)          | 0 (0.0)*      |
| Melanoma skin cancer             | 11 (2.3)     | 23 (2.1)        | 5 (1.0)        | 0 (0.0)          | 0 (0.0)*      |
| Prostate cancer                  | 12 (2.5)     | 17 (1.6)        | 6 (1.2)        | 1 (0.5)          | 0 (0.0)*      |
| Diabetes type 1                  | 3 (0.6)      | 12 (1.1)        | 4 (0.8)        | 3 (1.6)          | 0 (0.0)       |
| Macular degeneration             | 2 (0.4)      | 20 (1.8)        | 4 (0.8)        | 4 (2.2)          | 0 (0.0)       |
| TIA                              | 7 (1.4)      | 9 (0.8)         | 3 (0.6)        | 3 (1.6)          | 0 (0.0)       |
| Hepatitis B                      | 6 (1.2)      | 10 (0.9)        | 4 (0.8)        | 3 (1.6)          | 0 (0.0)       |
| Coronary artery disease          | 11 (2.3)     | 44 (4.1)        | 13 (2.5)       | 6 (3.3)          | 1 (1.1)       |
| Hashimoto's disease              | 8 (1.7)      | 22 (2.0)        | 11 (2.1)       | 3 (1.6)          | 1 (1.1)       |
| Goiter                           | 7 (1.4)      | 12 (1.1)        | 3 (0.6)        | 0 (0.0)          | 1 (1.1)       |
| Hemorrhoids                      | 11 (2.3)     | 44 (4.1)        | 18 (3.5)       | 4 (2.2)          | 1 (1.1)       |
| Hypothyroidism                   | 42 (8.7)     | 93 (8.6)        | 40 (7.7)       | 9 (4.9)          | 2 (2.2)       |
| Glaucoma                         | 14 (2.9)     | 29 (2.7)        | 10 (1.9)       | 6 (3.3)          | 2 (2.2)       |
| Psoriasis                        | 10 (2.1)     | 16 (1.5)        | 11 (2.1)       | 8 (4.3)          | 2 (2.2)       |
| Peptic ulcer                     | 5 (1.0)      | 22 (2.0)        | 13 (2.5)       | 4 (2.2)          | 2 (2.2)       |
| Diverticulosis                   | 8 (1.7)      | 29 (2.7)        | 10 (1.9)       | 5 (2.7)          | 2 (2.2)       |
| Peripheral vascular disorder     | 1 (0.2)      | 15 (1.4)        | 8 (1.5)        | 2 (1.1)          | 2 (2.2)       |
| Atrial fibrillation              | 4 (0.8)      | 17 (1.6)        | 1 (0.2)        | 1 (0.5)          | 2 (2.2)       |
| Colon polyps                     | 53 (11.0)    | 113 (10.4)      | 52 (10.0)      | 12 (6.5)         | 3 (3.2)       |
| Arrhythmia                       | 20 (4.1)     | 69 (6.4)        | 27 (5.2)       | 8 (4.3)          | 3 (3.2)       |
| Tinnitus                         | 31 (6.4)     | 52 (4.8)        | 35 (6.8)       | 6 (3.3)          | 3 (3.2)       |
| Hearing Loss                     | 29 (6.0)     | 75 (6.9)        | 26 (5.0)       | 12 (6.5)         | 3 (3.2)       |
| Gout                             | 14 (2.9)     | 29 (2.7)        | 14 (2.7)       | 5 (2.7)          | 3 (3.2)       |
| Diverticulitis                   | 3 (0.6)      | 20 (1.8)        | 17 (3.3)       | 3 (1.6)          | 3 (3.2)       |
| Headaches                        | 6 (1.2)      | 18 (1.7)        | 13 (2.5)       | 3 (1.6)          | 3 (3.2)       |
| Epilepsy                         | 5 (1.0)      | 19 (1.7)        | 12 (2.3)       | 5 (2.7)          | 3 (3.2)       |
| Breast cancer                    | 8 (1.7)      | 20 (1.8)        | 9 (1.7)        | 1 (0.5)          | 3 (3.2)       |
| Myocardial infarction            | 6 (1.2)      | 19 (1.7)        | 11 (2.1)       | 1 (0.5)          | 3 (3.2)       |
| Osteopenia                       | 22 (4.5)     | 62 (5.7)        | 22 (4.2)       | 1 (0.5)          | 3 (3.2)       |
| Stroke                           | 5 (1.0)      | 12 (1.1)        | 9 (1.7)        | 1 (0.5)          | 3 (3.2)       |
| Drug abuse*                      | 5 (1.0)      | 14 (1.3)        | 5 (1.0)        | 13 (7.1)         | 4 (4.3)       |
| Pulmonary embolism               | 4 (0.8)      | 17 (1.6)        | 7 (1.4)        | 3 (1.6)          | 4 (4.3)       |
| Nonalcoholic fatty liver disease | 5 (1.0)      | 17 (1.6)        | 16 (3.1)       | 3 (1.6)          | 4 (4.3)       |
| Hepatitis C†                     | 5 (1.0)      | 8 (0.7)         | 3 (0.6)        | 8 (4.3)          | 4 (4.3)       |
| Cataracts                        | 61 (12.6)    | 167 (15.4)      | 63 (12.2)      | 16 (8.7)         | 5 (5.4)       |
| Kidney or bladder stones         | 36 (7.4)     | 66 (6.1)        | 18 (3.5)       | 13 (7.1)         | 5 (5.4)       |

|   |                       |          |          |          |          |
|---|-----------------------|----------|----------|----------|----------|
| 1 |                       |          |          |          |          |
| 2 |                       |          |          |          |          |
| 3 | Concussions           | 19 (3.9) | 62 (5.7) | 35 (6.8) | 13 (7.1) |
| 4 |                       |          |          |          | 5 (5.4)  |
| 5 | Rheumatoid arthritis† | 4 (0.8)  | 13 (1.2) | 12 (2.3) | 4 (2.2)  |
| 6 |                       |          |          |          | 6 (6.5)  |

P-values for trend were calculated with the use of Spearman Correlation or Cochrane-Armitage tests, where appropriate.

\*P-value for trend <0.0001.

†P-value for trend <0.01.

For peer review only

**eTable 3. LASSO Regression Results: Model 1**

| Variable                            | Estimate | P-value  | CI 25%  | CI 75%  |
|-------------------------------------|----------|----------|---------|---------|
| Tension                             | 0.2344   | < 0.0001 | 0.2026  | 0.2661  |
| Memory change                       | 0.2119   | < 0.0001 | 0.1801  | 0.2437  |
| Shortness of breath                 | 0.2033   | < 0.0001 | 0.1714  | 0.2352  |
| Backache                            | 0.1974   | < 0.0001 | 0.1655  | 0.2293  |
| Shortness of breath with exercise   | 0.1914   | < 0.0001 | 0.1594  | 0.2233  |
| Neck or low back pain               | 0.1869   | < 0.0001 | 0.1549  | 0.2189  |
| Waist circumference                 | 0.1814   | < 0.0001 | 0.1480  | 0.2149  |
| Mean leg balance time               | -0.1796  | < 0.0001 | -0.2172 | -0.1420 |
| Body image concerns                 | 0.1726   | < 0.0001 | 0.1403  | 0.2049  |
| 6-minute walk                       | -0.1608  | < 0.0001 | -0.1932 | -0.1284 |
| BMI                                 | 0.1604   | < 0.0001 | 0.1282  | 0.1926  |
| Number of pack-years smoked         | 0.1590   | < 0.0001 | 0.1258  | 0.1922  |
| Lightheadedness                     | 0.1576   | < 0.0001 | 0.1254  | 0.1899  |
| Current smoker                      | 0.1561   | < 0.0001 | 0.1238  | 0.1884  |
| Heat or cold intolerance            | 0.1560   | < 0.0001 | 0.1238  | 0.1882  |
| Headache                            | 0.1532   | < 0.0001 | 0.1205  | 0.1859  |
| Not employed                        | 0.1434   | < 0.0001 | 0.1111  | 0.1757  |
| Swelling in calves or feet          | 0.1421   | < 0.0001 | 0.1098  | 0.1745  |
| Coughing up sputum                  | 0.1416   | < 0.0001 | 0.1093  | 0.1739  |
| 30 second chair stand               | -0.1407  | < 0.0001 | -0.1732 | -0.1081 |
| Tingling or pins and needles        | 0.1403   | < 0.0001 | 0.1079  | 0.1727  |
| Tingling or numbness in extremities | 0.1373   | < 0.0001 | 0.1049  | 0.1697  |
| Sit-rise score                      | -0.1345  | < 0.0001 | -0.1714 | -0.0975 |
| Muscle or joint pain                | 0.1343   | < 0.0001 | 0.1019  | 0.1668  |
| Constipation                        | 0.1334   | < 0.0001 | 0.1010  | 0.1657  |
| Income < \$25,000                   | 0.1325   | < 0.0001 | 0.1001  | 0.1650  |
| WBC count                           | 0.1322   | < 0.0001 | 0.0998  | 0.1647  |
| Bloating                            | 0.1305   | < 0.0001 | 0.0979  | 0.1631  |
| Cough                               | 0.1276   | < 0.0001 | 0.0952  | 0.1601  |
| Frequency of urination              | 0.1274   | < 0.0001 | 0.0945  | 0.1603  |
| Nasal stuffiness                    | 0.1259   | < 0.0001 | 0.0934  | 0.1583  |
| COPD with emphysema                 | 0.1228   | < 0.0001 | 0.0901  | 0.1555  |
| Joint pain swelling                 | 0.1225   | < 0.0001 | 0.0899  | 0.1550  |
| Heartburn                           | 0.1215   | < 0.0001 | 0.0890  | 0.1540  |
| Pain or stiffness in the neck       | 0.1206   | < 0.0001 | 0.0881  | 0.1531  |
| Stiffness                           | 0.1194   | < 0.0001 | 0.0868  | 0.1520  |
| Mean daily steps in first 30 days   | -0.1176  | < 0.0001 | -0.1503 | -0.0848 |
| Heart rate                          | 0.1165   | < 0.0001 | 0.0835  | 0.1495  |
| Urination at night                  | 0.1158   | < 0.0001 | 0.0823  | 0.1492  |
| HbA1c                               | 0.1144   | < 0.0001 | 0.0813  | 0.1476  |
| Diarrhea                            | 0.1138   | < 0.0001 | 0.0812  | 0.1463  |
| 10-meter walk speed                 | -0.1137  | < 0.0001 | -0.1463 | -0.0810 |
| Blood glucose                       | 0.1136   | < 0.0001 | 0.0808  | 0.1463  |
| Oxygen saturation                   | -0.1118  | < 0.0001 | -0.1458 | -0.0777 |

|    |                                    |         |          |         |         |
|----|------------------------------------|---------|----------|---------|---------|
| 1  |                                    |         |          |         |         |
| 2  |                                    |         |          |         |         |
| 3  | Dry mouth                          | 0.1117  | < 0.0001 | 0.0791  | 0.1444  |
| 4  | Night sweats                       | 0.1110  | < 0.0001 | 0.0784  | 0.1435  |
| 5  | C-reactive protein                 | 0.1084  | < 0.0001 | 0.0759  | 0.1409  |
| 6  | Urgency                            | 0.1080  | < 0.0001 | 0.0751  | 0.1410  |
| 7  | Monocytes                          | 0.1075  | < 0.0001 | 0.0742  | 0.1408  |
| 8  | Neutrophils                        | 0.1072  | < 0.0001 | 0.0747  | 0.1398  |
| 9  | Numbness or loss of sensation      | 0.1055  | < 0.0001 | 0.0729  | 0.1380  |
| 10 | GERD                               | 0.1004  | < 0.0001 | 0.0675  | 0.1334  |
| 11 | Itching skin                       | 0.0971  | < 0.0001 | 0.0645  | 0.1297  |
| 12 | Excessive belching or passing of   |         |          |         |         |
| 13 | gas                                | 0.0957  | < 0.0001 | 0.0631  | 0.1283  |
| 14 | Respiratory rate                   | 0.0944  | < 0.0001 | 0.0618  | 0.1270  |
| 15 | Leg cramps                         | 0.0933  | < 0.0001 | 0.0606  | 0.1260  |
| 16 | Urine specific gravity             | 0.0931  | < 0.0001 | 0.0605  | 0.1257  |
| 17 | Albumin in urine                   | -0.0928 | < 0.0001 | -0.1261 | -0.0595 |
| 18 | Dryness                            | 0.0926  | < 0.0001 | 0.0600  | 0.1252  |
| 19 | Absolute basophils                 | 0.0925  | < 0.0001 | 0.0598  | 0.1251  |
| 20 | Uninsured                          | 0.0924  | < 0.0001 | 0.0597  | 0.1250  |
| 21 | Cramping                           | 0.0920  | < 0.0001 | 0.0592  | 0.1248  |
| 22 | Osteoarthritis                     | 0.0917  | < 0.0001 | 0.0568  | 0.1267  |
| 23 | Lymphocytes (total)                | 0.0883  | < 0.0001 | 0.0554  | 0.1213  |
| 24 | Sleep apnea                        | 0.0877  | < 0.0001 | 0.0541  | 0.1213  |
| 25 | ALT                                | 0.0848  | < 0.0001 | 0.0522  | 0.1175  |
| 26 | Married                            | -0.0848 | < 0.0001 | -0.1188 | -0.0508 |
| 27 | Sinus pain                         | 0.0838  | < 0.0001 | 0.0511  | 0.1164  |
| 28 | HDL                                | -0.0835 | < 0.0001 | -0.1161 | -0.0509 |
| 29 | Creatinine (urine)                 | 0.0811  | < 0.0001 | 0.0484  | 0.1138  |
| 30 | Reticulocytes (% RBC)              | 0.0803  | < 0.0001 | 0.0475  | 0.1131  |
| 31 | Triglycerides                      | 0.0800  | < 0.0001 | 0.0471  | 0.1128  |
| 32 | Fibromyalgia                       | 0.0798  | < 0.0001 | 0.0472  | 0.1125  |
| 33 | Asthma                             | 0.0796  | < 0.0001 | 0.0469  | 0.1123  |
| 34 | Former smoker                      | 0.0791  | < 0.0001 | 0.0454  | 0.1127  |
| 35 | Absolute reticulocytes             | 0.0786  | < 0.0001 | 0.0458  | 0.1114  |
| 36 | Diabetes type 2                    | 0.0780  | < 0.0001 | 0.0448  | 0.1111  |
| 37 | Urine reaction pH                  | -0.0762 | < 0.0001 | -0.1095 | -0.0430 |
| 38 | Migraines                          | 0.0753  | < 0.0001 | 0.0425  | 0.1081  |
| 39 | Hypertension                       | 0.0749  | < 0.0001 | 0.0397  | 0.1102  |
| 40 | Runny nose                         | 0.0738  | < 0.0001 | 0.0411  | 0.1065  |
| 41 | Vitamin D                          | -0.0732 | < 0.0001 | -0.1067 | -0.0397 |
| 42 | Easy bruising or bleeding          | 0.0719  | < 0.0001 | 0.0390  | 0.1049  |
| 43 | High school or less education      | 0.0706  | < 0.0001 | 0.0379  | 0.1033  |
| 44 | Floaters                           | 0.0701  | < 0.0001 | 0.0370  | 0.1033  |
| 45 | Discharge                          | 0.0698  | < 0.0001 | 0.0372  | 0.1025  |
| 46 | Ear ringing                        | 0.0671  | < 0.0001 | 0.0338  | 0.1003  |
| 47 | Hemorrhoids (symptom)              | 0.0649  | 0.0001   | 0.0320  | 0.0977  |
| 48 | Days watch worn 10+ hours in first |         |          |         |         |
| 49 | 30 days                            | -0.0639 | 0.0002   | -0.0976 | -0.0301 |
| 50 | Asian race                         | -0.0636 | 0.0002   | -0.0964 | -0.0307 |
| 51 | Absolute eosinophils               | 0.0632  | 0.0002   | 0.0304  | 0.0960  |
| 52 | Seasonal allergies                 | 0.0626  | 0.0002   | 0.0299  | 0.0954  |
| 53 | Medication allergies               | 0.0612  | 0.0003   | 0.0283  | 0.0941  |
| 54 | Irritable bowel disorder           | 0.0585  | 0.0005   | 0.0258  | 0.0912  |
| 55 |                                    |         |          |         |         |
| 56 |                                    |         |          |         |         |
| 57 |                                    |         |          |         |         |
| 58 |                                    |         |          |         |         |
| 59 |                                    |         |          |         |         |
| 60 |                                    |         |          |         |         |

|    |                                  |         |        |         |         |
|----|----------------------------------|---------|--------|---------|---------|
| 1  |                                  |         |        |         |         |
| 2  |                                  |         |        |         |         |
| 3  | Hepatitis C                      | 0.0579  | 0.0005 | 0.0252  | 0.0907  |
| 4  | Rheumatoid arthritis             | 0.0572  | 0.0006 | 0.0244  | 0.0900  |
| 5  | Systolic blood pressure          | 0.0566  | 0.0017 | 0.0212  | 0.0920  |
| 6  | Diverticulitis                   | 0.0561  | 0.0008 | 0.0232  | 0.0890  |
| 7  | Uric acid                        | 0.0538  | 0.0019 | 0.0199  | 0.0876  |
| 8  | Magnesium                        | -0.0537 | 0.0013 | -0.0865 | -0.0209 |
| 9  | MCHC                             | -0.0533 | 0.0015 | -0.0861 | -0.0205 |
| 10 | Handgrip                         | -0.0514 | 0.0021 | -0.0842 | -0.0187 |
| 11 | Gallbladder disease              | 0.0488  | 0.0036 | 0.0160  | 0.0816  |
| 12 | MCH                              | -0.0465 | 0.0065 | -0.0799 | -0.0130 |
| 13 | AST                              | 0.0443  | 0.0080 | 0.0116  | 0.0771  |
| 14 | Epilepsy                         | 0.0427  | 0.0106 | 0.0100  | 0.0755  |
| 15 | Food allergies                   | 0.0424  | 0.0112 | 0.0096  | 0.0752  |
| 16 | Diastolic blood pressure         | 0.0420  | 0.0124 | 0.0091  | 0.0748  |
| 17 | Pneumonia                        | 0.0403  | 0.0163 | 0.0074  | 0.0732  |
| 18 | Nonalcoholic fatty liver disease | 0.0403  | 0.0159 | 0.0075  | 0.0731  |
| 19 | Ejection fraction at rest        | 0.0403  | 0.0161 | 0.0075  | 0.0731  |
| 20 | Non-seasonal allergies           | 0.0393  | 0.0189 | 0.0065  | 0.0722  |
| 21 | Serum creatinine                 | 0.0388  | 0.0239 | 0.0051  | 0.0725  |
| 22 | Protein (serum)                  | -0.0381 | 0.0299 | -0.0725 | -0.0037 |
| 23 | Cataracts                        | 0.0368  | 0.0513 | -0.0002 | 0.0737  |
| 24 | Pulmonary embolism               | 0.0359  | 0.0321 | 0.0031  | 0.0688  |
| 25 | Peripheral vascular disease      | 0.0344  | 0.0401 | 0.0016  | 0.0673  |
| 26 | Hay fever                        | 0.0342  | 0.0413 | 0.0014  | 0.0671  |
| 27 | Stroke                           | 0.0337  | 0.0450 | 0.0008  | 0.0667  |
| 28 | MCV                              | -0.0331 | 0.0529 | -0.0666 | 0.0004  |
| 29 | Diverticulosis                   | 0.0324  | 0.0541 | -0.0006 | 0.0655  |
| 30 | Arrhythmia                       | 0.0324  | 0.0584 | -0.0012 | 0.0659  |
| 31 | Gout                             | 0.0323  | 0.0570 | -0.0010 | 0.0655  |
| 32 | Myocardial infarction            | 0.0317  | 0.0606 | -0.0014 | 0.0649  |
| 33 | Cholesterol                      | -0.0305 | 0.0685 | -0.0633 | 0.0023  |
| 34 | Platelets                        | 0.0303  | 0.0783 | -0.0034 | 0.0640  |
| 35 | LDL                              | -0.0301 | 0.0726 | -0.0630 | 0.0028  |
| 36 | Peptic ulcer                     | 0.0300  | 0.0730 | -0.0028 | 0.0628  |
| 37 | Hypercholesterolemia             | 0.0297  | 0.0879 | -0.0044 | 0.0638  |
| 38 | Goiter                           | -0.0290 | 0.0836 | -0.0618 | 0.0039  |
| 39 | Coronary artery disease          | 0.0287  | 0.0959 | -0.0051 | 0.0625  |
| 40 | Chloride                         | -0.0268 | 0.1096 | -0.0596 | 0.0060  |
| 41 | Neutrophil lymphocyte ratio      | 0.0266  | 0.1156 | -0.0065 | 0.0597  |
| 42 | Basophils (% WBC)                | 0.0258  | 0.1242 | -0.0071 | 0.0587  |
| 43 | Chronic headaches                | 0.0258  | 0.1236 | -0.0070 | 0.0586  |
| 44 | Nonmelanoma skin cancer          | 0.0233  | 0.1738 | -0.0103 | 0.0569  |
| 45 | Hearing loss                     | 0.0229  | 0.1869 | -0.0111 | 0.0568  |
| 46 | MPV                              | 0.0224  | 0.1802 | -0.0104 | 0.0552  |
| 47 | AUDIT-C sum score                | -0.0219 | 0.1897 | -0.0547 | 0.0109  |
| 48 | Benign prostatic hyperplasia     | 0.0218  | 0.2273 | -0.0136 | 0.0571  |
| 49 | Eosinophils (% WBC)              | 0.0216  | 0.2001 | -0.0114 | 0.0545  |
| 50 | Hypothyroidism                   | -0.0213 | 0.2064 | -0.0544 | 0.0118  |
| 51 | Macular degeneration             | 0.0209  | 0.2140 | -0.0121 | 0.0540  |
| 52 | Left ventricular mass index      | 0.0197  | 0.2623 | -0.0147 | 0.0541  |
| 53 | Hemoglobin                       | -0.0181 | 0.2868 | -0.0515 | 0.0153  |
| 54 |                                  |         |        |         |         |
| 55 |                                  |         |        |         |         |
| 56 |                                  |         |        |         |         |
| 57 |                                  |         |        |         |         |
| 58 |                                  |         |        |         |         |
| 59 |                                  |         |        |         |         |
| 60 |                                  |         |        |         |         |

|    |                             |         |        |         |        |
|----|-----------------------------|---------|--------|---------|--------|
| 1  |                             |         |        |         |        |
| 2  |                             |         |        |         |        |
| 3  | RBC count                   | 0.0180  | 0.2814 | -0.0148 | 0.0508 |
| 4  | Psoriasis                   | 0.0170  | 0.3108 | -0.0158 | 0.0497 |
| 5  | Lymphocytes (% WBC)         | -0.0166 | 0.3270 | -0.0499 | 0.0166 |
| 6  | Kidney or bladder stones    | -0.0159 | 0.3448 | -0.0490 | 0.0171 |
| 7  | Glaucoma                    | 0.0157  | 0.3547 | -0.0175 | 0.0489 |
| 8  | Hemorrhoids                 | 0.0152  | 0.3649 | -0.0177 | 0.0482 |
| 9  | Coronary calcium score      | 0.0144  | 0.4287 | -0.0213 | 0.0502 |
| 10 | Other race                  | 0.0131  | 0.4445 | -0.0204 | 0.0466 |
| 11 | Colon polyps                | 0.0120  | 0.4975 | -0.0227 | 0.0467 |
| 12 | Breast cancer               | 0.0118  | 0.4826 | -0.0211 | 0.0446 |
| 13 | Melanoma skin cancer        | -0.0117 | 0.4889 | -0.0450 | 0.0215 |
| 14 | Sodium                      | -0.0117 | 0.4856 | -0.0446 | 0.0212 |
| 15 | Calcium                     | -0.0115 | 0.4909 | -0.0443 | 0.0213 |
| 16 | Hashimotos Disease          | -0.0108 | 0.5175 | -0.0436 | 0.0220 |
| 17 | Transient ischemic attack   | -0.0087 | 0.6029 | -0.0417 | 0.0242 |
| 18 | Osteopenia                  | -0.0076 | 0.6521 | -0.0408 | 0.0256 |
| 19 | Atrial fibrillation         | 0.0075  | 0.6601 | -0.0258 | 0.0407 |
| 20 | Neutrophil segments (% WBC) | 0.0071  | 0.6714 | -0.0257 | 0.0399 |
| 21 | Total neutrophils (% WBC)   | 0.0071  | 0.6714 | -0.0257 | 0.0399 |
| 22 | TSH                         | 0.0069  | 0.6786 | -0.0259 | 0.0397 |
| 23 | Potassium                   | -0.0060 | 0.7193 | -0.0390 | 0.0269 |
| 24 | Hematocrit                  | -0.0049 | 0.7722 | -0.0383 | 0.0285 |
| 25 | Monocytes (% WBC)           | 0.0041  | 0.8177 | -0.0305 | 0.0386 |
| 26 | Osteoporosis                | -0.0039 | 0.8192 | -0.0369 | 0.0292 |
| 27 | GFR MDRD                    | 0.0030  | 0.8737 | -0.0343 | 0.0403 |
| 28 | Tinnitus                    | 0.0029  | 0.8627 | -0.0304 | 0.0362 |
| 29 | Diabetes type 1             | -0.0027 | 0.8707 | -0.0356 | 0.0301 |
| 30 | Hispanic ethnicity          | -0.0023 | 0.8914 | -0.0360 | 0.0314 |
| 31 | Hepatitis B                 | -0.0022 | 0.8963 | -0.0351 | 0.0307 |
| 32 | Prostate cancer             | -0.0009 | 0.9575 | -0.0348 | 0.0329 |
| 33 | Black race                  | 0.0004  | 0.9790 | -0.0325 | 0.0334 |
| 34 |                             |         |        |         |        |
| 35 |                             |         |        |         |        |
| 36 |                             |         |        |         |        |
| 37 |                             |         |        |         |        |
| 38 |                             |         |        |         |        |
| 39 |                             |         |        |         |        |
| 40 |                             |         |        |         |        |
| 41 |                             |         |        |         |        |
| 42 |                             |         |        |         |        |
| 43 |                             |         |        |         |        |
| 44 |                             |         |        |         |        |
| 45 |                             |         |        |         |        |
| 46 |                             |         |        |         |        |
| 47 |                             |         |        |         |        |
| 48 |                             |         |        |         |        |
| 49 |                             |         |        |         |        |
| 50 |                             |         |        |         |        |
| 51 |                             |         |        |         |        |
| 52 |                             |         |        |         |        |
| 53 |                             |         |        |         |        |
| 54 |                             |         |        |         |        |
| 55 |                             |         |        |         |        |
| 56 |                             |         |        |         |        |
| 57 |                             |         |        |         |        |
| 58 |                             |         |        |         |        |
| 59 |                             |         |        |         |        |
| 60 |                             |         |        |         |        |

**eTable 4. LASSO Regression Results: Model 2**

| Variable                             | Estimate | P-value  | CI 25%  | CI 75%  |
|--------------------------------------|----------|----------|---------|---------|
| Tension                              | 0.1970   | < 0.0001 | 0.1659  | 0.2282  |
| Memory change                        | 0.1732   | < 0.0001 | 0.1423  | 0.2040  |
| Backache                             | 0.1585   | < 0.0001 | 0.1273  | 0.1898  |
| Body image concerns                  | 0.1527   | < 0.0001 | 0.1216  | 0.1837  |
| Neck or low back pain                | 0.1419   | < 0.0001 | 0.1105  | 0.1733  |
| Shortness of breath with exercise    | 0.1336   | < 0.0001 | 0.1019  | 0.1652  |
| Shortness of breath                  | 0.1329   | < 0.0001 | 0.1011  | 0.1646  |
| BMI                                  | 0.1269   | < 0.0001 | 0.0958  | 0.1581  |
| Lightheadedness                      | 0.1268   | < 0.0001 | 0.0955  | 0.1581  |
| Waist circumference                  | 0.1235   | < 0.0001 | 0.0925  | 0.1545  |
| Headache                             | 0.1188   | < 0.0001 | 0.0871  | 0.1505  |
| Heat or cold intolerance             | 0.1159   | < 0.0001 | 0.0845  | 0.1472  |
| 6-minute walk                        | -0.1139  | < 0.0001 | -0.1451 | -0.0827 |
| Constipation                         | 0.1078   | < 0.0001 | 0.0766  | 0.1391  |
| Muscle or joint pain                 | 0.1044   | < 0.0001 | 0.0732  | 0.1356  |
| Swelling in calves or feet           | 0.1036   | < 0.0001 | 0.0723  | 0.1349  |
| Bloating                             | 0.1036   | < 0.0001 | 0.0721  | 0.1351  |
| Nasal stuffiness                     | 0.1014   | < 0.0001 | 0.0702  | 0.1326  |
| Coughing up sputum                   | 0.0978   | < 0.0001 | 0.0663  | 0.1293  |
| Joint pain swelling                  | 0.0971   | < 0.0001 | 0.0659  | 0.1282  |
| Pain or stiffness in the neck        | 0.0937   | < 0.0001 | 0.0623  | 0.1250  |
| Frequency of urination               | 0.0927   | < 0.0001 | 0.0615  | 0.1238  |
| Heartburn                            | 0.0913   | < 0.0001 | 0.0599  | 0.1227  |
| Diarrhea                             | 0.0903   | < 0.0001 | 0.0589  | 0.1216  |
| Tingling or numbness in extremities  | 0.0900   | < 0.0001 | 0.0586  | 0.1214  |
| 30 second chair stand                | -0.0893  | < 0.0001 | -0.1207 | -0.0580 |
| Tingling or pins and needles         | 0.0859   | < 0.0001 | 0.0543  | 0.1176  |
| Cough                                | 0.0855   | < 0.0001 | 0.0539  | 0.1170  |
| C-reactive protein                   | 0.0847   | < 0.0001 | 0.0534  | 0.1161  |
| Blood glucose                        | 0.0819   | < 0.0001 | 0.0506  | 0.1131  |
| Night sweats                         | 0.0811   | < 0.0001 | 0.0497  | 0.1125  |
| Stiffness                            | 0.0806   | < 0.0001 | 0.0492  | 0.1119  |
| Mean leg balance time                | -0.0777  | < 0.0001 | -0.1090 | -0.0464 |
| HbA1c                                | 0.0772   | < 0.0001 | 0.0460  | 0.1084  |
| Heart rate                           | 0.0771   | < 0.0001 | 0.0450  | 0.1092  |
| Urination at night                   | 0.0770   | < 0.0001 | 0.0458  | 0.1082  |
| ALT                                  | 0.0751   | < 0.0001 | 0.0439  | 0.1063  |
| Mean daily steps in first 30 days    | -0.0745  | < 0.0001 | -0.1058 | -0.0432 |
| Urgency                              | 0.0743   | < 0.0001 | 0.0430  | 0.1055  |
| Excessive belching or passing of gas | 0.0739   | < 0.0001 | 0.0426  | 0.1052  |
| GERD                                 | 0.0727   | < 0.0001 | 0.0414  | 0.1039  |
| 10-meter walk speed                  | -0.0721  | < 0.0001 | -0.1035 | -0.0407 |
| Dry mouth                            | 0.0718   | < 0.0001 | 0.0404  | 0.1032  |



|    |                                    |         |          |         |         |
|----|------------------------------------|---------|----------|---------|---------|
| 1  |                                    |         |          |         |         |
| 2  |                                    |         |          |         |         |
| 3  | Asthma                             | 0.0715  | < 0.0001 | 0.0403  | 0.1028  |
| 4  | Sleep apnea                        | 0.0711  | < 0.0001 | 0.0397  | 0.1024  |
| 5  | Itching skin                       | 0.0682  | < 0.0001 | 0.0368  | 0.0997  |
| 6  | Sit-rise score                     | -0.0663 | < 0.0001 | -0.0978 | -0.0348 |
| 7  | WBC count                          | 0.0653  | < 0.0001 | 0.0327  | 0.0979  |
| 8  | MCH                                | -0.0653 | < 0.0001 | -0.0965 | -0.0340 |
| 9  | Sinus pain                         | 0.0652  | < 0.0001 | 0.0338  | 0.0966  |
| 10 | Urine specific gravity             | 0.0651  | < 0.0001 | 0.0338  | 0.0965  |
| 11 | Respiratory rate                   | 0.0646  | < 0.0001 | 0.0332  | 0.0960  |
| 12 | Absolute reticulocytes             | 0.0634  | < 0.0001 | 0.0319  | 0.0948  |
| 13 | Leg cramps                         | 0.0632  | < 0.0001 | 0.0319  | 0.0945  |
| 14 | Dryness                            | 0.0622  | 0.0001   | 0.0307  | 0.0937  |
| 15 | Numbness or loss of sensation      | 0.0615  | 0.0001   | 0.0299  | 0.0930  |
| 16 | Creatinine (urine)                 | 0.0611  | 0.0001   | 0.0297  | 0.0925  |
| 17 | Cramping                           | 0.0602  | 0.0002   | 0.0284  | 0.0920  |
| 18 | Reticulocytes (% RBC)              | 0.0601  | 0.0002   | 0.0286  | 0.0916  |
| 19 | Oxygen saturation                  | -0.0597 | 0.0002   | -0.0910 | -0.0284 |
| 20 | Albumin in urine                   | -0.0581 | 0.0003   | -0.0894 | -0.0268 |
| 21 | Migraines                          | 0.0581  | 0.0003   | 0.0266  | 0.0896  |
| 22 | MCV                                | -0.0578 | 0.0003   | -0.0891 | -0.0266 |
| 23 | Osteoarthritis                     | 0.0561  | 0.0005   | 0.0247  | 0.0876  |
| 24 | Seasonal allergies                 | 0.0556  | 0.0005   | 0.0243  | 0.0868  |
| 25 | HDL                                | -0.0534 | 0.0009   | -0.0848 | -0.0220 |
| 26 | Hemorrhoids (symptom)              | 0.0528  | 0.0009   | 0.0215  | 0.0841  |
| 27 | Fibromyalgia                       | 0.0525  | 0.0011   | 0.0211  | 0.0840  |
| 28 | Lymphocytes (total)                | 0.0518  | 0.0015   | 0.0198  | 0.0838  |
| 29 | Runny nose                         | 0.0515  | 0.0013   | 0.0201  | 0.0828  |
| 30 | Irritable bowel disorder           | 0.0513  | 0.0013   | 0.0200  | 0.0826  |
| 31 | Ear ringing                        | 0.0498  | 0.0019   | 0.0184  | 0.0811  |
| 32 | Vitamin D                          | -0.0497 | 0.0023   | -0.0816 | -0.0178 |
| 33 | Days watch worn 10+ hours in first |         |          |         |         |
| 34 | 30 days                            | -0.0495 | 0.0023   | -0.0813 | -0.0177 |
| 35 | COPD with emphysema                | 0.0488  | 0.0027   | 0.0170  | 0.0807  |
| 36 | Food allergies                     | 0.0483  | 0.0025   | 0.0170  | 0.0796  |
| 37 | MCHC                               | -0.0483 | 0.0025   | -0.0797 | -0.0170 |
| 38 | Hypertension                       | 0.0479  | 0.0030   | 0.0162  | 0.0795  |
| 39 | Urine reaction pH                  | -0.0473 | 0.0031   | -0.0787 | -0.0160 |
| 40 | Triglycerides                      | 0.0470  | 0.0033   | 0.0156  | 0.0783  |
| 41 | Monocytes                          | 0.0465  | 0.0037   | 0.0151  | 0.0779  |
| 42 | Neutrophils                        | 0.0462  | 0.0049   | 0.0140  | 0.0785  |
| 43 | Serum creatinine                   | 0.0460  | 0.0044   | 0.0143  | 0.0777  |
| 44 | Uric acid                          | 0.0460  | 0.0043   | 0.0144  | 0.0775  |
| 45 | Diabetes type 2                    | 0.0456  | 0.0044   | 0.0143  | 0.0769  |
| 46 | AST                                | 0.0447  | 0.0052   | 0.0134  | 0.0760  |
| 47 | Discharge                          | 0.0446  | 0.0054   | 0.0132  | 0.0760  |
| 48 | Non-seasonal allergies             | 0.0445  | 0.0053   | 0.0132  | 0.0759  |
| 49 | Diverticulitis                     | 0.0432  | 0.0069   | 0.0119  | 0.0745  |
| 50 | Floaters                           | 0.0421  | 0.0084   | 0.0108  | 0.0734  |
| 51 | Absolute basophils                 | 0.0417  | 0.0098   | 0.0101  | 0.0734  |
| 52 | Ejection fraction at rest          | 0.0415  | 0.0094   | 0.0102  | 0.0729  |
| 53 | Easy bruising or bleeding          | 0.0354  | 0.0272   | 0.0040  | 0.0667  |
| 54 | Medication allergies               | 0.0345  | 0.0311   | 0.0031  | 0.0658  |
| 55 |                                    |         |          |         |         |
| 56 |                                    |         |          |         |         |
| 57 |                                    |         |          |         |         |
| 58 |                                    |         |          |         |         |
| 59 |                                    |         |          |         |         |
| 60 |                                    |         |          |         |         |



|    |                                  |         |        |         |        |
|----|----------------------------------|---------|--------|---------|--------|
| 1  |                                  |         |        |         |        |
| 2  |                                  |         |        |         |        |
| 3  | Epilepsy                         | 0.0318  | 0.0471 | 0.0004  | 0.0631 |
| 4  | Systolic blood pressure          | 0.0316  | 0.0505 | -0.0001 | 0.0632 |
| 5  | Chloride                         | -0.0308 | 0.0544 | -0.0621 | 0.0006 |
| 6  | Nonalcoholic fatty liver disease | 0.0303  | 0.0578 | -0.0010 | 0.0617 |
| 7  | Arrhythmia                       | 0.0299  | 0.0629 | -0.0016 | 0.0614 |
| 8  | RBC count                        | 0.0296  | 0.0641 | -0.0017 | 0.0610 |
| 9  | Kidney or bladder stones         | -0.0288 | 0.0721 | -0.0601 | 0.0026 |
| 10 | Chronic headaches                | 0.0285  | 0.0746 | -0.0028 | 0.0599 |
| 11 | Rheumatoid arthritis             | 0.0280  | 0.0808 | -0.0034 | 0.0594 |
| 12 | Hay fever                        | 0.0279  | 0.0815 | -0.0035 | 0.0592 |
| 13 | Benign prostatic hyperplasia     | 0.0274  | 0.0946 | -0.0047 | 0.0596 |
| 14 | Cholesterol                      | -0.0267 | 0.0947 | -0.0581 | 0.0046 |
| 15 | Absolute eosinophils             | 0.0265  | 0.0983 | -0.0049 | 0.0580 |
| 16 | Diverticulosis                   | 0.0262  | 0.1013 | -0.0051 | 0.0576 |
| 17 | Goiter                           | -0.0261 | 0.1034 | -0.0574 | 0.0053 |
| 18 | Magnesium                        | -0.0258 | 0.1099 | -0.0574 | 0.0058 |
| 19 | Gout                             | 0.0255  | 0.1116 | -0.0059 | 0.0569 |
| 20 | LDL                              | -0.0246 | 0.1238 | -0.0560 | 0.0067 |
| 21 | Hepatitis C                      | 0.0239  | 0.1373 | -0.0076 | 0.0554 |
| 22 | Diastolic blood pressure         | 0.0232  | 0.1467 | -0.0081 | 0.0546 |
| 23 | Peripheral vascular disease      | 0.0230  | 0.1508 | -0.0084 | 0.0543 |
| 24 | Hypercholesterolemia             | 0.0227  | 0.1598 | -0.0089 | 0.0543 |
| 25 | Hemoglobin                       | -0.0225 | 0.1601 | -0.0540 | 0.0089 |
| 26 | Nonmelanoma skin cancer          | 0.0212  | 0.1869 | -0.0103 | 0.0528 |
| 27 | MPV                              | 0.0211  | 0.1861 | -0.0102 | 0.0525 |
| 28 | Hearing loss                     | 0.0210  | 0.1924 | -0.0106 | 0.0527 |
| 29 | Hypothyroidism                   | -0.0209 | 0.1930 | -0.0523 | 0.0106 |
| 30 | Handgrip                         | -0.0205 | 0.2025 | -0.0522 | 0.0111 |
| 31 | Pulmonary embolism               | 0.0194  | 0.2246 | -0.0119 | 0.0508 |
| 32 | Cataracts                        | 0.0186  | 0.2549 | -0.0134 | 0.0507 |
| 33 | Glaucoma                         | 0.0186  | 0.2477 | -0.0129 | 0.0501 |
| 34 | Sodium                           | -0.0167 | 0.2976 | -0.0480 | 0.0147 |
| 35 | Pneumonia                        | 0.0166  | 0.3007 | -0.0148 | 0.0479 |
| 36 | Potassium                        | -0.0153 | 0.3403 | -0.0466 | 0.0161 |
| 37 | Macular degeneration             | 0.0140  | 0.3806 | -0.0173 | 0.0454 |
| 38 | Protein (serum)                  | -0.0139 | 0.3870 | -0.0454 | 0.0176 |
| 39 | Stroke                           | 0.0133  | 0.4058 | -0.0181 | 0.0447 |
| 40 | Hemorrhoids                      | 0.0132  | 0.4094 | -0.0182 | 0.0446 |
| 41 | Coronary artery disease          | 0.0123  | 0.4424 | -0.0191 | 0.0438 |
| 42 | Basophils (% WBC)                | 0.0118  | 0.4593 | -0.0195 | 0.0432 |
| 43 | Hematocrit                       | -0.0117 | 0.4667 | -0.0431 | 0.0198 |
| 44 | Psoriasis                        | 0.0109  | 0.4946 | -0.0204 | 0.0423 |
| 45 | Myocardial infarction            | 0.0104  | 0.5153 | -0.0210 | 0.0418 |
| 46 | Eosinophils (% WBC)              | 0.0104  | 0.5158 | -0.0210 | 0.0418 |
| 47 | Peptic ulcer                     | 0.0102  | 0.5244 | -0.0212 | 0.0416 |
| 48 | Breast cancer                    | 0.0101  | 0.5287 | -0.0213 | 0.0414 |
| 49 | Neutrophil lymphocyte ratio      | 0.0100  | 0.5337 | -0.0214 | 0.0413 |
| 50 | Melanoma skin cancer             | -0.0099 | 0.5384 | -0.0414 | 0.0216 |
| 51 | Calcium                          | -0.0098 | 0.5396 | -0.0412 | 0.0215 |
| 52 | Transient ischemic attack        | -0.0090 | 0.5746 | -0.0404 | 0.0224 |
| 53 | Coronary calcium score           | -0.0085 | 0.6007 | -0.0401 | 0.0232 |
| 54 |                                  |         |        |         |        |
| 55 |                                  |         |        |         |        |
| 56 |                                  |         |        |         |        |
| 57 |                                  |         |        |         |        |
| 58 |                                  |         |        |         |        |
| 59 |                                  |         |        |         |        |
| 60 |                                  |         |        |         |        |

|    |                             |         |        |         |        |
|----|-----------------------------|---------|--------|---------|--------|
| 1  |                             |         |        |         |        |
| 2  |                             |         |        |         |        |
| 3  | Left ventricular mass index | 0.0082  | 0.6113 | -0.0234 | 0.0398 |
| 4  | Gallbladder disease         | 0.0081  | 0.6131 | -0.0234 | 0.0397 |
| 5  | TSH                         | 0.0081  | 0.6117 | -0.0232 | 0.0395 |
| 6  | Tinnitus                    | 0.0081  | 0.6138 | -0.0234 | 0.0397 |
| 7  | Osteoporosis                | -0.0081 | 0.6139 | -0.0395 | 0.0233 |
| 8  | GFR MDRD                    | 0.0075  | 0.6465 | -0.0247 | 0.0398 |
| 9  | Colon polyps                | 0.0074  | 0.6490 | -0.0244 | 0.0391 |
| 10 | Hashimotos Disease          | -0.0073 | 0.6467 | -0.0387 | 0.0240 |
| 11 | Neutrophil segments (% WBC) | -0.0072 | 0.6530 | -0.0386 | 0.0242 |
| 12 | Total neutrophils (% WBC)   | -0.0072 | 0.6530 | -0.0386 | 0.0242 |
| 13 | Platelets                   | 0.0059  | 0.7162 | -0.0261 | 0.0380 |
| 14 | Atrial fibrillation         | 0.0056  | 0.7273 | -0.0259 | 0.0371 |
| 15 | Osteopenia                  | -0.0046 | 0.7748 | -0.0361 | 0.0269 |
| 16 | Diabetes type 1             | 0.0039  | 0.8093 | -0.0275 | 0.0352 |
| 17 | Lymphocytes (% WBC)         | 0.0038  | 0.8133 | -0.0276 | 0.0351 |
| 18 | Hepatitis B                 | 0.0030  | 0.8507 | -0.0284 | 0.0344 |
| 19 | Monocytes (% WBC)           | 0.0030  | 0.8543 | -0.0288 | 0.0348 |
| 20 | Prostate cancer             | 0.0030  | 0.8543 | -0.0287 | 0.0347 |
| 21 |                             |         |        |         |        |
| 22 |                             |         |        |         |        |
| 23 |                             |         |        |         |        |
| 24 |                             |         |        |         |        |
| 25 |                             |         |        |         |        |
| 26 |                             |         |        |         |        |
| 27 |                             |         |        |         |        |
| 28 |                             |         |        |         |        |
| 29 |                             |         |        |         |        |
| 30 |                             |         |        |         |        |
| 31 |                             |         |        |         |        |
| 32 |                             |         |        |         |        |
| 33 |                             |         |        |         |        |
| 34 |                             |         |        |         |        |
| 35 |                             |         |        |         |        |
| 36 |                             |         |        |         |        |
| 37 |                             |         |        |         |        |
| 38 |                             |         |        |         |        |
| 39 |                             |         |        |         |        |
| 40 |                             |         |        |         |        |
| 41 |                             |         |        |         |        |
| 42 |                             |         |        |         |        |
| 43 |                             |         |        |         |        |
| 44 |                             |         |        |         |        |
| 45 |                             |         |        |         |        |
| 46 |                             |         |        |         |        |
| 47 |                             |         |        |         |        |
| 48 |                             |         |        |         |        |
| 49 |                             |         |        |         |        |
| 50 |                             |         |        |         |        |
| 51 |                             |         |        |         |        |
| 52 |                             |         |        |         |        |
| 53 |                             |         |        |         |        |
| 54 |                             |         |        |         |        |
| 55 |                             |         |        |         |        |
| 56 |                             |         |        |         |        |
| 57 |                             |         |        |         |        |
| 58 |                             |         |        |         |        |
| 59 |                             |         |        |         |        |
| 60 |                             |         |        |         |        |

**eTable 5. LASSO Regression Results: Model 3**

| Variable                             | Estimate | P-value  | CI 25%  | CI 75%  |
|--------------------------------------|----------|----------|---------|---------|
| Tension                              | 0.1847   | < 0.0001 | 0.1543  | 0.2152  |
| Memory change                        | 0.1511   | < 0.0001 | 0.1207  | 0.1816  |
| Body image concerns                  | 0.1457   | < 0.0001 | 0.1154  | 0.1760  |
| Backache                             | 0.1336   | < 0.0001 | 0.1026  | 0.1645  |
| Neck or low back pain                | 0.1191   | < 0.0001 | 0.0881  | 0.1501  |
| Lightheadedness                      | 0.1047   | < 0.0001 | 0.0739  | 0.1355  |
| Shortness of breath with exercise    | 0.1028   | < 0.0001 | 0.0713  | 0.1343  |
| Shortness of breath                  | 0.0976   | < 0.0001 | 0.0657  | 0.1294  |
| Headache                             | 0.0967   | < 0.0001 | 0.0655  | 0.1280  |
| Constipation                         | 0.0932   | < 0.0001 | 0.0627  | 0.1238  |
| Heat or cold intolerance             | 0.0918   | < 0.0001 | 0.0609  | 0.1227  |
| Nasal stuffiness                     | 0.0880   | < 0.0001 | 0.0574  | 0.1185  |
| Waist circumference                  | 0.0834   | < 0.0001 | 0.0528  | 0.1141  |
| BMI                                  | 0.0829   | < 0.0001 | 0.0517  | 0.1142  |
| Swelling in calves or feet           | 0.0816   | < 0.0001 | 0.0508  | 0.1124  |
| 6-minute walk                        | -0.0801  | < 0.0001 | -0.1111 | -0.0491 |
| Bloating                             | 0.0795   | < 0.0001 | 0.0484  | 0.1106  |
| Muscle or joint pain                 | 0.0791   | < 0.0001 | 0.0484  | 0.1098  |
| Frequency of urination               | 0.0786   | < 0.0001 | 0.0482  | 0.1091  |
| Coughing up sputum                   | 0.0781   | < 0.0001 | 0.0471  | 0.1090  |
| 30 second chair stand                | -0.0762  | < 0.0001 | -0.1068 | -0.0455 |
| Pain or stiffness in the neck        | 0.0745   | < 0.0001 | 0.0438  | 0.1053  |
| Joint pain swelling                  | 0.0735   | < 0.0001 | 0.0428  | 0.1041  |
| Tingling or numbness in extremities  | 0.0729   | < 0.0001 | 0.0420  | 0.1037  |
| Heartburn                            | 0.0712   | < 0.0001 | 0.0404  | 0.1021  |
| Night sweats                         | 0.0681   | < 0.0001 | 0.0373  | 0.0988  |
| Urination at night                   | 0.0642   | < 0.0001 | 0.0337  | 0.0946  |
| Cough                                | 0.0631   | < 0.0001 | 0.0320  | 0.0941  |
| Mean daily steps in first 30 days    | -0.0620  | < 0.0001 | -0.0926 | -0.0313 |
| Tingling or pins and needles         | 0.0616   | 0.0001   | 0.0304  | 0.0928  |
| Diarrhea                             | 0.0609   | 0.0001   | 0.0298  | 0.0919  |
| C-reactive protein                   | 0.0604   | 0.0001   | 0.0296  | 0.0913  |
| Urgency                              | 0.0601   | 0.0001   | 0.0295  | 0.0906  |
| Blood glucose                        | 0.0594   | 0.0001   | 0.0288  | 0.0901  |
| Stiffness                            | 0.0591   | 0.0002   | 0.0284  | 0.0899  |
| Leg cramps                           | 0.0588   | 0.0002   | 0.0282  | 0.0893  |
| Mean leg balance time                | -0.0565  | 0.0003   | -0.0870 | -0.0260 |
| ALT                                  | 0.0560   | 0.0003   | 0.0254  | 0.0865  |
| Dryness                              | 0.0556   | 0.0004   | 0.0250  | 0.0863  |
| Heart rate                           | 0.0550   | 0.0006   | 0.0234  | 0.0866  |
| Itching skin                         | 0.0548   | 0.0005   | 0.0240  | 0.0856  |
| Excessive belching or passing of gas | 0.0547   | 0.0005   | 0.0240  | 0.0854  |

|    |                               |         |        |         |         |
|----|-------------------------------|---------|--------|---------|---------|
| 1  |                               |         |        |         |         |
| 2  |                               |         |        |         |         |
| 3  | Sit-rise score                | -0.0526 | 0.0008 | -0.0831 | -0.0220 |
| 4  | Sinus pain                    | 0.0525  | 0.0008 | 0.0219  | 0.0832  |
| 5  | 10-meter walk speed           | -0.0525 | 0.0008 | -0.0833 | -0.0217 |
| 6  | Oxygen saturation             | -0.0506 | 0.0012 | -0.0811 | -0.0201 |
| 7  | HbA1c                         | 0.0499  | 0.0014 | 0.0193  | 0.0805  |
| 8  | Respiratory rate              | 0.0495  | 0.0016 | 0.0187  | 0.0802  |
| 9  | Ejection fraction at rest     | 0.0465  | 0.0028 | 0.0160  | 0.0771  |
| 10 | WBC count                     | 0.0462  | 0.0045 | 0.0144  | 0.0781  |
| 11 | Absolute reticulocytes        | 0.0462  | 0.0033 | 0.0154  | 0.0770  |
| 12 | Reticulocytes (% RBC)         | 0.0461  | 0.0034 | 0.0153  | 0.0770  |
| 13 | Dry mouth                     | 0.0456  | 0.0038 | 0.0148  | 0.0765  |
| 14 | Albumin in urine              | -0.0456 | 0.0034 | -0.0761 | -0.0151 |
| 15 | Numbness or loss of sensation | 0.0441  | 0.0052 | 0.0132  | 0.0751  |
| 16 | Ear ringing                   | 0.0422  | 0.0068 | 0.0116  | 0.0727  |
| 17 | Food allergies                | 0.0418  | 0.0072 | 0.0113  | 0.0724  |
| 18 | MCH                           | -0.0413 | 0.0084 | -0.0720 | -0.0106 |
| 19 | Runny nose                    | 0.0389  | 0.0128 | 0.0083  | 0.0695  |
| 20 | Cramping                      | 0.0389  | 0.0147 | 0.0076  | 0.0701  |
| 21 | Hemorrhoids (symptom)         | 0.0386  | 0.0134 | 0.0080  | 0.0691  |
| 22 | Days watch worn 10+ hours in  |         |        |         |         |
| 23 | first 30 days                 | -0.0385 | 0.0149 | -0.0696 | -0.0075 |
| 24 | Handgrip                      | -0.0379 | 0.0150 | -0.0685 | -0.0074 |
| 25 | MCHC                          | -0.0378 | 0.0156 | -0.0684 | -0.0072 |
| 26 | Urine specific gravity        | 0.0361  | 0.0222 | 0.0052  | 0.0669  |
| 27 | Absolute basophils            | 0.0352  | 0.0255 | 0.0043  | 0.0660  |
| 28 | Urine reaction pH             | -0.0351 | 0.0243 | -0.0657 | -0.0046 |
| 29 | Monocytes                     | 0.0350  | 0.0253 | 0.0043  | 0.0657  |
| 30 | Lymphocytes (total)           | 0.0350  | 0.0283 | 0.0037  | 0.0663  |
| 31 | Triglycerides                 | 0.0347  | 0.0262 | 0.0041  | 0.0654  |
| 32 | Discharge                     | 0.0345  | 0.0273 | 0.0039  | 0.0652  |
| 33 | MCV                           | -0.0338 | 0.0306 | -0.0645 | -0.0032 |
| 34 | Neutrophils                   | 0.0331  | 0.0390 | 0.0017  | 0.0645  |
| 35 | Floaters                      | 0.0330  | 0.0342 | 0.0025  | 0.0636  |
| 36 | Creatinine (urine)            | 0.0325  | 0.0397 | 0.0015  | 0.0635  |
| 37 | AST                           | 0.0319  | 0.0404 | 0.0014  | 0.0625  |
| 38 | Serum creatinine              | 0.0311  | 0.0465 | 0.0005  | 0.0618  |
| 39 | Seasonal allergies            | 0.0288  | 0.0650 | -0.0018 | 0.0595  |
| 40 | Easy bruising or bleeding     | 0.0272  | 0.0821 | -0.0035 | 0.0578  |
| 41 | Vitamin D                     | -0.0269 | 0.0928 | -0.0583 | 0.0045  |
| 42 | Medication allergies          | 0.0258  | 0.0977 | -0.0047 | 0.0564  |
| 43 | Uric acid                     | 0.0247  | 0.1137 | -0.0059 | 0.0552  |
| 44 | Non-seasonal allergies        | 0.0237  | 0.1300 | -0.0070 | 0.0543  |
| 45 | HDL                           | -0.0229 | 0.1470 | -0.0540 | 0.0081  |
| 46 | Hemoglobin                    | -0.0229 | 0.1427 | -0.0535 | 0.0077  |
| 47 | Chloride                      | -0.0219 | 0.1590 | -0.0525 | 0.0086  |
| 48 | Protein (serum)               | -0.0213 | 0.1737 | -0.0520 | 0.0094  |
| 49 | Systolic blood pressure       | 0.0186  | 0.2348 | -0.0121 | 0.0492  |
| 50 | Hay fever                     | 0.0173  | 0.2677 | -0.0133 | 0.0478  |
| 51 | MPV                           | 0.0154  | 0.3227 | -0.0152 | 0.0460  |
| 52 | Absolute eosinophils          | 0.0147  | 0.3473 | -0.0160 | 0.0455  |
| 53 | Hematocrit                    | -0.0147 | 0.3474 | -0.0453 | 0.0159  |
| 54 | Basophils (% WBC)             | 0.0140  | 0.3691 | -0.0166 | 0.0446  |
| 55 |                               |         |        |         |         |
| 56 |                               |         |        |         |         |
| 57 |                               |         |        |         |         |
| 58 |                               |         |        |         |         |
| 59 |                               |         |        |         |         |
| 60 |                               |         |        |         |         |

1  
2  
3  
4  
5  
6  
7  
8  
9  
10  
11  
12  
13  
14  
15  
16  
17  
18  
19  
20  
21  
22  
23  
24  
25  
26  
27  
28  
29  
30  
31  
32  
33  
34  
35  
36  
37  
38  
39  
40  
41  
42  
43  
44  
45  
46  
47  
48  
49  
50  
51  
52  
53  
54  
55  
56  
57  
58  
59  
60

|                             |         |        |         |        |
|-----------------------------|---------|--------|---------|--------|
| Coronary calcium score      | -0.0118 | 0.4500 | -0.0426 | 0.0189 |
| RBC count                   | 0.0109  | 0.4830 | -0.0196 | 0.0415 |
| LDL                         | -0.0105 | 0.5007 | -0.0411 | 0.0201 |
| GFR MDRD                    | -0.0087 | 0.5884 | -0.0402 | 0.0228 |
| Diastolic blood pressure    | 0.0087  | 0.5775 | -0.0219 | 0.0393 |
| Neutrophil lymphocyte ratio | 0.0079  | 0.6135 | -0.0227 | 0.0384 |
| Sodium                      | -0.0077 | 0.6218 | -0.0383 | 0.0229 |
| Calcium                     | -0.0056 | 0.7179 | -0.0362 | 0.0249 |
| Cholesterol                 | -0.0054 | 0.7296 | -0.0360 | 0.0252 |
| Monocytes (% WBC)           | 0.0038  | 0.8106 | -0.0271 | 0.0346 |
| Neutrophil segments (% WBC) | -0.0035 | 0.8244 | -0.0340 | 0.0271 |
| Total neutrophils (% WBC)   | -0.0035 | 0.8244 | -0.0340 | 0.0271 |
| Platelets                   | 0.0031  | 0.8456 | -0.0280 | 0.0342 |
| Left ventricular mass index | -0.0026 | 0.8673 | -0.0333 | 0.0280 |
| TSH                         | 0.0025  | 0.8751 | -0.0281 | 0.0330 |
| Eosinophils (% WBC)         | 0.0023  | 0.8824 | -0.0283 | 0.0329 |
| Lymphocytes (% WBC)         | 0.0014  | 0.9280 | -0.0292 | 0.0320 |
| Potassium                   | -0.0008 | 0.9588 | -0.0314 | 0.0298 |
| Magnesium                   | -0.0005 | 0.9745 | -0.0316 | 0.0306 |

---

**eTable 6. LASSO Regression Results: Model 4**

| Variable                                   | Estimate | P-value  | CI 25%  | CI 75%  |
|--------------------------------------------|----------|----------|---------|---------|
| BMI                                        | 0.0664   | < 0.0001 | 0.0369  | 0.0960  |
| 6-minute walk                              | -0.0661  | < 0.0001 | -0.0955 | -0.0368 |
| Waist circumference                        | 0.0618   | < 0.0001 | 0.0326  | 0.0910  |
| Mean daily steps in first 30 days          | -0.0522  | 0.0004   | -0.0813 | -0.0232 |
| ALT                                        | 0.0520   | 0.0004   | 0.0230  | 0.0809  |
| Heart rate                                 | 0.0491   | 0.0012   | 0.0195  | 0.0787  |
| 30 second chair stand                      | -0.0458  | 0.0023   | -0.0752 | -0.0164 |
| Blood glucose                              | 0.0454   | 0.0022   | 0.0164  | 0.0745  |
| WBC count                                  | 0.0454   | 0.0028   | 0.0157  | 0.0751  |
| C-reactive protein                         | 0.0431   | 0.0040   | 0.0137  | 0.0724  |
| Absolute reticulocytes                     | 0.0413   | 0.0054   | 0.0122  | 0.0705  |
| Sit-rise score                             | -0.0408  | 0.0058   | -0.0697 | -0.0118 |
| Reticulocytes (% RBC)                      | 0.0401   | 0.0071   | 0.0109  | 0.0692  |
| Handgrip                                   | -0.0399  | 0.0070   | -0.0688 | -0.0109 |
| Mean leg balance time                      | -0.0390  | 0.0083   | -0.0679 | -0.0100 |
| Oxygen saturation                          | -0.0385  | 0.0091   | -0.0675 | -0.0096 |
| AST                                        | 0.0374   | 0.0112   | 0.0085  | 0.0663  |
| Respiratory rate                           | 0.0367   | 0.0138   | 0.0075  | 0.0659  |
| 10-meter walk speed                        | -0.0362  | 0.0154   | -0.0654 | -0.0069 |
| Albumin in urine                           | -0.0361  | 0.0146   | -0.0651 | -0.0071 |
| Days watch worn 10+ hours in first 30 days | -0.0360  | 0.0157   | -0.0653 | -0.0068 |
| Lymphocytes (total)                        | 0.0354   | 0.0181   | 0.0060  | 0.0648  |
| HbA1c                                      | 0.0352   | 0.0177   | 0.0061  | 0.0643  |
| Ejection fraction at rest                  | 0.0351   | 0.0173   | 0.0062  | 0.0641  |
| Neutrophils                                | 0.0350   | 0.0200   | 0.0055  | 0.0644  |
| MCHC                                       | -0.0341  | 0.0212   | -0.0631 | -0.0051 |
| MCH                                        | -0.0301  | 0.0428   | -0.0592 | -0.0010 |
| Monocytes                                  | 0.0282   | 0.0577   | -0.0009 | 0.0572  |
| Absolute basophils                         | 0.0270   | 0.0702   | -0.0022 | 0.0562  |
| Triglycerides                              | 0.0267   | 0.0716   | -0.0023 | 0.0557  |
| Urine reaction pH                          | -0.0265  | 0.0734   | -0.0554 | 0.0025  |
| MCV                                        | -0.0223  | 0.1333   | -0.0513 | 0.0068  |
| Sodium                                     | -0.0220  | 0.1359   | -0.0510 | 0.0069  |
| Chloride                                   | -0.0211  | 0.1537   | -0.0500 | 0.0079  |
| Serum creatinine                           | 0.0203   | 0.1701   | -0.0087 | 0.0492  |
| MPV                                        | 0.0189   | 0.2015   | -0.0101 | 0.0478  |
| Potassium                                  | -0.0185  | 0.2097   | -0.0475 | 0.0104  |
| Urine specific gravity                     | 0.0179   | 0.2308   | -0.0114 | 0.0473  |
| Vitamin D                                  | -0.0166  | 0.2713   | -0.0462 | 0.0130  |
| Systolic blood pressure                    | 0.0165   | 0.2654   | -0.0125 | 0.0455  |
| LDL                                        | -0.0158  | 0.2837   | -0.0448 | 0.0131  |
| Protein (serum)                            | -0.0145  | 0.3256   | -0.0435 | 0.0145  |
| RBC count                                  | 0.0144   | 0.3285   | -0.0145 | 0.0434  |

1  
2  
3  
4  
5  
6  
7  
8  
9  
10  
11  
12  
13  
14  
15  
16  
17  
18  
19  
20  
21  
22  
23  
24  
25  
26  
27  
28  
29  
30  
31  
32  
33  
34  
35  
36  
37  
38  
39  
40  
41  
42  
43  
44  
45  
46  
47  
48  
49  
50  
51  
52  
53  
54  
55  
56  
57  
58  
59  
60

|                             |         |        |         |        |
|-----------------------------|---------|--------|---------|--------|
| Creatinine (urine)          | 0.0140  | 0.3518 | -0.0154 | 0.0434 |
| Basophils (% WBC)           | 0.0119  | 0.4208 | -0.0171 | 0.0408 |
| Left ventricular mass index | -0.0114 | 0.4391 | -0.0404 | 0.0175 |
| Uric acid                   | 0.0111  | 0.4506 | -0.0178 | 0.0401 |
| Coronary calcium score      | -0.0108 | 0.4681 | -0.0398 | 0.0183 |
| TSH                         | 0.0102  | 0.4912 | -0.0188 | 0.0391 |
| Hemoglobin                  | -0.0095 | 0.5236 | -0.0385 | 0.0196 |
| Magnesium                   | -0.0074 | 0.6195 | -0.0366 | 0.0218 |
| Diastolic blood pressure    | 0.0064  | 0.6651 | -0.0226 | 0.0354 |
| Eosinophils (% WBC)         | -0.0057 | 0.7011 | -0.0346 | 0.0233 |
| GFR MDRD                    | -0.0054 | 0.7173 | -0.0349 | 0.0241 |
| Neutrophil lymphocyte ratio | 0.0053  | 0.7185 | -0.0236 | 0.0343 |
| Calcium                     | -0.0049 | 0.7398 | -0.0339 | 0.0240 |
| Platelets                   | 0.0039  | 0.7947 | -0.0254 | 0.0331 |
| Cholesterol                 | -0.0034 | 0.8172 | -0.0324 | 0.0256 |
| HDL                         | -0.0027 | 0.8565 | -0.0322 | 0.0267 |
| Monocytes (% WBC)           | 0.0025  | 0.8652 | -0.0266 | 0.0317 |
| Absolute eosinophils        | 0.0017  | 0.9082 | -0.0274 | 0.0309 |
| Lymphocytes (% WBC)         | 0.0015  | 0.9192 | -0.0275 | 0.0305 |
| Neutrophil segments (% WBC) | -0.0013 | 0.9307 | -0.0302 | 0.0277 |
| Total neutrophils (% WBC)   | -0.0013 | 0.9307 | -0.0302 | 0.0277 |
| Hematocrit                  | -0.0011 | 0.9413 | -0.0301 | 0.0279 |

**eTable 7. LASSO Regression Results: Model 5**

| Variable                       | Estimate | P-value | CI 25%  | CI 75% |
|--------------------------------|----------|---------|---------|--------|
| AST                            | 0.0382   | 0.0087  | 0.0096  | 0.0667 |
| ALT                            | 0.0352   | 0.0162  | 0.0065  | 0.0638 |
| HDL                            | 0.0312   | 0.0383  | 0.0017  | 0.0607 |
| Serum creatinine               | 0.0220   | 0.1313  | -0.0066 | 0.0506 |
| LDL                            | -0.0212  | 0.1460  | -0.0497 | 0.0074 |
| Blood glucose                  | 0.0207   | 0.1606  | -0.0082 | 0.0497 |
| MCHC                           | -0.0199  | 0.1747  | -0.0486 | 0.0088 |
| Basophils (% WBC)              | 0.0183   | 0.2085  | -0.0102 | 0.0469 |
| Chloride                       | -0.0183  | 0.2099  | -0.0468 | 0.0103 |
| MPV                            | 0.0181   | 0.2145  | -0.0105 | 0.0467 |
| Sodium                         | -0.0179  | 0.2203  | -0.0464 | 0.0107 |
| Absolute basophils             | 0.0170   | 0.2479  | -0.0119 | 0.0460 |
| Protein (serum)                | -0.0169  | 0.2471  | -0.0455 | 0.0117 |
| MCH                            | -0.0148  | 0.3137  | -0.0437 | 0.0140 |
| Potassium                      | -0.0143  | 0.3259  | -0.0429 | 0.0143 |
| GFR MDRD                       | -0.0138  | 0.3535  | -0.0430 | 0.0154 |
| Lymphocytes (total)            | 0.0133   | 0.3748  | -0.0160 | 0.0425 |
| Platelets                      | -0.0127  | 0.3923  | -0.0417 | 0.0164 |
| WBC count                      | 0.0125   | 0.4143  | -0.0175 | 0.0424 |
| Monocytes                      | 0.0121   | 0.4122  | -0.0168 | 0.0409 |
| C-reactive protein             | 0.0104   | 0.4880  | -0.0190 | 0.0398 |
| Monocytes (% WBC)              | 0.0103   | 0.4818  | -0.0185 | 0.0391 |
| HbA1c                          | 0.0101   | 0.4930  | -0.0188 | 0.0391 |
| MCV                            | -0.0101  | 0.4933  | -0.0388 | 0.0187 |
| TSH                            | 0.0100   | 0.4930  | -0.0186 | 0.0386 |
| Albumin in urine               | -0.0096  | 0.5130  | -0.0383 | 0.0192 |
| Magnesium                      | 0.0095   | 0.5205  | -0.0195 | 0.0385 |
| Uric acid                      | -0.0080  | 0.5827  | -0.0366 | 0.0206 |
| RBC count                      | 0.0073   | 0.6161  | -0.0213 | 0.0359 |
| Urine reaction pH              | -0.0073  | 0.6185  | -0.0360 | 0.0214 |
| Neutrophil segments<br>(% WBC) | -0.0072  | 0.6205  | -0.0358 | 0.0214 |
| Total neutrophils (%<br>WBC)   | -0.0072  | 0.6205  | -0.0358 | 0.0214 |
| Absolute reticulocytes         | 0.0069   | 0.6408  | -0.0222 | 0.0361 |
| Neutrophils                    | 0.0068   | 0.6483  | -0.0226 | 0.0363 |
| Absolute eosinophils           | -0.0064  | 0.6635  | -0.0352 | 0.0224 |
| Calcium                        | 0.0062   | 0.6691  | -0.0224 | 0.0348 |
| Vitamin D                      | 0.0057   | 0.7024  | -0.0237 | 0.0352 |
| Lymphocytes (% WBC)            | 0.0057   | 0.6944  | -0.0229 | 0.0343 |
| Reticulocytes (% RBC)          | 0.0057   | 0.7017  | -0.0235 | 0.0349 |
| Triglycerides                  | 0.0055   | 0.7075  | -0.0233 | 0.0343 |
| Eosinophils (% WBC)            | -0.0047  | 0.7449  | -0.0333 | 0.0238 |
| Hemoglobin                     | -0.0047  | 0.7481  | -0.0334 | 0.0240 |



|    |                        |         |        |         |        |
|----|------------------------|---------|--------|---------|--------|
| 1  |                        |         |        |         |        |
| 2  |                        |         |        |         |        |
| 3  | Cholesterol            | -0.0033 | 0.8231 | -0.0319 | 0.0254 |
| 4  | Urine specific gravity | -0.0029 | 0.8465 | -0.0321 | 0.0263 |
| 5  | Neutrophil lymphocyte  |         |        |         |        |
| 6  | ratio                  | -0.0009 | 0.9488 | -0.0295 | 0.0276 |
| 7  | Creatinine (urine)     | 0.0006  | 0.9663 | -0.0285 | 0.0298 |
| 8  | Hematocrit             | 0.0000  | 0.9974 | -0.0286 | 0.0287 |
| 9  |                        |         |        |         |        |
| 10 |                        |         |        |         |        |
| 11 |                        |         |        |         |        |
| 12 |                        |         |        |         |        |
| 13 |                        |         |        |         |        |
| 14 |                        |         |        |         |        |
| 15 |                        |         |        |         |        |
| 16 |                        |         |        |         |        |
| 17 |                        |         |        |         |        |
| 18 |                        |         |        |         |        |
| 19 |                        |         |        |         |        |
| 20 |                        |         |        |         |        |
| 21 |                        |         |        |         |        |
| 22 |                        |         |        |         |        |
| 23 |                        |         |        |         |        |
| 24 |                        |         |        |         |        |
| 25 |                        |         |        |         |        |
| 26 |                        |         |        |         |        |
| 27 |                        |         |        |         |        |
| 28 |                        |         |        |         |        |
| 29 |                        |         |        |         |        |
| 30 |                        |         |        |         |        |
| 31 |                        |         |        |         |        |
| 32 |                        |         |        |         |        |
| 33 |                        |         |        |         |        |
| 34 |                        |         |        |         |        |
| 35 |                        |         |        |         |        |
| 36 |                        |         |        |         |        |
| 37 |                        |         |        |         |        |
| 38 |                        |         |        |         |        |
| 39 |                        |         |        |         |        |
| 40 |                        |         |        |         |        |
| 41 |                        |         |        |         |        |
| 42 |                        |         |        |         |        |
| 43 |                        |         |        |         |        |
| 44 |                        |         |        |         |        |
| 45 |                        |         |        |         |        |
| 46 |                        |         |        |         |        |
| 47 |                        |         |        |         |        |
| 48 |                        |         |        |         |        |
| 49 |                        |         |        |         |        |
| 50 |                        |         |        |         |        |
| 51 |                        |         |        |         |        |
| 52 |                        |         |        |         |        |
| 53 |                        |         |        |         |        |
| 54 |                        |         |        |         |        |
| 55 |                        |         |        |         |        |
| 56 |                        |         |        |         |        |
| 57 |                        |         |        |         |        |
| 58 |                        |         |        |         |        |
| 59 |                        |         |        |         |        |
| 60 |                        |         |        |         |        |

**eFigure 1A. Distribution of PHQ-9 Across Risk Groups by Asthma**

Distribution of PHQ-9 across Risk Group by Asthma

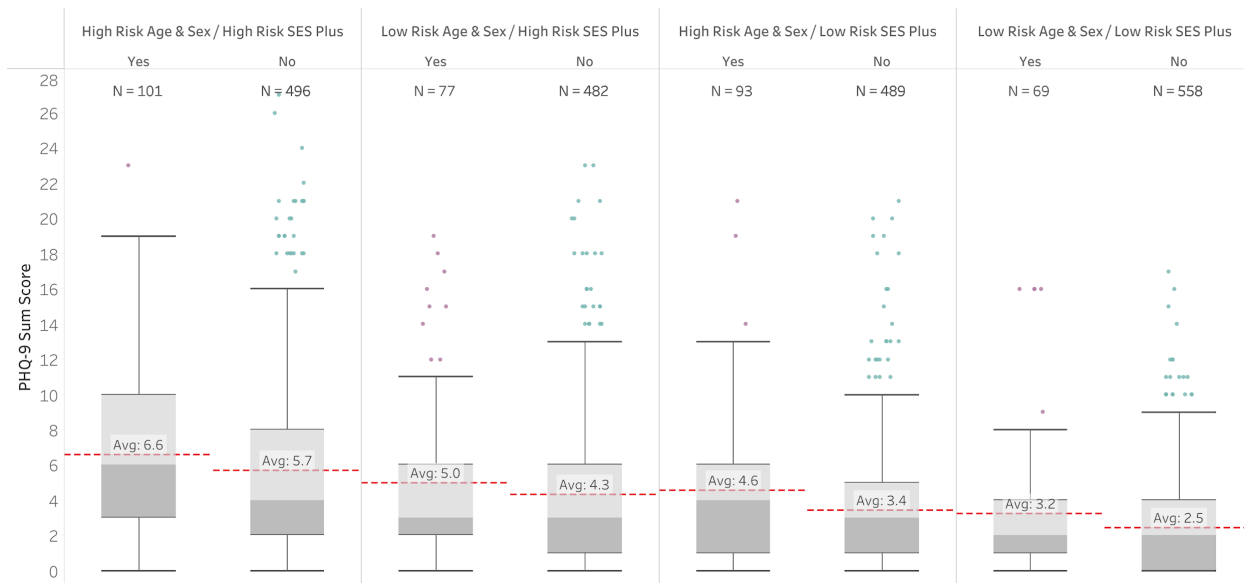

Peer review only

### eFigure 1B. Distribution of PHQ-9 Across Risk Groups by Backache

Distribution of PHQ-9 across Risk Group by Backache

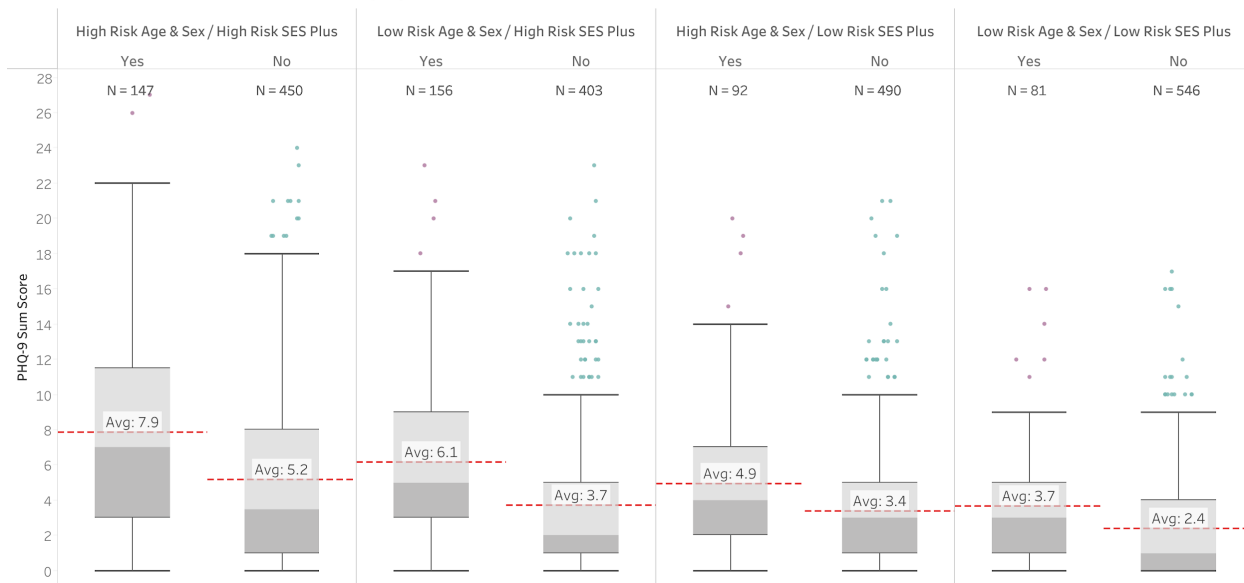

Peer review only

**eFigure 1C. Distribution of PHQ-9 Across Risk Groups by Memory Change**

Distribution of PHQ-9 across Risk Group by Memory Change

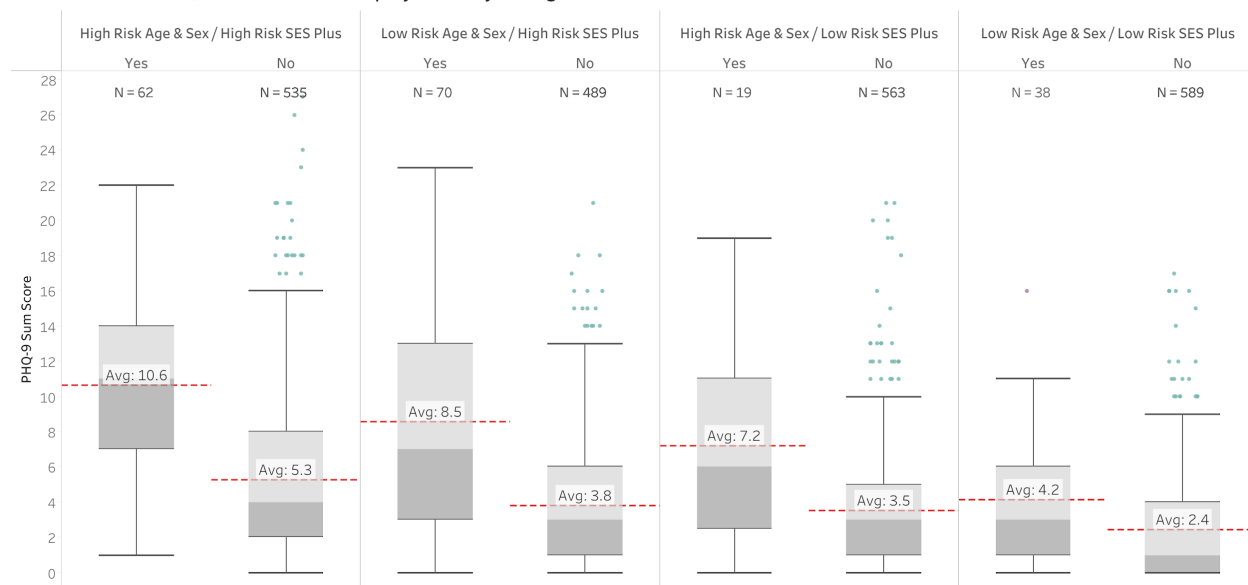

Peer review only

### eFigure 1D. Distribution of PHQ-9 Across Risk Groups by Body Image Concerns

Distribution of PHQ-9 across Risk Group by Body Image Concerns

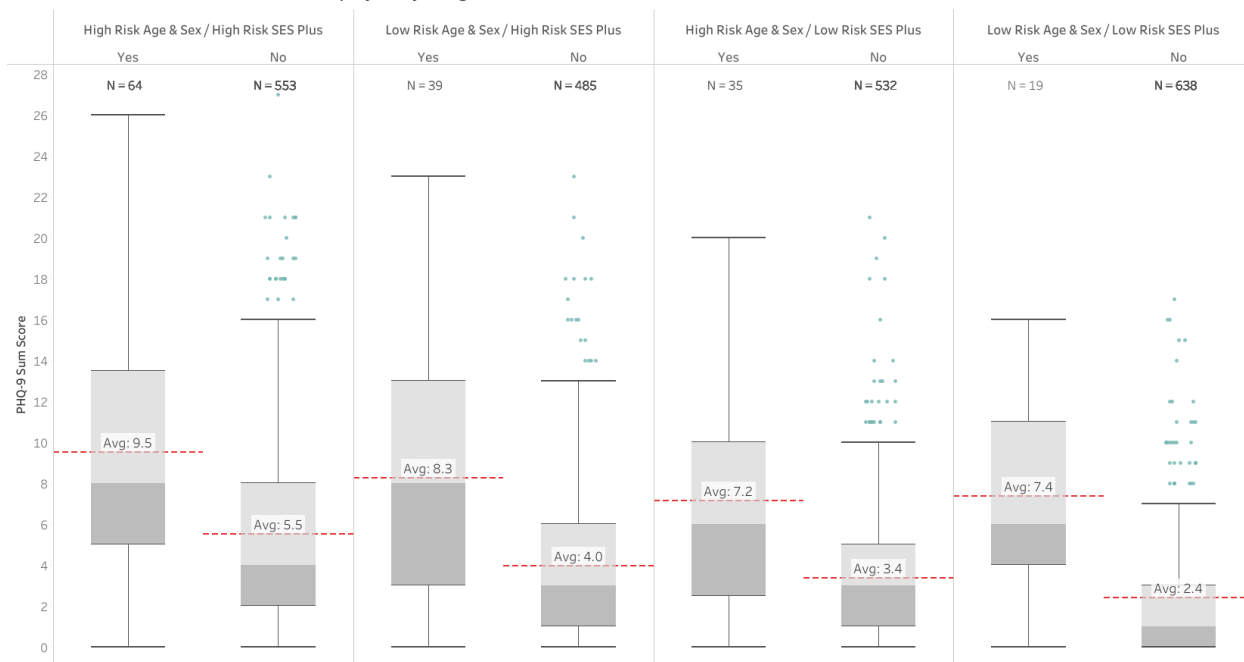

**eFigure 1E. Distribution of PHQ-9 Across Risk Groups by Sleep Apnea**

Distribution of PHQ-9 across Risk Group by Sleep Apnea

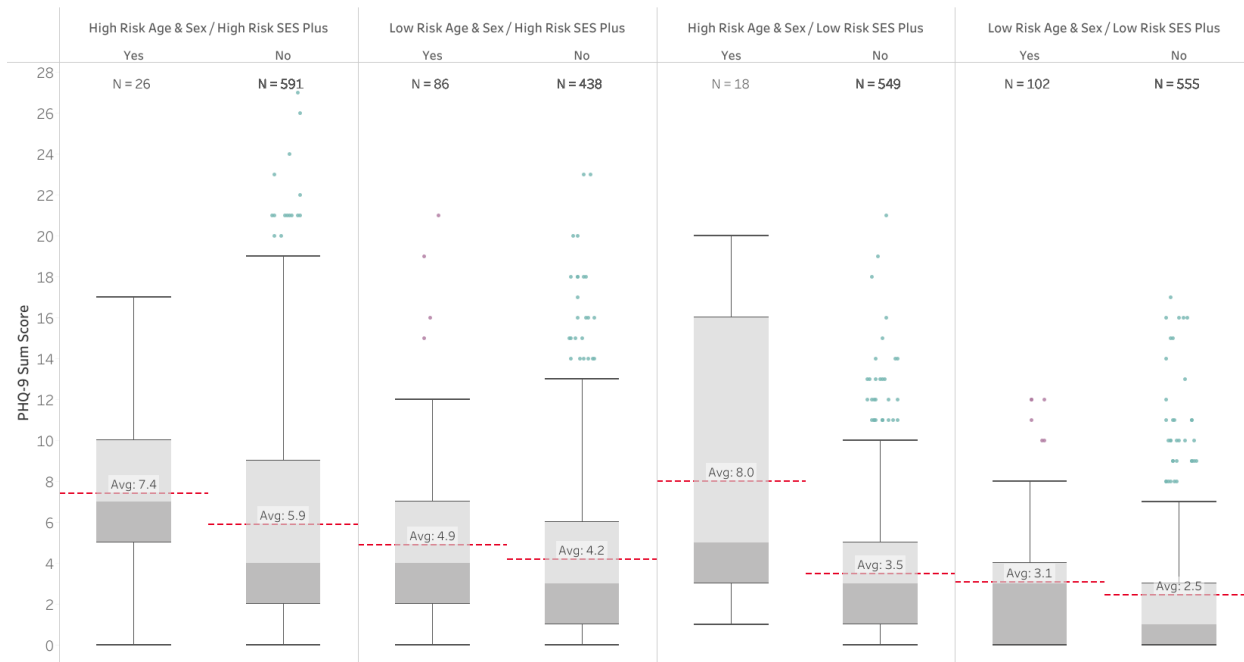

For peer review only

## STROBE Statement—checklist of items that should be included in reports of observational studies

|                              | Item No | Recommendation                                                                                                                                                                                                                                                                                                                                                                                                                                                         | Page No |
|------------------------------|---------|------------------------------------------------------------------------------------------------------------------------------------------------------------------------------------------------------------------------------------------------------------------------------------------------------------------------------------------------------------------------------------------------------------------------------------------------------------------------|---------|
| <b>Title and abstract</b>    | 1       | (a) Indicate the study's design with a commonly used term in the title or the abstract                                                                                                                                                                                                                                                                                                                                                                                 | 2,3     |
|                              |         | (b) Provide in the abstract an informative and balanced summary of what was done and what was found                                                                                                                                                                                                                                                                                                                                                                    | 2,3     |
| <b>Introduction</b>          |         |                                                                                                                                                                                                                                                                                                                                                                                                                                                                        |         |
| Background/rationale         | 2       | Explain the scientific background and rationale for the investigation being reported                                                                                                                                                                                                                                                                                                                                                                                   | 5       |
| Objectives                   | 3       | State specific objectives, including any prespecified hypotheses                                                                                                                                                                                                                                                                                                                                                                                                       | 5       |
| <b>Methods</b>               |         |                                                                                                                                                                                                                                                                                                                                                                                                                                                                        |         |
| Study design                 | 4       | Present key elements of study design early in the paper                                                                                                                                                                                                                                                                                                                                                                                                                | 6       |
| Setting                      | 5       | Describe the setting, locations, and relevant dates, including periods of recruitment, exposure, follow-up, and data collection                                                                                                                                                                                                                                                                                                                                        | 6,9     |
| Participants                 | 6       | (a) <i>Cohort study</i> —Give the eligibility criteria, and the sources and methods of selection of participants. Describe methods of follow-up<br><i>Case-control study</i> —Give the eligibility criteria, and the sources and methods of case ascertainment and control selection. Give the rationale for the choice of cases and controls<br><i>Cross-sectional study</i> —Give the eligibility criteria, and the sources and methods of selection of participants | 6       |
|                              |         | (b) <i>Cohort study</i> —For matched studies, give matching criteria and number of exposed and unexposed<br><i>Case-control study</i> —For matched studies, give matching criteria and the number of controls per case                                                                                                                                                                                                                                                 | 6       |
| Variables                    | 7       | Clearly define all outcomes, exposures, predictors, potential confounders, and effect modifiers. Give diagnostic criteria, if applicable                                                                                                                                                                                                                                                                                                                               | 6       |
| Data sources/<br>measurement | 8*      | For each variable of interest, give sources of data and details of methods of assessment (measurement). Describe comparability of assessment methods if there is more than one group                                                                                                                                                                                                                                                                                   | 6       |
| Bias                         | 9       | Describe any efforts to address potential sources of bias                                                                                                                                                                                                                                                                                                                                                                                                              | 6       |
| Study size                   | 10      | Explain how the study size was arrived at                                                                                                                                                                                                                                                                                                                                                                                                                              | 6       |
| Quantitative variables       | 11      | Explain how quantitative variables were handled in the analyses. If applicable, describe which groupings were chosen and why                                                                                                                                                                                                                                                                                                                                           | 6       |
| Statistical methods          | 12      | (a) Describe all statistical methods, including those used to control for confounding                                                                                                                                                                                                                                                                                                                                                                                  | 7-9     |
|                              |         | (b) Describe any methods used to examine subgroups and interactions                                                                                                                                                                                                                                                                                                                                                                                                    | 7-9     |
|                              |         | (c) Explain how missing data were addressed                                                                                                                                                                                                                                                                                                                                                                                                                            | 7-9     |
|                              |         | (d) <i>Cohort study</i> —If applicable, explain how loss to follow-up was addressed<br><i>Case-control study</i> —If applicable, explain how matching of cases and controls was addressed<br><i>Cross-sectional study</i> —If applicable, describe analytical methods taking account of sampling strategy                                                                                                                                                              | 7-9     |
|                              |         | (e) Describe any sensitivity analyses                                                                                                                                                                                                                                                                                                                                                                                                                                  | n/a     |

Continued on next page

| <b>Results</b>           |     |                                                                                                                                                                                                              |       |
|--------------------------|-----|--------------------------------------------------------------------------------------------------------------------------------------------------------------------------------------------------------------|-------|
| Participants             | 13* | (a) Report numbers of individuals at each stage of study—eg numbers potentially eligible, examined for eligibility, confirmed eligible, included in the study, completing follow-up, and analysed            | 9,10  |
|                          |     | (b) Give reasons for non-participation at each stage                                                                                                                                                         | 9,10  |
|                          |     | (c) Consider use of a flow diagram                                                                                                                                                                           | n/a   |
| Descriptive data         | 14* | (a) Give characteristics of study participants (eg demographic, clinical, social) and information on exposures and potential confounders                                                                     | 9,10  |
|                          |     | (b) Indicate number of participants with missing data for each variable of interest                                                                                                                          | 9,10  |
|                          |     | (c) <i>Cohort study</i> —Summarise follow-up time (eg, average and total amount)                                                                                                                             | 9,10  |
| Outcome data             | 15* | <i>Cohort study</i> —Report numbers of outcome events or summary measures over time                                                                                                                          | 9,10  |
|                          |     | <i>Case-control study</i> —Report numbers in each exposure category, or summary measures of exposure                                                                                                         | n/a   |
|                          |     | <i>Cross-sectional study</i> —Report numbers of outcome events or summary measures                                                                                                                           | n/a   |
| Main results             | 16  | (a) Give unadjusted estimates and, if applicable, confounder-adjusted estimates and their precision (eg, 95% confidence interval). Make clear which confounders were adjusted for and why they were included | 9,10  |
|                          |     | (b) Report category boundaries when continuous variables were categorized                                                                                                                                    | 9,10  |
|                          |     | (c) If relevant, consider translating estimates of relative risk into absolute risk for a meaningful time period                                                                                             | 9,10  |
| Other analyses           | 17  | Report other analyses done—eg analyses of subgroups and interactions, and sensitivity analyses                                                                                                               | n/a   |
| <b>Discussion</b>        |     |                                                                                                                                                                                                              |       |
| Key results              | 18  | Summarise key results with reference to study objectives                                                                                                                                                     | 11-13 |
| Limitations              | 19  | Discuss limitations of the study, taking into account sources of potential bias or imprecision. Discuss both direction and magnitude of any potential bias                                                   | 13    |
| Interpretation           | 20  | Give a cautious overall interpretation of results considering objectives, limitations, multiplicity of analyses, results from similar studies, and other relevant evidence                                   | 13,14 |
| Generalisability         | 21  | Discuss the generalisability (external validity) of the study results                                                                                                                                        | 13,14 |
| <b>Other information</b> |     |                                                                                                                                                                                                              |       |
| Funding                  | 22  | Give the source of funding and the role of the funders for the present study and, if applicable, for the original study on which the present article is based                                                | 17    |

\*Give information separately for cases and controls in case-control studies and, if applicable, for exposed and unexposed groups in cohort and cross-sectional studies.

**Note:** An Explanation and Elaboration article discusses each checklist item and gives methodological background and published examples of transparent reporting. The STROBE checklist is best used in conjunction with this article (freely available on the Web sites of PLoS Medicine at <http://www.plosmedicine.org/>, Annals of Internal Medicine at <http://www.annals.org/>, and Epidemiology at <http://www.epidem.com/>). Information on the STROBE Initiative is available at [www.strobe-statement.org](http://www.strobe-statement.org).



# BMJ Open

## Biological and Clinical Correlates of the Patient Health Questionnaire-9: Exploratory Cross-Sectional Analyses of the Baseline Health Study

|                                 |                                                                                                                                                                                                                                                                                                                                                                                                       |
|---------------------------------|-------------------------------------------------------------------------------------------------------------------------------------------------------------------------------------------------------------------------------------------------------------------------------------------------------------------------------------------------------------------------------------------------------|
| Journal:                        | <i>BMJ Open</i>                                                                                                                                                                                                                                                                                                                                                                                       |
| Manuscript ID                   | bmjopen-2021-054741.R1                                                                                                                                                                                                                                                                                                                                                                                |
| Article Type:                   | Original research                                                                                                                                                                                                                                                                                                                                                                                     |
| Date Submitted by the Author:   | 26-Oct-2021                                                                                                                                                                                                                                                                                                                                                                                           |
| Complete List of Authors:       | Califf, Robert; Verily Life Sciences LLC<br>Wong, Celeste; Verily Life Sciences LLC<br>Doraiswamy, Murali; Duke University Medical Center, Psychiatry; Duke University Medical Center, Brain Sciences<br>Hong, David ; Stanford University School of Medicine, Department of Psychiatry and Behavioral Sciences<br>Miller, David; Verily Life Sciences LLC<br>Mega, Jessica; Verily Life Sciences LLC |
| <b>Primary Subject Heading</b>: | Mental health                                                                                                                                                                                                                                                                                                                                                                                         |
| Secondary Subject Heading:      | Public health                                                                                                                                                                                                                                                                                                                                                                                         |
| Keywords:                       | MENTAL HEALTH, PUBLIC HEALTH, Depression & mood disorders < PSYCHIATRY, Anxiety disorders < PSYCHIATRY                                                                                                                                                                                                                                                                                                |
|                                 |                                                                                                                                                                                                                                                                                                                                                                                                       |

SCHOLARONE™  
Manuscripts



I, the Submitting Author has the right to grant and does grant on behalf of all authors of the Work (as defined in the below author licence), an exclusive licence and/or a non-exclusive licence for contributions from authors who are: i) UK Crown employees; ii) where BMJ has agreed a CC-BY licence shall apply, and/or iii) in accordance with the terms applicable for US Federal Government officers or employees acting as part of their official duties; on a worldwide, perpetual, irrevocable, royalty-free basis to BMJ Publishing Group Ltd ("BMJ") its licensees and where the relevant Journal is co-owned by BMJ to the co-owners of the Journal, to publish the Work in this journal and any other BMJ products and to exploit all rights, as set out in our [licence](#).

The Submitting Author accepts and understands that any supply made under these terms is made by BMJ to the Submitting Author unless you are acting as an employee on behalf of your employer or a postgraduate student of an affiliated institution which is paying any applicable article publishing charge ("APC") for Open Access articles. Where the Submitting Author wishes to make the Work available on an Open Access basis (and intends to pay the relevant APC), the terms of reuse of such Open Access shall be governed by a Creative Commons licence – details of these licences and which [Creative Commons](#) licence will apply to this Work are set out in our licence referred to above.

Other than as permitted in any relevant BMJ Author's Self Archiving Policies, I confirm this Work has not been accepted for publication elsewhere, is not being considered for publication elsewhere and does not duplicate material already published. I confirm all authors consent to publication of this Work and authorise the granting of this licence.

**ORIGINAL RESEARCH****Biological and Clinical Correlates of the Patient Health Questionnaire-9: Exploratory Cross-Sectional Analyses of the Baseline Health Study****Running title:** Biological and Clinical Correlates of PHQ-9Robert M. Califf, MD<sup>1</sup>; Celeste Wong, MPH<sup>1</sup>; P. Murali Doraiswamy, MBBS<sup>2</sup>;David S. Hong, MD<sup>3</sup>; David P. Miller, MS<sup>1</sup>; Jessica L. Mega, MD, MPH<sup>1</sup>; for the Baseline Study Group<sup>1</sup>Verily Life Sciences, San Francisco, CA; <sup>2</sup>Department of Psychiatry and Behavioral Sciences and the Duke Institute for Brain Sciences, Duke University School of Medicine, Durham, NC;<sup>3</sup>Department of Psychiatry and Behavioral Sciences, Stanford University School of Medicine, Stanford, CA.**Address for correspondence:** Robert M. Califf, MD; Verily Life Sciences, 269 E Grand Ave., South San Francisco, CA 94080; Email: [robert.califf@duke.edu](mailto:robert.califf@duke.edu)**Number of references:** 41**Number of tables:** 3**Number of figures:** 5**Number of appendices:** 1 (12 eTables, 1 eFigure w/5 parts)**Text word count:** 2827**Abstract word count:** 300

1  
2  
3  
4  
5  
6  
7  
8  
9  
10  
11  
12  
13  
14  
15  
16  
17  
18  
19  
20  
21  
22  
23  
24  
25  
26  
27  
28  
29  
30  
31  
32  
33  
34  
35  
36  
37  
38  
39  
40  
41  
42  
43  
44  
45  
46  
47  
48  
49  
50  
51  
52  
53  
54  
55  
56  
57  
58  
59  
60

**Key words:** Patient Health Questionnaire-9; measures of health and disease; effective clinical intervention

For peer review only

## ABSTRACT

**Objectives:** We assessed the relationship between the Patient Health Questionnaire-9 (PHQ-9) at intake and other measurements intended to assess biological factors, markers of disease, and health status.

**Design, setting, and participants:** We performed a cross-sectional analysis of 2365 participants from the Baseline Health Study (BHS), a prospective cohort of adults selected to represent major demographic groups in the United States. Participants underwent deep phenotyping on demographic, clinical, laboratory, functional, and imaging findings.

**Importance:** Despite extensive research on the clinical implications of the PHQ-9, data are limited on the relationship between PHQ-9 scores and other measures of health and disease; we sought to better understand this relationship.

**Interventions:** None.

**Main outcomes and measures:** Cross-sectional measures of medical illnesses, gait, balance strength, activities of daily living, imaging, and laboratory tests.

**Results:** Compared with lower PHQ-9 scores, higher scores were associated with female sex (46.9 to 66.7%), younger participants (53.6 to 42.4 years), and compromised physical status (higher resting heart rates [65 vs. 75 bpm], larger body mass index [26.5 to 30 kg/m<sup>2</sup>], greater waist circumference [91 to 96.5 cm]) and chronic conditions, including gastroesophageal reflux disease (13.2 to 24.7%) and asthma (9.5 to 20.4%) ( $p < 0.0001$ ). Increasing PHQ-9 score was associated with a higher frequency of comorbidities (migraines [6 to 20.4%]) and active symptoms (leg cramps [6.4 to 24.7%], mood change [1.2 to 47.3%], lack of energy [1.2 to 57%]) ( $p < 0.0001$ ). After adjustment for relevant demographic, socioeconomic, behavioral, and medical characteristics, we found that memory change, tension, shortness of breath, and indicators of

1  
2  
3  
4 musculoskeletal symptoms (backache and neck pain) are related to higher PHQ-9 scores  
5  
6 (p<0.0001).  
7

8 **Conclusions:** Our study highlights how: 1) even subthreshold depressive symptoms (measured  
9  
10 by PHQ-9) may be indicative of several individual- and population-level concerns that demand  
11  
12 more attention; and 2) depression should be considered a comorbidity in common disease.  
13  
14

15 **Clinical trial registration:** <https://clinicaltrials.gov/ct2/show/NCT03154346>  
16  
17  
18  
19  
20  
21  
22  
23  
24  
25  
26  
27  
28  
29  
30  
31  
32  
33  
34  
35  
36  
37  
38  
39  
40  
41  
42  
43  
44  
45  
46  
47  
48  
49  
50  
51  
52  
53  
54  
55  
56  
57  
58  
59  
60

## ARTICLE SUMMARY

### Strengths and limitations of this study

- This study included deep phenotyping on demographic, clinical, laboratory, functional, and imaging findings of 2365 participants from the Baseline Health Study (BHS).
- This study provides important data on the relationship between PHQ-9 scores and other measures of health and disease.
- The cross-sectional nature of this study limits our ability to assess the time course of these findings; however, follow-up is currently accruing.
- People with significant depression are less likely to volunteer, thereby limiting the breadth of depression observed in this study.
- The study population is generally representative of adult age, sex, race, and ethnicity, but it is not a fully representative sample of the population.

## INTRODUCTION

Depression is a complex, chronic condition that affects hundreds of millions of people worldwide.<sup>1</sup> Bidirectional relationships have been reported between depression and many chronic illnesses<sup>2</sup>; however, most studies have focused on specific conditions, such as diabetes, stroke, or congestive heart failure, as opposed to a multidimensional deep phenotyping approach. Findings from previous studies highlight the need to more fully characterize the relationship between depression and physical health.<sup>3-5</sup> Furthermore, it would be helpful to better understand whether these relationships exist only above a certain threshold or across the entire continuum.

The most common screening tool for depression is the Patient Health Questionnaire-9 (PHQ-9), whose operating characteristics are well known<sup>6</sup> and have been validated in a variety of contexts.<sup>7,8</sup> Despite extensive research on the clinical and behavioral implications of PHQ-9,<sup>9,10</sup> the results of this questionnaire are often used in a dichotomous manner (e.g., cut-off of 10) without evaluating the full relationship between PHQ-9 scores and measures of health and disease.

The Baseline Health Study (BHS)<sup>11</sup> is a prospective cohort study of an adult population selected to represent major demographic groups in the U.S. In BHS, deep phenotyping of numerous demographic, clinical, laboratory, functional, and imaging findings is coupled with ongoing longitudinal follow-up. The purpose of our study was to assess the relationship between the entire spectrum of depression, measured by PHQ-9, and a broad array of measurements intended to assess health status.

## METHODS

### The Baseline Health Study



1  
2  
3  
4 BHS methods have been previously described,<sup>11-13</sup> including entry and exclusion criteria, the  
5  
6 institutional review board and participant consent procedures, the data collection scheme, and  
7  
8 key components of study procedures. Briefly, BHS (ClinicalTrials.gov Identifier:  
9  
10 NCT03154346) was approved by the Western Institutional Review Board, Inc. (Puyallup, WA;  
11  
12 protocol number is 2017-BL-001). All research participants gave written, informed consent prior  
13  
14 to participation.  
15

16  
17 Additional details of the effects of social determinants on health in the BHS study have  
18  
19 been previously reported.<sup>12</sup> BHS is enrolling a large number of participants, beginning with  
20  
21 intensive measurement of the first 2502 people (the deeply phenotyped cohort) in whom a large  
22  
23 volume of multimodal data are collected. Four clinical BHS sites in the U.S. have begun  
24  
25 enrollment.  
26  
27

28  
29 The participants were enrolled through a virtual online registry with selection of  
30  
31 participants for the deep phenotyping cohort included in this report using an algorithm intended  
32  
33 to produce a representative sample of U.S. adult age, race, and ethnicity. People in good health  
34  
35 and with medical conditions were included and the sampling method was designed to over-  
36  
37 represent people at risk of heart disease or cancer. The PHQ-9 in this report was collected at the  
38  
39 initial study visit in person or online.  
40  
41

42  
43 A pre-BHS pilot study, which tested clinical assessment workflows, was conducted in  
44  
45 200 healthy participants prior to initiation of the primary study. BHS is funded by Verily (San  
46  
47 Francisco, CA) and is managed in collaboration with Stanford University (Stanford, CA), Duke  
48  
49 University (Durham, NC), and the California Health and Longevity Institute (Westlake Village,  
50  
51 CA) with enrolling sites in Durham, NC; Kannapolis, NC; Los Angeles, CA; and Palo Alto, CA.  
52  
53  
54  
55  
56  
57  
58  
59  
60

1  
2  
3  
4 The extended studies have governance approaches specific to the needs of each study. Herein,  
5  
6 we examine a cross-sectional analysis of the first BHS time point PHQ-9 scores.  
7  
8  
9

## 10 **Statistical methods**

11  
12 The statistical methods used in this manuscript have been described previously.<sup>12</sup> Distributional  
13  
14 measures; medians and 25th, 75th percentiles for continuous variables; and counts and  
15  
16 percentages for categorical variables were computed and summarized across each of 5 PHQ-9  
17  
18 severity groups<sup>6</sup> (0, 1–4, 5–9, 10–14, >14), divided by convention to be consistent with prior  
19  
20 studies. The Cochran-Armitage trend test for binomial variables,<sup>13,14</sup> and the Spearman rank  
21  
22 correlation test for continuous variables<sup>15</sup> or categorical variables that are ordinal in nature (e.g.,  
23  
24 education and income), were used to test for linear trend across severity group. Multiple tests  
25  
26 were not adjusted for, given the exploratory nature of this study. Subsequent studies with pre-  
27  
28 planned hypotheses are needed to confirm results.  
29  
30  
31  
32

33  
34 Penalized regression using the least absolute shrinkage and selection operator (LASSO)  
35  
36 was conducted to model physical, phenotypic, and symptom factors that could predict the PHQ-9  
37  
38 score (logarithm of PHQ-9 + 1). Data were randomly split into a training set (approximately 70%  
39  
40 of the data), which was used to build the models, and an independent test set, which was used to  
41  
42 evaluate model performance. The final linear model was trained on the full training set, retaining  
43  
44 all predictors with coefficients not equal to zero, and was evaluated on the held-aside test set.  
45  
46

47  
48 Since inference rather than prediction is the goal of this analysis, we considered 5 sets of  
49  
50 sequential “adjustment” models, consisting of smaller-to-larger covariate lists that were entered  
51  
52 into a LASSO regression model. The LASSO-predicted values resulting from each of the 5  
53  
54 models were used to estimate a covariate-adjusted effect for all other candidate variables.  
55  
56  
57  
58  
59  
60

1  
2  
3  
4 Separate regressions for *each* of the candidate variables that are not included in a given model  
5  
6 were performed to obtain coefficients and confidence intervals (i.e., only the LASSO-predicted  
7  
8 value and the candidate variable to be evaluated were included in each model).  
9

10 The LASSO adjustment models comprise the following covariates: 1) Model 1: age, sex,  
11 and age  $\times$  sex interaction; 2) Model 2: variables from Model 1, plus race and ethnicity,  
12 socioeconomic-related variables (highest education completed, household income, marital status,  
13 employment status, and health insurance), and behavioral-related variables (smoking status,  
14 pack-years smoked, and the Alcohol Use Disorders Identification Test-Consumption [AUDIT-C]  
15 sum score); 3) Model 3: variables from Model 2 plus medical conditions except mental health  
16 disorder diagnoses or disorders directly related to mental health or depression (major depressive  
17 disorder, generalized anxiety disorder, attention deficit hyperactivity disorder, post-traumatic  
18 stress disorder, bipolar disorder, alcohol abuse, drug abuse, and concussion or loss of  
19 consciousness); 4) Model 4: variables from Model 3, plus symptoms and allergies, except those  
20 symptoms that are directly related to mental health or depression (i.e., nervousness, mood  
21 changes, fatigue, lack of energy, change in sleep patterns, change in appetite, and difficulty  
22 concentrating); and 5) Model 5: variables from Model 4, plus all physical health metrics. Patient-  
23 reported outcomes, including measures of anxiety, psychological and social well-being (e.g.,  
24 General Anxiety Disorder-7, World Health Organization Disability Assessment Schedule, and  
25 Satisfaction with Life), and self-reported medical conditions and symptoms related to mental  
26 health or depression, have been reported<sup>6</sup> and were excluded from these analyses to enable a  
27 focus on physical and medical findings. In preliminary analyses, higher PHQ-9 score was  
28 associated with female sex, age, and the age by sex interaction, confirming the well-established  
29 relationship between depression, sex, and age,<sup>16</sup> thereby informing our decision to include age  
30  
31  
32  
33  
34  
35  
36  
37  
38  
39  
40  
41  
42  
43  
44  
45  
46  
47  
48  
49  
50  
51  
52  
53  
54  
55  
56  
57  
58  
59  
60

1  
2  
3 and sex in all models. The key variables included in each covariate model can be found in

4  
5  
6 **eTable 1.**  
7

8 Since LASSO regression techniques require an input dataset with complete data, missing  
9 data were addressed using iterative regression-based imputation, where predictors were first  
10 grouped by data type, then the groups were rank-ordered by the most missing to the least missing  
11 data. The rank of the whole group was based on the amount of missingness of the majority  
12 ( $\geq 50\%$ ) of the fields within that group), and then at each imputation step, the grouped predictors  
13 were used in a regression model to predict the missing data. The PHQ-9 score was imputed in the  
14 last step along with other patient-reported outcome scores and, therefore, all 2502 participants  
15 were included in the LASSO models.  
16  
17  
18  
19  
20  
21  
22  
23  
24  
25

26 To summarize key model findings adjusted for known demographic and socioeconomic-  
27 related risk factors of PHQ-9, 4 groups were created based on the LASSO-predicted value using  
28 Model 1 (age, sex, and age  $\times$  sex interaction) and Model 2 (race, ethnicity, socioeconomic-  
29 related variables and health behaviors). For both models, “high risk” was defined as the top 50%  
30 of the predicted value, while “low risk” was defined as the bottom 50% of the predicted value.  
31  
32 The 2 risk groups from each model were combined to create the following 4 groups: 1) high risk  
33 Model 1 + high risk Model 2; 2) high risk Model 1 + low risk Model 2; 3) low risk Model 1 +  
34 high risk Model 2; and 4) low risk Model 1 + low risk Model 2.  
35  
36  
37  
38  
39  
40  
41  
42  
43  
44  
45  
46

47 **Patient and public involvement statement**  
48

49 From the beginning, BHS has used participant and community engagement methods. Participants  
50 have been involved in feedback sessions, and return of results is a commitment of the project.  
51  
52  
53  
54  
55  
56  
57  
58  
59  
60

1  
2  
3  
4 Community meetings have also been held to assure broad feedback on the goals and conduct of  
5  
6 the project.  
7  
8  
9

## 10 RESULTS

11  
12 The relationship between the PHQ-9 score and key demographic characteristics and vital signs is  
13 shown in **Table 1**. Younger participants, women, people of color, and those of Hispanic ethnicity  
14 had higher PHQ-9 scores. While no difference was observed in blood pressure or temperature,  
15 higher PHQ-9 scores were found in participants with higher resting heart rates, larger body mass  
16 index, greater waist circumference, and higher respiratory rates.  
17  
18  
19  
20  
21  
22  
23

24 PHQ-9 scores as a function of medical history and symptoms are shown in **Table 2** and  
25 **eTable 2**. As expected, participants with other chronic conditions, particularly gastroesophageal  
26 reflux disease, anxiety, and asthma, had higher PHQ-9 scores. A history of diagnosed depression  
27 was highly correlated with elevated PHQ-9. Various symptoms were evident in participants with  
28 higher PHQ-9 scores, with musculoskeletal, mood, and anxiety symptoms proving particularly  
29 prominent.  
30  
31  
32  
33  
34  
35  
36  
37

38 **Table 3** demonstrates the relationship between measures of physical performance and  
39 PHQ-9; differences in 6-minute walk distance, handgrip strength, leg balance, chair stand, and  
40 mean steps are particularly associated with higher PHQ-9.  
41  
42  
43  
44

45 The covariates resulting from each LASSO model are shown in **eTables 3–7**. All other  
46 variables that are not presented in those tables are set to zero by the LASSO regression and  
47 thereby excluded from the final adjustment models. Age remained a top predictor in all models.  
48 Where health behaviors and measures of socioeconomic status were included (i.e., Models 2–5),  
49 smoking status and employment, insurance, and marital status also remained in the models as  
50  
51  
52  
53  
54  
55  
56  
57  
58  
59  
60

1  
2  
3  
4 significant predictors. When medical conditions were added (i.e., Models 3–5), respiratory-  
5  
6 related conditions such as asthma remained in the models, and when symptoms were added (i.e.,  
7  
8 Models 4 and 5), tension, body image concerns, and memory change remained in the models as  
9  
10 top predictors. Model performance was similar between the training and test sets for each model  
11  
12 (Model 1:  $R^2 = 0.032$  vs.  $0.035$ ; Model 2:  $R^2 = 0.117$  vs.  $0.112$ ; Model 3:  $R^2 = 0.167$  vs.  $0.133$ ;  
13  
14 Model 4:  $R^2 = 0.247$  vs.  $0.228$ ; and Model 5:  $R^2 = 0.270$  vs.  $0.240$ , respectively).

17 The interplay of higher PHQ-9 score predictors based on the LASSO regression  
18  
19 adjustment models is shown in **Figures 1–5**. Regardless of adjustment factors included in the  
20  
21 models, memory change, tension, shortness of breath, and indicators of musculoskeletal  
22  
23 symptoms are significantly related to higher PHQ-9 scores (Models 1–3). Further details of the  
24  
25 LASSO analysis are included in the supplementary materials (**eTables 8–12**). Tension, memory  
26  
27 change, and back pain consistently remain in the models after adjustment. When medical  
28  
29 conditions, symptoms, and allergies are taken into account, indicators of obesity (body mass  
30  
31 index, waist circumference) and lack of physical fitness are the most significant predictors of  
32  
33 PHQ-9 score. When physical performance is also factored into the adjustment, laboratory values  
34  
35  
36  
37  
38 are only weakly associated with PHQ-9 scores.  
39  
40  
41  
42  
43  
44  
45  
46  
47  
48  
49  
50  
51  
52  
53  
54  
55  
56  
57  
58  
59  
60

1  
2  
3  
4 **eFigures 1–5** present the distribution of PHQ-9 according to a sample of other health  
5 conditions, such as asthma, sleep apnea and body image concerns, after adjustment for known  
6 demographic and socioeconomic-related risk factors of PHQ-9. The inter-relationships are clear  
7 across this spectrum of measures, emphasizing the importance of understanding all 3 dimensions  
8 when designing interventions.  
9  
10  
11  
12  
13  
14  
15  
16

## 17 **DISCUSSION**

19 Our study reinforces previous observations regarding the relationship between PHQ-9 and  
20 measures of chronic disease and poor physical performance in addition to the critical importance  
21 of social factors and psychological distress, previously published.<sup>12</sup> While these findings are not  
22 surprising, they highlight how PHQ-9 is an entree into a variety of individual- and population-  
23 level concerns that demand more attention. Contextual awareness is critically important when the  
24 PHQ-9 is used in clinical practice<sup>17</sup> as recommended by the U.S. Preventive Services Task  
25 Force<sup>18</sup> for screening within a health system or for public health assessment.  
26  
27  
28  
29  
30  
31  
32  
33  
34  
35

36 This analysis cannot answer questions of cause and effect since it is cross-sectional. The  
37 PHQ-9 and detailed serial measures of biological, clinical, behavioral, and social function will be  
38 assessed in the ongoing BHS longitudinal study; the bi-directional relationship between the  
39 PHQ-9 and these multiple measures will be particularly interesting, as few studies have collected  
40 this amount of detail in a diverse population. This measurement depth of demographic, clinical,  
41 biological, and behavioral issues offers an opportunity to better understand how different aspects  
42 of distress track similarly or differently over time.  
43  
44  
45  
46  
47  
48  
49  
50  
51

52 An important aspect of our examination is how the binary division of PHQ-9 into labels  
53 of depression or “not depression” leaves significant content unattended. While the division of  
54  
55  
56  
57  
58  
59  
60

1  
2  
3  
4 PHQ-9 scores at 10 provides good discrimination with regard to a clinical diagnosis of Major  
5  
6 Depressive Disorder,<sup>6,9,10</sup> the gradient between a score of 0 and 10 contains relevant information  
7  
8 about distress levels. Such a finding is not novel,<sup>19</sup> but a reminder that singular focus on a binary  
9  
10 classification tends to obscure important information. For example, demographic data  
11  
12 demonstrate how females and younger participants had higher PHQ-9 scores, yet whether this  
13  
14 finding represents a different approach to revealing concerns or more significant distress is  
15  
16 unclear.  
17  
18

19  
20 The higher scores associated with elevated heart rates, body mass index, and abdominal  
21  
22 girth were expected and consistent with previous literature. In general, PHQ-9 scores aligned  
23  
24 with musculoskeletal or central and peripheral nervous system disorders,<sup>20,21</sup> but less with  
25  
26 cardiovascular disease, cancer, and other more organ-focused conditions. The previously widely-  
27  
28 reported association with obesity and diabetes was confirmed in our study.<sup>22-25</sup> We found low  
29  
30 PHQ-9 scores in a small, but noticeable proportion of the population with a previous diagnosis of  
31  
32 depression, which could represent diagnostic errors, inaccurate reporting of medical history, or  
33  
34 recovery from a previous episode of depression.  
35  
36

37  
38 The profound relationship between PHQ-9 score and a host of common symptoms<sup>26-30</sup> is  
39  
40 also expected, but the continuous nature of the relationship with PHQ-9 score and the depth of  
41  
42 the relationships raise many issues that need further exploration. Significant predictors of PHQ-9  
43  
44 scores include a wide range of concerns encompassing neurological disease, musculoskeletal  
45  
46 disease,<sup>31,32</sup> and psychological distress. A particularly notable finding is the progressive and  
47  
48 highly significant relationship between reported memory loss and PHQ-9 score. Among people  
49  
50 with PHQ-9 scores of 0, only 1.9% reported memory change, while among those with PHQ-9  
51  
52 scores >15, memory change was reported in 34%.  
53  
54  
55  
56  
57  
58  
59  
60



1  
2  
3  
4 Finally, participants with higher PHQ-9 scores had impaired physical functioning, as  
5  
6 indicated by a host of measurements, including daily steps, 6-minute walk distance, ability to  
7  
8 balance on one leg, or propensity to exert a strong grip. Multiple previous studies have shown  
9  
10 that depression and physical functioning are inter-related<sup>33-38</sup> and that interventions to increase  
11  
12 physical activity can improve depression status.<sup>39,40</sup> Nevertheless, the overall picture of this study  
13  
14 highlights the need for multimodal intervention to enable people with social disadvantages and  
15  
16 physical comorbidities to improve physical and psychological function.  
17  
18  
19  
20  
21

## 22 **Limitations**

23  
24 This study has some limitations. First, the cross-sectional nature of the study limits our ability to  
25  
26 assess the time course of these findings; however, follow-up is currently accruing. The time  
27  
28 course of chronic disease and symptom progression in relation to the PHQ-9 will be of interest.  
29  
30 Second, people with significant depression are probably less likely to volunteer, thereby limiting  
31  
32 the breadth of depression observed in this study; BHS participants are volunteers from selected  
33  
34 sites who express willingness to share data. Third, the population is generally representative of  
35  
36 adult age, sex, race, and ethnicity, but it is not a fully representative sample of the population; the  
37  
38 differences between those who volunteer for digital technology studies and the general  
39  
40 population are well-known.<sup>41</sup> Fourth, we acknowledge the high comorbidity of depression and  
41  
42 anxiety, which is a potential bias; psychological comorbidities are important contextual factors to  
43  
44 consider when assessing depression. We also lack detailed information on depression treatment,  
45  
46 which is a potentially modifying factor. Finally, even though the PHQ-9 is a validated screening  
47  
48 instrument, our study did not include psychiatric interviews.  
49  
50  
51  
52  
53  
54  
55  
56  
57  
58  
59  
60

## Conclusions

PHQ-9 scores are related to multiple demographic, vital sign, and clinical measures that indicate poor physical status. BHS data provide a comprehensive picture of numerous interactive factors influencing PHQ-9 scores, thereby demonstrating how focusing on one chief complaint in hopes of improving depression status is likely futile, given that many common symptoms and physical limitations are profoundly integrated with depression status. The close association with symptoms often considered somatic raises a practical issue for clinical practice, and this is evident across the entire spectrum of PHQ-9 scores. When a high PHQ-9 score or other indicator of depression brings someone to the attention of a clinician, contextual awareness is critically important to provide an effective clinical intervention. When someone has significant neurological or musculoskeletal symptoms, assessment for depression should be a routine consideration. The complex associations across biological, clinical, behavioral, and social factors stress the need for holistic evaluation of depression for individuals, as well as patient populations.

## ACKNOWLEDGMENTS

### Baseline Health Study Team

**American Society of Clinical Oncology, Alexandria, VA, USA:** Richard L. Schilsky. **Duke University, School of Medicine, Durham, NC, USA:** Jennifer Allen, MaryAnn Anderson, Kevin Anstrom, Lucus Araujo, Kristine Arges, Kaveh Ardalán, Bridget Baldwin, Suresh Balu, Mustafa R. Bashir, Manju Bhapkar, Robert Bigelow, Tanya Black, Rosalia Blanco, Gerald Bloomfield, Durga Borkar, Leah Bouk, Ebony Boulware, Nikki Brugnoli, Erin Campbell, Paul Campbell, Larry Carin, Tammy Jo Cassella, Tina Cates, Ranee Chatterjee Montgomery, Victoria Christian, John Choong, Michael Cohen-Wolkowicz, Elizabeth Cook, Scott Cousins, Ashley Crawford, Nisha Datta, Melissa Daubert, James Davis, Jillian Dirkes, Isabelle Doan, Marie Dockery, P. Murali Doraiswamy, Pamela S. Douglas, Shelly Duckworth, Ashley Dunham, Gary Dunn, Ryan Ebersohl, Julie Eckstrand, Vivienne Fang, April Flora, Emily Ford, Lucia Foster, Elizabeth Fraulo, John French, Geoffrey S. Ginsburg, Cindy Green, Latoya Greene, Jeffrey Guptill, Donna Hamel, Jennifer Hamill, Chris Harrington, Rob Harrison, Lauren Hedges, Brooke Heidenfelder, Adrian F. Hernandez, Cindy Heydary, Tim Hicks, Lina Hight, Deborah Hopkins, Erich S. Huang, Grace Huh, Jillian Hurst, Kelly Inman, Gemini Janas, Glenn Jaffee, Janace Johnson, Tiffanie Keaton, Michel Khouri, Daniel King, Jennifer Korzekwinski, Lynne H. Koweeck, Anthony Kuo, Lydia Kwee, Dawn Landis, Rachele Lipsky, Desiree Lopez, Carolyn Lowry, Kelly Marcom, Keith Marsolo, Paige McAdams, Shannon McCall, Robert McGarrah, John McGugan, Dani Mee, Sabrena Mervin-Blake, Prithu Mettu, Mathias Meyer, Justin Meyers, Calire N. Miller, Rebecca Moen, Lawrence H. Muhlbaier, Michael Murphy, Ben Neely, L. Kristin Newby, Jayne Nicoldson, Hoang Nguyen, Maggie Nguyen, Lori O'Brien, Sumru Onal, Jeremey O'Quinn, David Page, Neha J. Pagidipati, Kishan Parikh, Sarah R. Palmer, Bray

1  
2  
3  
4 Patrick-Lake, Brenda Pattison, Michael Pencina, Eric D. Peterson, Jon Piccini, Terry Poole, Tom  
5  
6 Povsic, Alicia Provencher, Dawn Rabineau, Annette Rich, Susan Rimmer, Fides Schwartz,  
7  
8 Angela Serafin, Nishant Shah, Svati Shah, Kelly Shields, Steven Shipes, Peter Shrader, Jon  
9  
10 Stiber, Lynn Sutton, Geeta Swamy, Betsy Thomas, Sandra Torres, Debara Tucci, Anthony  
11  
12 Twisdale, Brooke Walker, Susan A. Whitney, Robin Williamson, Lauren Wilverding, Charlene  
13  
14 A. Wong, Lisa Wruck. **Ellen Young Gemini Group, USA:** Jane Perlmutter. **Health**  
15  
16 **Collaboratory and Cancer 101, New York, NY, USA:** Sarah Krug. **Rare Dots, Inc., USA:** S.  
17  
18 Whitney Bowman-Zatzkin. **Society of Participatory Medicine, USA:** Sarah Krug. **Stanford**  
19  
20 **University, School of Medicine, Stanford, CA, USA:** Themistocles Assimes, Vikram Bajaj,  
21  
22 Maxwell Cheong, Millie Das, Manisha Desai, Alice C. Fan, Dominik Fleischmann, Sanjiv S.  
23  
24 Gambhir, Garry Gold, Francois Haddad, David Hong, Curtis Langlotz, Yaping J. Liao, Rong Lu,  
25  
26 Kenneth W. Mahaffey, David Maron, Rebecca McCue, Rajan Munshi, Fatima Rodriguez,  
27  
28 Sumana Shashidhar, George Sledge, Susie Spielman, Ryan Spitler, Sue Swope, Donna Williams.  
29  
30 **University of Florida, College of Medicine, Gainesville, FL, USA:** Carl J Pepine. **University**  
31  
32 **of Missouri, Children's Mercy Hospital, Kansas City, MO, USA:** John D Lantos. **University**  
33  
34 **of Texas, Dell Medical School, Austin, TX, USA:** Michael Pignone. **University of**  
35  
36 **Washington, Department of Biostatistics, Seattle, WA, USA:** Patrick Heagerty. **Vanderbilt**  
37  
38 **University, School of Medicine, Nashville, TN, USA:** Laura Beskow, Gordon Bernard. **Verily**  
39  
40 **Inc., South San Francisco, CA, USA:** Kelley Abad, Giulia Angi, Robert M. Califf, Lawrence  
41  
42 Deang, Joy Huynh, Manway Liu, Cherry Mao, Michael Magdaleno, William J. Marks, Jr.,  
43  
44 Jessica Mega, David Miller, Nicole Ong, Darshita Patel, Vanessa Ridaura, Scarlet Shore, Sarah  
45  
46 Short, Michelle Tran, Veronica Vu, Celeste Wong. **Harvard University, School of Medicine,**  
47  
48 **Boston, MA, USA:** Robert C. Green. **Google Inc., Mountain View, CA, USA:** John  
49  
50  
51  
52  
53  
54  
55  
56  
57  
58  
59  
60

1  
2  
3 Hernandez. **California Health and Longevity Institute, Westlake Village, CA, USA:** Jolene  
4  
5  
6 Benge, Gislia Negrete, Gelsey Sierra, Terry Schaack  
7  
8  
9

### 10 **Sources of funding**

11  
12 The Baseline Health Study and this analysis were funded by Verily Life Sciences, San Francisco,  
13  
14 CA.  
15  
16  
17  
18

### 19 **Conflict of interest disclosures**

20  
21  
22 **Califf:** Employee of Verily Life Sciences and Google Health; Board member for Cytokinetics,  
23  
24 United Medicines, and Clinetic.  
25

26  
27 **Wong:** Employee of Verily Life Sciences.  
28

29  
30 **Doraiswamy:** Consulting fees from Verily Life Sciences, Neuronix, Apollo Health, VitaKey,  
31  
32 Neuroglee, Transposon, Otsuka; Research grants from Avanir, Lilly, Avid, Salix; Holds stock in  
33  
34 Evidation Health, Advera Health Analytics, Transposon Therapeutics, Marvel Biome; Board  
35  
36 membership in Apollo; Coinventor on patents for diagnosis or treatment of neuropsychiatric  
37  
38 disorders.  
39

40  
41 **Hong:** Research funding from NIMH; Consulting for Little Otter.  
42

43  
44 **Miller:** Employee of and holds stock in Verily Life Sciences.  
45

46  
47  
48  
49 **Mega:** Employee of Verily Life Sciences.  
50

### 51 **Author contributions**

52  
53 **Califf:** Dr. Califf had full access to all of the data in the study and takes responsibility for the  
54  
55 integrity of the data and the accuracy of the data analysis. Dr. Califf contributed to the  
56  
57  
58  
59

1  
2  
3  
4 conception and design of the study, the data analysis, the data interpretation, the manuscript  
5  
6 drafting, and the critical revision of the manuscript.  
7

8 **Wong:** Dr. Wong contributed to the conception and design of the study, data interpretation, the  
9  
10 manuscript drafting, and the critical revision of the manuscript.  
11

12 **Doraiswamy:** Dr. Doraiswamy contributed to the data interpretation, the manuscript drafting,  
13  
14 and the critical revision of the manuscript.  
15

16 **Hong:** Dr. Hong contributed to the data interpretation, the manuscript drafting, and the critical  
17  
18 revision of the manuscript.  
19

20 **Miller:** Dr. Miller contributed to the conception and design of the study, data interpretation, the  
21  
22 manuscript drafting, and the critical revision of the manuscript.  
23

24 **Mega:** Dr. Mega contributed to the conception and design of the study, the supervision, data  
25  
26 acquisition, data interpretation, the manuscript drafting, and the critical revision of the  
27  
28 manuscript.  
29  
30  
31  
32

### 33 34 35 **Data Sharing Statement**

36  
37  
38 The Baseline Study data will be available to qualified researchers for exploratory analysis after  
39  
40 the data are adequately curated and initial planned primary manuscripts are written. Qualified  
41  
42 external researchers will be able to apply through applications reviewed by the Proposal Review  
43  
44 and Publications Committee and Scientific Executive Committee.  
45  
46  
47  
48

### 49 **Ethics Statement**

50  
51  
52  
53  
54  
55  
56  
57  
58  
59  
60

1  
2  
3  
4 This study involves human participants and was approved by an Ethics Committee(s) or

5  
6 Institutional Board(s):

7  
8 Approved by: wcg IRB

9  
10 Work order #: 1-1379515-1

11  
12 IRB tracking #: 20170163

13  
14 Approval expires: 02/27/2022

15  
16 Continuing review frequency: annual  
17  
18  
19  
20  
21  
22  
23  
24  
25  
26  
27  
28  
29  
30  
31  
32  
33  
34  
35  
36  
37  
38  
39  
40  
41  
42  
43  
44  
45  
46  
47  
48  
49  
50  
51  
52  
53  
54  
55  
56  
57  
58  
59  
60

## REFERENCES

1. GBD 2017 Disease and Injury Incidence and Prevalence Collaborators. Global, regional, and national incidence, prevalence, and years lived with disability for 354 diseases and injuries for 195 countries and territories, 1990–2017: a systematic analysis for the Global Burden of Disease Study 2017. *Lancet*. 2018;392(10159):1789–1858.
2. Perry PJ. *The Interaction of Major Depression and Medical Illness*. Medscape; 2005. Available at: <https://www.medscape.org/viewarticle/517033>.
3. Kampling H, Baumeister H, Bengel J, et al. Prevention of depression in adults with long-term physical conditions, *Cochrane Database Syst Rev*. 2021;3(3):CD011246.
4. Zhdanova M, Kuvadia H, Joshi K, et al. Economic burden of treatment-resistant depression in privately insured U.S. patients with physical conditions. *J Manag Care Spec Pharm*. 2020;26(8):996–1007.
5. Rosenblat JD, Kurdyak P, Cosci F, et al. Depression in the medically ill. *Aust N Z J Psychiatry*. 2020;54(4):346–366.
6. Kroenke K, Spitzer RL, Williams JB. The PHQ-9: validity of a brief depression severity measure. *J Gen Intern Med*. 2001;16(9):606–613.
7. Huang FY, Chung H, Kroenke K, Delucchi KL, Spitzer RL. Using the Patient Health Questionnaire-9 to measure depression among racially and ethnically diverse primary care patients. *J Gen Intern Med*. 2006;21(6):547–552.
8. Patel JS, Oh Y, Rand KL, et al. Measurement invariance of the patient health questionnaire-9 (PHQ-9) depression screener in U.S. adults across sex, race/ethnicity, and education level: NHANES 2005–2016. *Depress Anxiety*. 2019;36(9):813–823.



- 1  
2  
3  
4 9. Levis B, Benedetti A, Thombs BD for the DEPRESSion Screening Data (DEPRESSD)  
5  
6 Collaboration. Accuracy of Patient Health Questionnaire-9 (PHQ-9) for screening to  
7  
8 detect major depression: individual participant data meta-analysis. *BMJ*. 2019;365:1476.  
9
- 10  
11 10. Levis B, Sun Y, He C, et al. Accuracy of the PHQ-2 alone and in combination with the  
12  
13 PHQ-9 for screening to detect major depression: systematic review and meta-analysis.  
14  
15 *JAMA*. 2020;323(22):2290–2300.  
16
- 17  
18 11. Arges K, Assimes T, Bajaj V, et al. The Project Baseline Health Study: a step towards a  
19  
20 broader mission to map human health. *NPJ Digit Med*. 2020;3:84.  
21
- 22  
23 12. Califf RM, Wong C, Doraiswamy PM, Hong DS, Miller DP, Mega JL; Baseline Study  
24  
25 Group. Importance of social determinants in screening for depression. *J Gen Intern Med*.  
26  
27 2021. doi: 10.1007/s11606-021-06957-5. [Online ahead of print].  
28
- 29  
30 13. Armitage P. Tests for linear trends in proportions and frequencies. *Biometrics*.  
31  
32 1955;11(3):375–386.  
33
- 34  
35 14. Liu L, Berger VW, Hershberger SL. Trend tests for counts and proportions. Wiley  
36  
37 *StatsRef: Statistics Reference Online*. 2014.  
38  
39 <https://doi.org/10.1002/9781118445112.stat06163>.  
40
- 41  
42 15. Mukaka MM. A guide to appropriate use of Correlation coefficient in medical research.  
43  
44 *Malawi Med J*. 2012;24(3):69–71.  
45
- 46  
47 16. CDC  
48  
49 17. Spitzer RL, Kroenke K, Williams JB. Validation and utility of a self-report version of  
50  
51 PRIME-MD: the PHQ primary care study. *Primary Care Evaluation of Mental Disorders*.  
52  
53 Patient Health Questionnaire. *JAMA*. 1999;282(18):1737–1744.  
54  
55  
56  
57  
58  
59  
60

- 1  
2  
3  
4 18. Siu AL, US Preventive Services Task Force (USPSTF), Bibbins-Domingo K, et al.  
5  
6 Screening for depression in adults: US Preventive Services Task Force Recommendation  
7  
8 Statement. *JAMA*. 2016;315(4):380–387.  
9
- 10  
11 19. Thombs BD, Benedetti A, Kloda LA, et al. The diagnostic accuracy of the Patient Health  
12  
13 Questionnaire-2 (PHQ-2), Patient Health Questionnaire-8 (PHQ-8), and Patient Health  
14  
15 Questionnaire-9 (PHQ-9) for detecting major depression: protocol for a systematic  
16  
17 review and individual patient data meta-analyses. *Syst Rev*. 2014;3:124.  
18
- 19  
20 20. Hoshino E, Ohde S, Rahman M, Takahashi O, Fukui T, Deshpande GA. Variation in  
21  
22 somatic symptoms by patient health questionnaire-9 depression scores in a representative  
23  
24 Japanese sample. *BMC Public Health*. 2018;18(1):1406.  
25
- 26  
27 21. Leavens A, Patten SB, Hudson M, Baron M, Thombs BD; Canadian Scleroderma  
28  
29 Research Group. Influence of somatic symptoms on Patient Health Questionnaire-9  
30  
31 depression scores among patients with systemic sclerosis compared to a healthy general  
32  
33 population sample. *Arthritis Care Res (Hoboken)*. 2012;64(8):1195–1201.  
34
- 35  
36 22. Snoek FJ, Bremmer MA, Hermanns N. Constructs of depression and distress in diabetes:  
37  
38 time for an appraisal. *Lancet Diabetes Endocrinol*. 2015;3(6):450–460.  
39
- 40  
41 23. Nouwen A, Winkley K, Twisk J, et al. Type 2 diabetes mellitus as a risk factor for the  
42  
43 onset of depression: a systematic review and meta-analysis. *Diabetologia*.  
44  
45 2010;53(12):2480–2486.  
46
- 47  
48 24. Ciechanowski PS, Katon WJ, Russo JE. Depression and diabetes: impact of depressive  
49  
50 symptoms on adherence, function, and costs. *Arch Intern Med*. 2000;160(21):3278–3285.  
51  
52  
53  
54  
55  
56  
57  
58  
59

- 1  
2  
3  
4 25. Lustman PJ, Anderson RJ, Freedland KE, de Groot M, Carney RM, Clouse RE.  
5  
6 Depression and poor glyceimic control: a meta-analytic review of the literature. *Diabetes*  
7  
8 *Care*. 2000;23(7):934–942.  
9
- 10 26. Kroenke K, Spitzer RL, Williams JB. The PHQ-15: validity of a new measure for  
11  
12 evaluating the severity of somatic symptoms. *Psychosom Med*. 2002;64(2):258–266.  
13  
14
- 15 27. Kocalevent RD, Hinz A, Brähler E. Standardization of a screening instrument (PHQ-15)  
16  
17 for somatization syndromes in the general population. *BMC Psychiatry*. 2013;13:91.  
18  
19
- 20 28. Löwe B, Spitzer RL, Williams JB, Mussell M, Schellberg D, Kroenke K. Depression,  
21  
22 anxiety and somatization in primary care: syndrome overlap and functional impairment.  
23  
24 *Gen Hosp Psychiatry*. 2008;30(3):191–199.  
25
- 26 29. Ziebold C, Goldberg DP, Reed GM, et al. Dimensional analysis of depressive, anxious  
27  
28 and somatic symptoms presented by primary care patients and their relationship with  
29  
30 ICD-11 PHC proposed diagnoses. *Psychol Med*. 2019;49(5):764–771.  
31  
32
- 33 30. Kroenke K, Spitzer RL, Williams JB, Löwe B. The Patient Health Questionnaire  
34  
35 Somatic, Anxiety, and Depressive Symptom Scales: a systematic review. *Gen Hosp*  
36  
37 *Psychiatry*. 2010;32(4):345–359.  
38  
39
- 40 31. Hartvigsen J, Christensen K. Pain in the back and neck are with us until the end: a  
41  
42 nationwide interview-based survey of Danish 100-year-olds. *Spine (Phila Pa 1976)*.  
43  
44 2008;33(8):909–913.  
45  
46
- 47 32. Reichborn-Kjennerud T, Stoltenberg C, Tambs K, et al. Back-neck pain and symptoms of  
48  
49 anxiety and depression: a population-based twin study. *Psychol Med*. 2002;32(6):1009–  
50  
51 1020.  
52  
53  
54  
55  
56  
57  
58  
59  
60

- 1  
2  
3  
4 33. Zhang J, Yen ST. Physical activity, gender difference, and depressive symptoms. *Health*  
5 *Serv Res*. 2015 Oct;50(5):1550–173.  
6  
7  
8 34. Farmer ME, Locke BZ, Mościcki EK, Dannenberg AL, Larson DB, Radloff LS. Physical  
9 activity and depressive symptoms: the NHANES I Epidemiologic Follow-up Study. *Am J*  
10 *Epidemiol*. 1988;128(6):1340–1351.  
11  
12  
13  
14  
15 35. Helgadóttir B, Forsell Y, Ekblom Ö. Physical activity patterns of people affected by  
16 depressive and anxiety disorders as measured by accelerometers: a cross-sectional study.  
17 *PLoS One*. 2015;10(1):e0115894.  
18  
19  
20  
21  
22 36. Sieverdes JC, Ray BM, Sui X, et al. Association between leisure time physical activity  
23 and depressive symptoms in men. *Med Sci Sports Exerc*. 2012;44(2):260–265.  
24  
25  
26  
27 37. Sun GZ, Ye N, Wu SJ, Zhou Y, Sun YX. 10-year ASCVD risk is positively correlated  
28 with depressive symptoms in a large general population. *BMC Psychiatry*.  
29 2019;19(1):125.  
30  
31  
32  
33 38. Jha MK, Qamar A, Vaduganathan M, Charney DS, Murrough JW. Screening and  
34 management of depression in patients with cardiovascular disease: JACC State-of-the-Art  
35 Review. *J Am Coll Cardiol*. 2019;73(14):1827–1845.  
36  
37  
38  
39  
40 39. Wegner M, Helmich I, Machado S, Nardi AE, Arias-Carrion O, Budde H. Effects of  
41 exercise on anxiety and depression disorders: review of meta- analyses and  
42 neurobiological mechanisms. *CNS Neurol Disord Drug Targets*. 2014;13(6):1002–1014.  
43  
44  
45  
46  
47 40. Blumenthal JA, Babyak MA, Doraiswamy PM, et al. Exercise and pharmacotherapy in  
48 the treatment of major depressive disorder. *Psychosomatic Med*. 2007;69(7):587–596.  
49  
50  
51  
52  
53  
54  
55  
56  
57  
58  
59  
60

- 1  
2  
3  
4 41. Fareed N, Swoboda CM, Jonnalagadda P, Huerta TR. Persistent digital divide in health-  
5 related internet use among cancer survivors: findings from the Health Information  
6 National Trends Survey, 2003–2018. J Cancer Surviv. 2021;15(1):87–98.  
7  
8  
9  
10  
11  
12  
13  
14  
15  
16  
17  
18  
19  
20  
21  
22  
23  
24  
25  
26  
27  
28  
29  
30  
31  
32  
33  
34  
35  
36  
37  
38  
39  
40  
41  
42  
43  
44  
45  
46  
47  
48  
49  
50  
51  
52  
53  
54  
55  
56  
57  
58  
59  
60

**Table 1. Demographics: PHQ-9 score**

|                                  | <b>PHQ-9 0<br/>(N=484)</b> | <b>PHQ-9 1-4<br/>(N=1086)</b> | <b>PHQ-9 5-9<br/>(N=518)</b> | <b>PHQ-9 10-14<br/>(N=184)</b> | <b>PHQ-9 15+<br/>(N=93)</b> |
|----------------------------------|----------------------------|-------------------------------|------------------------------|--------------------------------|-----------------------------|
| Age, median (25th, 75th)*        | 53.6 (36.7, 66.1)          | 51.7 (37.0, 66.5)             | 47.6 (32.7, 60.7)            | 42.8 (31.2, 55.1)              | 42.4 (32.1, 54.2)           |
| Female sex*                      | 227 (46.9)                 | 622 (57.3)                    | 299 (57.7)                   | 108 (58.7)                     | 62 (66.7)                   |
| Race                             |                            |                               |                              |                                |                             |
| Black                            | 80 (16.5)                  | 153 (14.1)                    | 82 (15.8)                    | 31 (16.8)                      | 19 (20.4)                   |
| White                            | 294 (60.7)                 | 731 (67.3)                    | 323 (62.4)                   | 110 (59.8)                     | 57 (61.3)                   |
| Asian†                           | 64 (13.2)                  | 113 (10.4)                    | 47 (9.1)                     | 15 (8.2)                       | 5 (5.4)                     |
| NHOPI                            | 7 (1.4)                    | 11 (1)                        | 7 (1.4)                      | 2 (1.1)                        | 0 (0.0)                     |
| American Indian or Alaska Native | 4 (0.8)                    | 8 (0.7)                       | 11 (2.1)                     | 3 (1.6)                        | 1 (1.1)                     |
| Other†                           | 35 (7.2)                   | 70 (6.4)                      | 48 (9.3)                     | 23 (12.5)                      | 11 (11.8)                   |
| Ethnicity                        |                            |                               |                              |                                |                             |
| Hispanic                         | 54 (11.2)                  | 108 (9.9)                     | 69 (13.3)                    | 26 (14.1)                      | 13 (14.0)                   |
| Site                             |                            |                               |                              |                                |                             |
| Los Angeles                      | 94 (19.4)                  | 194 (17.9)                    | 111 (21.4)                   | 35 (19)                        | 21 (22.6)                   |
| Durham                           | 99 (20.5)                  | 196 (18.0)                    | 102 (19.7)                   | 40 (21.7)                      | 25 (26.9)                   |
| Kannapolis                       | 100 (20.7)                 | 226 (20.8)                    | 105 (20.3)                   | 41 (22.3)                      | 28 (30.1)                   |
| Palo Alto †                      | 191 (39.5)                 | 470 (43.3)                    | 200 (38.6)                   | 68 (37.0)                      | 19 (20.4)                   |

|                                                                                                                                                                                                                                                                                                                                                                                                                         |                      |                      |                      |                      |                      |
|-------------------------------------------------------------------------------------------------------------------------------------------------------------------------------------------------------------------------------------------------------------------------------------------------------------------------------------------------------------------------------------------------------------------------|----------------------|----------------------|----------------------|----------------------|----------------------|
| Systolic BP, median (25th, 75th), mm Hg                                                                                                                                                                                                                                                                                                                                                                                 | 123.0 (112.5, 133.1) | 122.0 (112.0, 132.5) | 123.0 (112.5, 133.5) | 119.5 (109.9, 132.0) | 122.5 (115.5, 130.5) |
| Diastolic BP, median (25th, 75th), mm Hg                                                                                                                                                                                                                                                                                                                                                                                | 75.5 (69.0, 82.0)    | 75.0 (68.0, 82.0)    | 76.0 (70.0, 83.5)    | 74.0 (68.9, 81.1)    | 77.5 (71.5, 84.0)    |
| Body mass index, median (25th, 75th), kg/m <sup>2</sup> *                                                                                                                                                                                                                                                                                                                                                               | 26.5 (23.7, 29.9)    | 26.1 (22.9, 31.0)    | 28.0 (24.5, 33.2)    | 29.1 (25.1, 34.7)    | 30.0 (25.4, 38.8)    |
| Waist circumference, median (25th, 75th), cm*                                                                                                                                                                                                                                                                                                                                                                           | 91.0 (81.0, 100.1)   | 88.9 (78.7, 101.6)   | 93.0 (81.3, 105.4)   | 96.5 (82.0, 111.8)   | 96.5 (81.6, 112.5)   |
| Heart rate, median (25th, 75th), beats/min*                                                                                                                                                                                                                                                                                                                                                                             | 65.0 (58.0, 72.0)    | 66.0 (59.0, 73.0)    | 67.0 (60.0, 77.0)    | 70.0 (61.8, 80.0)    | 75.0 (65.0, 82.0)    |
| Respiratory rate, median (25th, 75th), breaths/min*                                                                                                                                                                                                                                                                                                                                                                     | 16.0 (14.0, 16.0)    | 16.0 (14.0, 16.0)    | 16.0 (14.0, 17.0)    | 16.0 (14.0, 18.0)    | 16.0 (16.0, 18.0)    |
| Oxygen saturation, median (25th, 75th), %†                                                                                                                                                                                                                                                                                                                                                                              | 99.0 (98.0, 100.0)   | 99.0 (98.0, 100.0)   | 99.0 (98.0, 100.0)   | 99.0 (97.0, 100.0)   | 98.0 (97.0, 100.0)   |
| <p>Data shown are no. (%), unless otherwise indicated.<br/>           BP, blood pressure; NHOPI, Native Hawaiians and other Pacific Islanders; PHQ-9, Patient Health Questionnaire-9.<br/>           P-values for trend were calculated with the use of Spearman Correlation or Cochran-Armitage tests, where appropriate.<br/>           *P-value for trend &lt;0.0001.<br/>           †P-value for trend &lt;0.01</p> |                      |                      |                      |                      |                      |

**Table 2. Medical history: PHQ-9 score**

|                                          | <b>PHQ-9 0<br/>(N=484)</b> | <b>PHQ-9 1-4<br/>(N=1086)</b> | <b>PHQ-9 5-9<br/>(N=518)</b> | <b>PHQ-9 10-14<br/>(N=184)</b> | <b>PHQ-9<br/>15+<br/>(N=93)</b> |
|------------------------------------------|----------------------------|-------------------------------|------------------------------|--------------------------------|---------------------------------|
| Alcohol use disorder*                    | 1 (0.2)                    | 20 (1.8)                      | 12 (2.3)                     | 7 (3.8)                        | 6 (6.5)                         |
| Fibromyalgia*                            | 2 (0.4)                    | 10 (0.9)                      | 11 (2.1)                     | 7 (3.8)                        | 6 (6.5)                         |
| Bipolar disorder*                        | 3 (0.6)                    | 9 (0.8)                       | 12 (2.3)                     | 9 (4.9)                        | 8 (8.6)                         |
| PTSD*                                    | 8 (1.7)                    | 14 (1.3)                      | 15 (2.9)                     | 21 (11.4)                      | 9 (9.7)                         |
| COPD with emphysema*                     | 5 (1.0)                    | 19 (1.7)                      | 22 (4.2)                     | 12 (6.5)                       | 10 (10.8)                       |
| ADHD*                                    | 15 (3.1)                   | 50 (4.6)                      | 33 (6.4)                     | 25 (13.6)                      | 11 (11.8)                       |
| Asthma*                                  | 46 (9.5)                   | 157 (14.5)                    | 79 (15.3)                    | 39 (21.2)                      | 19 (20.4)                       |
| Migraine*                                | 29 (6.0)                   | 134 (12.3)                    | 77 (14.9)                    | 31 (16.8)                      | 19 (20.4)                       |
| GERD*                                    | 64 (13.2)                  | 176 (16.2)                    | 106 (20.5)                   | 40 (21.7)                      | 23 (24.7)                       |
| Anxiety*                                 | 13 (2.7)                   | 98 (9.0)                      | 109 (21.0)                   | 55 (29.9)                      | 34 (36.6)                       |
| Depression*                              | 16 (3.3)                   | 93 (8.6)                      | 110 (21.2)                   | 63 (34.2)                      | 55 (59.1)                       |
| Itching skin*                            | 19 (3.9)                   | 81 (7.5)                      | 50 (9.7)                     | 30 (16.3)                      | 10 (10.8)                       |
| Sinus pain*                              | 18 (3.7)                   | 77 (7.1)                      | 58 (11.2)                    | 21 (11.4)                      | 10 (10.8)                       |
| Urgency*                                 | 13 (2.7)                   | 69 (6.4)                      | 46 (8.9)                     | 23 (12.5)                      | 10 (10.8)                       |
| Excessive belching or<br>passing of gas* | 24 (5.0)                   | 84 (7.7)                      | 54 (10.4)                    | 29 (15.8)                      | 13 (14.0)                       |
| Dryness*                                 | 35 (7.2)                   | 113 (10.4)                    | 68 (13.1)                    | 39 (21.2)                      | 14 (15.1)                       |
| Heartburn*                               | 27 (5.6)                   | 94 (8.7)                      | 70 (13.5)                    | 42 (22.8)                      | 15 (16.1)                       |
| Dry mouth*                               | 27 (5.6)                   | 84 (7.7)                      | 64 (12.4)                    | 28 (15.2)                      | 16 (17.2)                       |
| Constipation*                            | 22 (4.5)                   | 98 (9.0)                      | 64 (12.4)                    | 48 (26.1)                      | 17 (18.3)                       |
| Numbness or loss of<br>sensation*        | 17 (3.5)                   | 54 (5.0)                      | 38 (7.3)                     | 19 (10.3)                      | 17 (18.3)                       |
| Cramping*                                | 14 (2.9)                   | 62 (5.7)                      | 45 (8.7)                     | 18 (9.8)                       | 18 (19.4)                       |
| Frequency of urination*                  | 33 (6.8)                   | 90 (8.3)                      | 73 (14.1)                    | 34 (18.5)                      | 19 (20.4)                       |
| Swelling in calves, legs, or<br>feet*    | 15 (3.1)                   | 62 (5.7)                      | 49 (9.5)                     | 31 (16.8)                      | 20 (21.5)                       |
| Coughing up sputum*                      | 12 (2.5)                   | 62 (5.7)                      | 56 (10.8)                    | 27 (14.7)                      | 20 (21.5)                       |
| Pain or stiffness in neck*               | 32 (6.6)                   | 128 (11.8)                    | 72 (13.9)                    | 49 (26.6)                      | 22 (23.7)                       |
| Diarrhea*                                | 24 (5.0)                   | 99 (9.1)                      | 70 (13.5)                    | 31 (16.8)                      | 22 (23.7)                       |
| Night sweats*                            | 22 (4.5)                   | 88 (8.1)                      | 65 (12.5)                    | 25 (13.6)                      | 22 (23.7)                       |
| Lightheadedness*                         | 11 (2.3)                   | 62 (5.7)                      | 53 (10.2)                    | 37 (20.1)                      | 22 (23.7)                       |



|                                       |           |            |            |           |           |
|---------------------------------------|-----------|------------|------------|-----------|-----------|
| Cough *                               | 36 (7.4)  | 98 (9.0)   | 83 (16.0)  | 41 (22.3) | 23 (24.7) |
| Tingling or numbness in extremities * | 35 (7.2)  | 101 (9.3)  | 74 (14.3)  | 36 (19.6) | 23 (24.7) |
| Leg cramps *                          | 31 (6.4)  | 103 (9.5)  | 55 (10.6)  | 31 (16.8) | 23 (24.7) |
| Shortness of breath with exercise *   | 11 (2.3)  | 59 (5.4)   | 68 (13.1)  | 37 (20.1) | 23 (24.7) |
| Joint pain or swelling*               | 42 (8.7)  | 140 (12.9) | 81 (15.6)  | 45 (24.5) | 25 (26.9) |
| Sleeping pattern changes *            | 21 (4.3)  | 126 (11.6) | 78 (15.1)  | 47 (25.5) | 25 (26.9) |
| Tingling or pins and needles *        | 30 (6.2)  | 91 (8.4)   | 75 (14.5)  | 36 (19.6) | 25 (26.9) |
| Appetite changes *                    | 9 (1.9)   | 36 (3.3)   | 35 (6.8)   | 25 (13.6) | 26 (28.0) |
| Heat or cold intolerance *            | 17 (3.5)  | 85 (7.8)   | 65 (12.5)  | 36 (19.6) | 27 (29.0) |
| Shortness of breath *                 | 8 (1.7)   | 51 (4.7)   | 57 (11.0)  | 34 (18.5) | 27 (29.0) |
| Bloating *                            | 26 (5.4)  | 104 (9.6)  | 61 (11.8)  | 41 (22.3) | 29 (31.2) |
| Body image concerns *                 | 9 (1.9)   | 40 (3.7)   | 46 (8.9)   | 33 (17.9) | 29 (31.2) |
| Nasal stuffiness *                    | 70 (14.5) | 218 (20.1) | 141 (27.2) | 53 (28.8) | 30 (32.3) |
| Urination at night *                  | 69 (14.3) | 172 (15.8) | 105 (20.3) | 43 (23.4) | 30 (32.3) |
| Muscle or joint pain*                 | 71 (14.7) | 225 (20.7) | 142 (27.4) | 61 (33.2) | 31 (33.3) |
| Memory change*                        | 9 (1.9)   | 52 (4.8)   | 55 (10.6)  | 41 (22.3) | 32 (34.4) |
| Headache*                             | 28 (5.8)  | 151 (13.9) | 104 (20.1) | 44 (23.9) | 38 (40.9) |
| Fatigue*                              | 10 (2.1)  | 129 (11.9) | 113 (21.8) | 65 (35.3) | 38 (40.9) |
| Stiffness*                            | 76 (15.7) | 267 (24.6) | 121 (23.4) | 63 (34.2) | 39 (41.9) |
| Backache*                             | 43 (8.9)  | 183 (16.9) | 148 (28.6) | 63 (34.2) | 39 (41.9) |
| Nervousness*                          | 4 (0.8)   | 46 (4.2)   | 51 (9.8)   | 39 (21.2) | 43 (46.2) |
| Mood change*                          | 6 (1.2)   | 36 (3.3)   | 60 (11.6)  | 42 (22.8) | 44 (47.3) |
| Difficulty concentrating*             | 8 (1.7)   | 58 (5.3)   | 74 (14.3)  | 54 (29.3) | 50 (53.8) |
| Neck or low back pain*                | 73 (15.1) | 264 (24.3) | 185 (35.7) | 73 (39.7) | 51 (54.8) |
| Tension*                              | 10 (2.1)  | 84 (7.7)   | 86 (16.6)  | 44 (23.9) | 51 (54.8) |
| Lack of energy*                       | 6 (1.2)   | 92 (8.5)   | 115 (22.2) | 74 (40.2) | 53 (57.0) |

Data presented as no. (%).

ADHD, attention deficit hyperactivity disorder; COPD, chronic obstructive pulmonary disease; GERD, gastroesophageal reflux disease; PHQ-9, Patient Health Questionnaire-9; PTSD, post-traumatic stress disorder.

P-values for trend were calculated with the use of Spearman Correlation or Cochran-Armitage tests, where appropriate.

\*P-value for trend <0.0001.

**Table 3. Physical Functioning: PHQ-9 Score**

|                                                                                                                                                                                                                                                                                                                                                                                                                             | <b>PHQ-9 0<br/>(N=484)</b> | <b>PHQ-9 1-4<br/>(N=1086)</b> | <b>PHQ-9 5-9<br/>(N=518)</b> | <b>PHQ-9 10-14<br/>(N=184)</b> | <b>PHQ-9 15+<br/>(N=93)</b> |
|-----------------------------------------------------------------------------------------------------------------------------------------------------------------------------------------------------------------------------------------------------------------------------------------------------------------------------------------------------------------------------------------------------------------------------|----------------------------|-------------------------------|------------------------------|--------------------------------|-----------------------------|
| 6-minute walk*                                                                                                                                                                                                                                                                                                                                                                                                              | 485.5 (444.0, 543.2)       | 480.0 (431.7, 530.3)          | 465.0 (422.0, 517.6)         | 460.1 (403.8, 511.9)           | 443.0 (391.2, 492.4)        |
| 30-second chair stand*                                                                                                                                                                                                                                                                                                                                                                                                      | 15.0 (12.0, 18.0)          | 14.0 (12.0, 17.0)             | 13.0 (11.0, 16.0)            | 13.0 (10.0, 16.0)              | 12.0 (10.0, 15.0)           |
| Mean leg balance time†                                                                                                                                                                                                                                                                                                                                                                                                      | 60.0 (23.5, 60.0)          | 55.0 (21.4, 60.0)             | 50.5 (14.0, 60.0)            | 49.5 (11.0, 60.0)              | 44.0 (12.5, 60.0)           |
| 10-meter walk speed*                                                                                                                                                                                                                                                                                                                                                                                                        | 2.0 (1.8, 2.2)             | 2.0 (1.8, 2.2)                | 2.0 (1.6, 2.1)               | 1.8 (1.5, 2.0)                 | 1.8 (1.5, 2.0)              |
| Handgrip†                                                                                                                                                                                                                                                                                                                                                                                                                   | 35.8 (27.8, 44.4)          | 32.5 (26.3, 42.5)             | 32.3 (26.4, 42.8)            | 33.4 (25.6, 40.7)              | 30.0 (22.0, 39.7)           |
| Sit-rise score                                                                                                                                                                                                                                                                                                                                                                                                              | 8.0 (6.0, 9.0)             | 8.0 (6.0, 9.0)                | 8.0 (6.0, 9.0)               | 8.0 (6.0, 9.0)                 | 7.5 (5.0, 9.0)              |
| EF at rest, %                                                                                                                                                                                                                                                                                                                                                                                                               | 59.0 (55.8, 60.5)          | 58.8 (55.9, 60.5)             | 59.2 (56.1, 60.5)            | 59.2 (56.0, 61.4)              | 58.9 (56.0, 60.9)           |
| Mean steps in first 30 days*                                                                                                                                                                                                                                                                                                                                                                                                | 8398.0 (6560.6, 10709.6)   | 8172.2 (6220.6, 10335.7)      | 7666.7 (5128.2, 9862.5)      | 7008.4 (4673.5, 9821.8)        | 6498.1 (4684.1, 9044.5)     |
| Coronary calcium score†                                                                                                                                                                                                                                                                                                                                                                                                     | 0.0 (0.0, 33.9)            | 0.0 (0.0, 42.6)               | 0.0 (0.0, 8.8)               | 0.0 (0.0, 7.1)                 | 0.0 (0.0, 1.9)              |
| FEV1/FVC                                                                                                                                                                                                                                                                                                                                                                                                                    | 0.8 (0.7, 0.8)             | 0.8 (0.7, 0.8)                | 0.8 (0.7, 0.8)               | 0.8 (0.7, 0.8)                 | 0.8 (0.7, 0.8)              |
| ABI †                                                                                                                                                                                                                                                                                                                                                                                                                       | 1.1 (1.1, 1.2)             | 1.1 (1.1, 1.2)                | 1.1 (1.1, 1.2)               | 1.1 (1.0, 1.2)                 | 1.1 (1.0, 1.2)              |
| <p>Data presented as median (25th, 75th percentile).<br/> ABI, ankle brachial index; EF, ejection fraction; FEV1, forced expiratory volume in 1 second; FVC, forced vital capacity; PHQ-9, Patient Health Questionnaire.<br/> P-values for trend were calculated with the use of Spearman Correlation or Cochran-Armitage tests, where appropriate.<br/> *P-value for trend &lt;0.01.<br/> †P-value for trend &lt;0.001</p> |                            |                               |                              |                                |                             |

## FIGURE LEGENDS

### **Figure 1. Top 30 Factors Associated with PHQ-9 Score Adjusted by Age, Sex, and Age by Sex Interaction**

LASSO regression model 1 comprised age, sex, and age by sex interaction. The LASSO-predicted value was used to estimate a covariate-adjusted effect for all other candidate variables.

BMI, body mass index; LASSO, least absolute shrinkage and selection operator; PHQ-9, Patient Health Questionnaire-9; WBC, white blood cell

### **Figure 2. Top 30 Factors Associated with PHQ-9 Score Adjusted by Age, Sex, Age by Sex Interaction, Race, Ethnicity, Socioeconomic Status and Health Behaviors**

LASSO regression model 2 comprised age, sex, age by sex interaction, race, ethnicity, socioeconomic status and health behaviors. The LASSO-predicted value was used to estimate a covariate-adjusted effect for all other candidate variables.

BMI, body mass index; LASSO, least absolute shrinkage and selection operator; PHQ-9, Patient Health Questionnaire-9

### **Figure 3. Top 30 Factors Associated with PHQ-9 Score Adjusted by Age, Sex, Age by Sex Interaction, Race, Ethnicity, Socioeconomic Status, Health Behaviors, and Medical Conditions**

LASSO regression model 3 comprised age, sex, age by sex interaction, race, ethnicity, socioeconomic status, health behaviors, and medical conditions (except mental health disorder diagnoses or disorders directly related to mental health or depression). The LASSO-predicted value was used to estimate a covariate-adjusted effect for all other candidate variables.

1  
2  
3  
4 BMI, body mass index; LASSO, least absolute shrinkage and selection operator; PHQ-9, Patient  
5  
6 Health Questionnaire-9  
7  
8  
9

10 **Figure 4. Top 30 Factors Associated with PHQ-9 Score Adjusted by Age, Sex, Age by Sex**  
11 **Interaction, Race, Ethnicity, Socioeconomic Status, Health Behaviors, Medical Conditions,**  
12 **Symptoms, and Allergies**  
13  
14

15  
16 LASSO regression model 4 comprised age, sex, age by sex interaction, race, ethnicity,  
17  
18 socioeconomic status, health behaviors, medical conditions (except mental health disorder  
19  
20 diagnoses or disorders directly related to mental health or depression), symptoms (except those  
21  
22 that are directly related to mental health or depression), and allergies. The LASSO-predicted  
23  
24 value was used to estimate a covariate-adjusted effect for all other candidate variables.  
25  
26

27  
28 ALT, alanine aminotransferase; AST, aspartate aminotransferase; BMI, body mass index;  
29  
30 HbA1c, hemoglobin A1c; LASSO, least absolute shrinkage and selection operator; MCH, mean  
31  
32 corpuscular hemoglobin; MCHC, mean corpuscular hemoglobin concentration; PHQ-9, Patient  
33  
34 Health Questionnaire-9; RBC, red blood cell; WBC, white blood cell  
35  
36  
37  
38  
39

40 **Figure 5. Top 30 Factors Associated with PHQ-9 Score Adjusted by Age, Sex, Age by Sex**  
41 **Interaction, Race, Ethnicity, Socioeconomic Status, Health Behaviors, Medical Conditions,**  
42 **Symptoms, Allergies, and Physical Function**  
43  
44

45  
46 LASSO regression model 5 comprised age, sex, age by sex interaction, race, ethnicity,  
47  
48 socioeconomic status, health behaviors, medical conditions (except mental health disorder  
49  
50 diagnoses or disorders directly related to mental health or depression), symptoms (except those  
51  
52 that are directly related to mental health or depression), allergies, and physical function. The  
53  
54  
55  
56  
57  
58  
59

1  
2  
3  
4 LASSO-predicted value was used to estimate a covariate-adjusted effect for all other candidate  
5  
6 variables.

7  
8 ALT, alanine aminotransferase; AST, aspartate aminotransferase; GFR, glomerular filtration  
9  
10 rate; HbA1c, hemoglobin A1c; HDL, high density lipoprotein; LASSO, least absolute shrinkage  
11  
12 and selection operator; LDL, low density lipoprotein; MCH, mean corpuscular hemoglobin;  
13  
14 MCHC, mean corpuscular hemoglobin concentration; MCV, mean corpuscular volume; MDRD,  
15  
16 modification of diet in renal disease; MPV, mean platelet volume; pH, potential hydrogen; PHQ-  
17  
18 9, Patient Health Questionnaire-9; RBC, red blood cell; TSH, thyroid-stimulating hormone;  
19  
20  
21  
22 WBC, white blood cell  
23  
24  
25  
26  
27  
28  
29  
30  
31  
32  
33  
34  
35  
36  
37  
38  
39  
40  
41  
42  
43  
44  
45  
46  
47  
48  
49  
50  
51  
52  
53  
54  
55  
56  
57  
58  
59  
60

1  
2  
3  
4  
5  
6  
7  
8  
9  
10  
11  
12  
13  
14  
15  
16  
17  
18  
19  
20  
21  
22  
23  
24  
25  
26  
27  
28  
29  
30  
31  
32  
33  
34  
35  
36  
37  
38  
39  
40  
41  
42  
43  
44  
45  
46  
47  
48  
49  
50  
51  
52  
53  
54  
55  
56  
57  
58  
59  
60

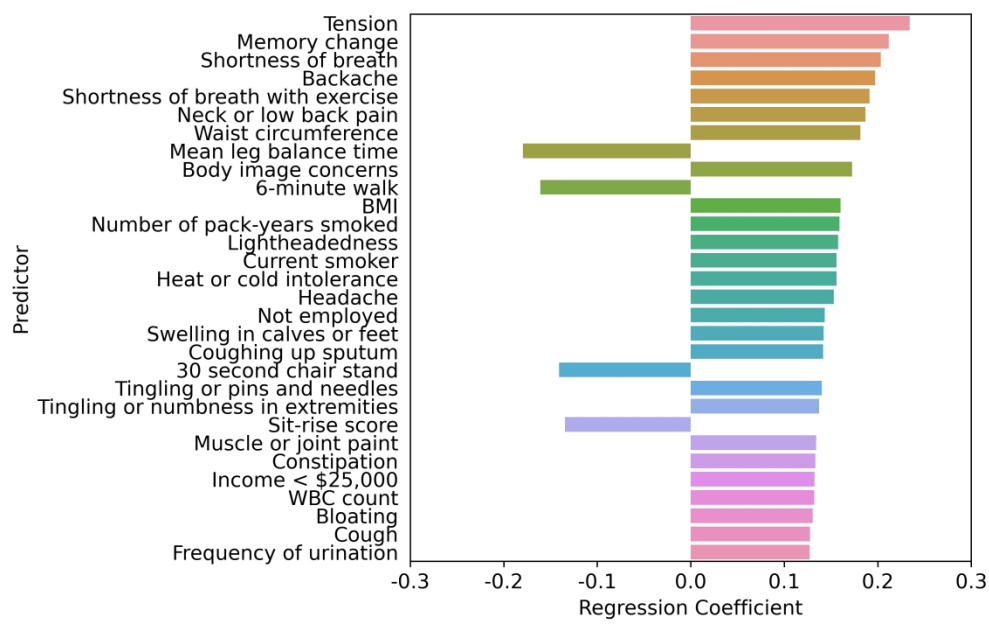

535x336mm (177 x 177 DPI)

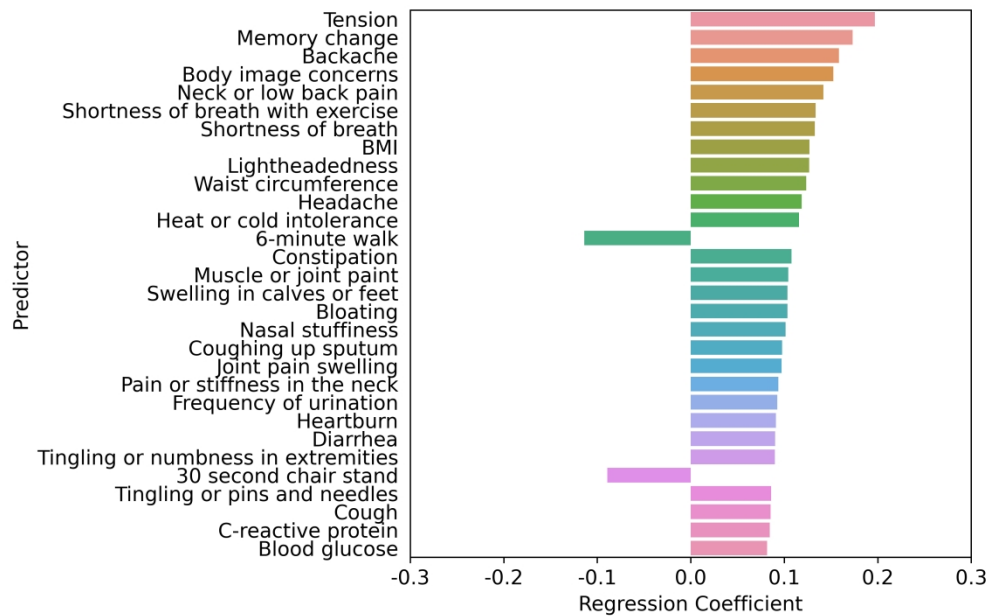

535x336mm (177 x 177 DPI)

1  
2  
3  
4  
5  
6  
7  
8  
9  
10  
11  
12  
13  
14  
15  
16  
17  
18  
19  
20  
21  
22  
23  
24  
25  
26  
27  
28  
29  
30  
31  
32  
33  
34  
35  
36  
37  
38  
39  
40  
41  
42  
43  
44  
45  
46  
47  
48  
49  
50  
51  
52  
53  
54  
55  
56  
57  
58  
59  
60

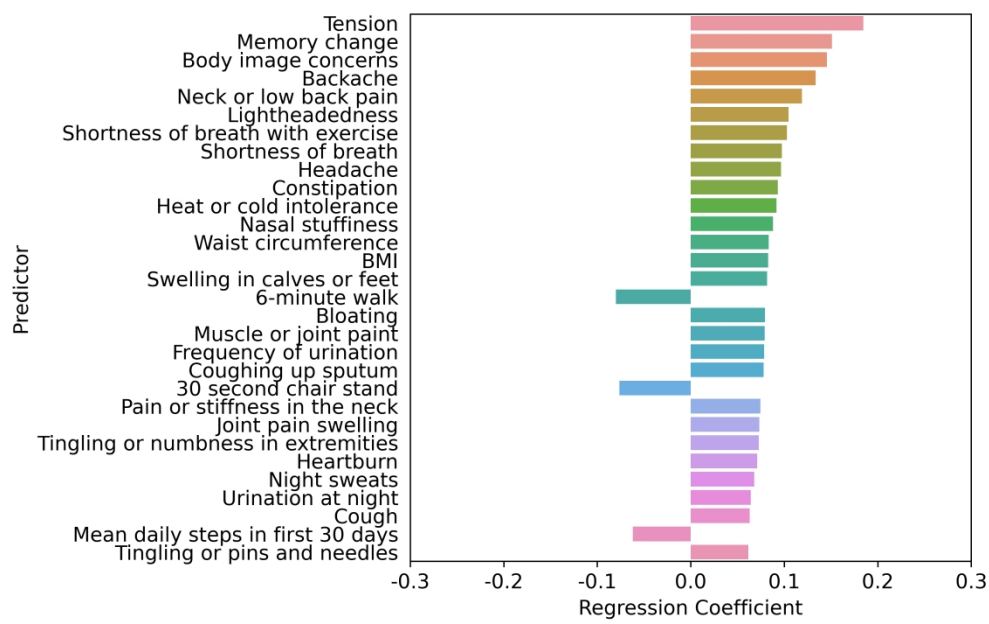

535x336mm (177 x 177 DPI)



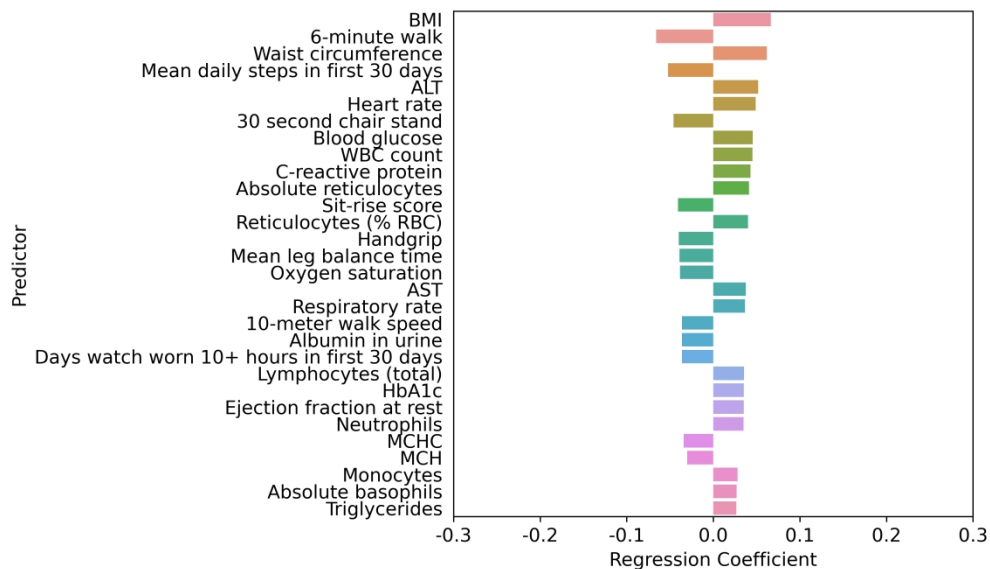

578x336mm (177 x 177 DPI)

1  
2  
3  
4  
5  
6  
7  
8  
9  
10  
11  
12  
13  
14  
15  
16  
17  
18  
19  
20  
21  
22  
23  
24  
25  
26  
27  
28  
29  
30  
31  
32  
33  
34  
35  
36  
37  
38  
39  
40  
41  
42  
43  
44  
45  
46  
47  
48  
49  
50  
51  
52  
53  
54  
55  
56  
57  
58  
59  
60

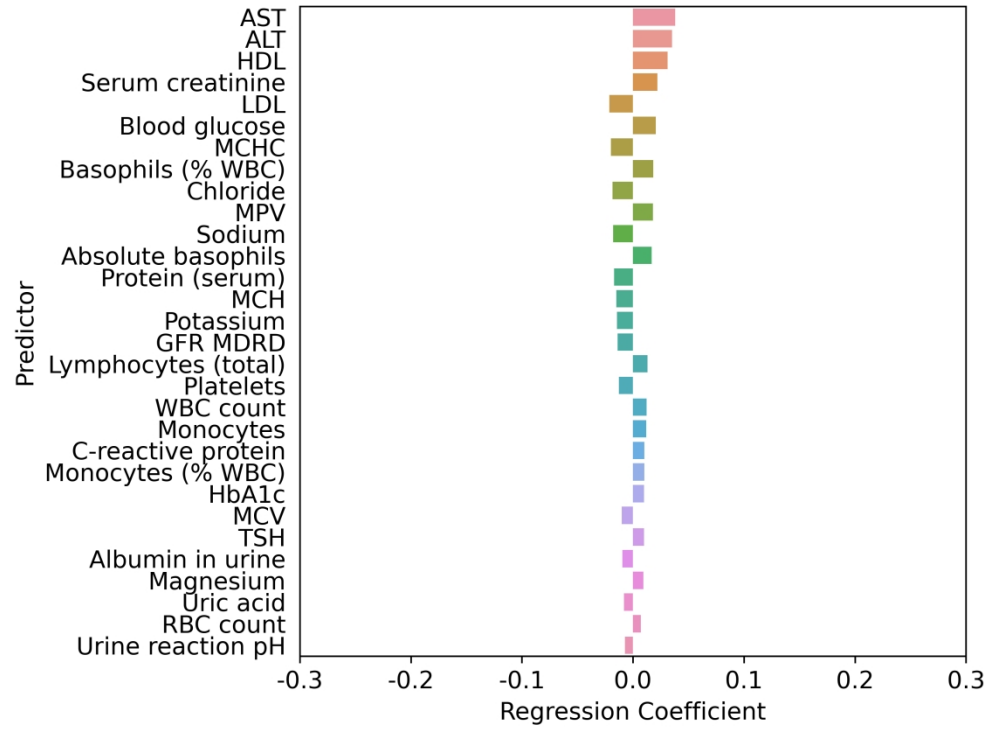

450x336mm (177 x 177 DPI)

## SUPPLEMENTAL MATERIAL

|    |                                                                                         |    |
|----|-----------------------------------------------------------------------------------------|----|
| 1  |                                                                                         |    |
| 2  |                                                                                         |    |
| 3  |                                                                                         |    |
| 4  |                                                                                         |    |
| 5  |                                                                                         |    |
| 6  | <b>eTable 1. Key Variables Included in Each LASSO Covariate Model</b>                   | 2  |
| 7  | <b>eTable 2. Additional Medical History: PHQ-9 Scores</b>                               | 3  |
| 8  | <b>eTable 3. Estimates of the Non-Zero Coefficients from LASSO Model 1</b>              | 5  |
| 9  | <b>eTable 4. Estimates of the Non-Zero Coefficients from LASSO Model 2</b>              | 6  |
| 10 | <b>eTable 5. Estimates of the Non-Zero Coefficients from LASSO Model 3</b>              | 7  |
| 11 | <b>eTable 6. Estimates of the Non-Zero Coefficients from LASSO Model 4</b>              | 9  |
| 12 | <b>eTable 7. Estimates of the Non-Zero Coefficients from LASSO Model 5</b>              | 11 |
| 13 | <b>eTable 8. LASSO Regression Results: Model 1</b>                                      | 13 |
| 14 | <b>eTable 9. LASSO Regression Results: Model 2</b>                                      | 20 |
| 15 | <b>eTable 10. LASSO Regression Results: Model 3</b>                                     | 26 |
| 16 | <b>eTable 11. LASSO Regression Results: Model 4</b>                                     | 31 |
| 17 | <b>eTable 12. LASSO Regression Results: Model 5</b>                                     | 34 |
| 18 | <b>eFigure 1. Distribution of PHQ-9 Score across Risk Groups by Asthma</b>              | 36 |
| 19 | <b>eFigure 2. Distribution of PHQ-9 Score across Risk Groups by Backache</b>            | 37 |
| 20 | <b>eFigure 3. Distribution of PHQ-9 Score across Risk Groups by Memory Change</b>       | 38 |
| 21 | <b>eFigure 4. Distribution of PHQ-9 Score across Risk Groups by Body Image Concerns</b> | 39 |
| 22 | <b>eFigure 5. Distribution of PHQ-9 Score across Risk Groups by Sleep Apnea</b>         | 40 |
| 23 |                                                                                         |    |
| 24 |                                                                                         |    |
| 25 |                                                                                         |    |
| 26 |                                                                                         |    |
| 27 |                                                                                         |    |
| 28 |                                                                                         |    |
| 29 |                                                                                         |    |
| 30 |                                                                                         |    |
| 31 |                                                                                         |    |
| 32 |                                                                                         |    |
| 33 |                                                                                         |    |
| 34 |                                                                                         |    |
| 35 |                                                                                         |    |
| 36 |                                                                                         |    |
| 37 |                                                                                         |    |
| 38 |                                                                                         |    |
| 39 |                                                                                         |    |
| 40 |                                                                                         |    |
| 41 |                                                                                         |    |
| 42 |                                                                                         |    |
| 43 |                                                                                         |    |
| 44 |                                                                                         |    |
| 45 |                                                                                         |    |
| 46 |                                                                                         |    |
| 47 |                                                                                         |    |
| 48 |                                                                                         |    |
| 49 |                                                                                         |    |
| 50 |                                                                                         |    |
| 51 |                                                                                         |    |
| 52 |                                                                                         |    |
| 53 |                                                                                         |    |
| 54 |                                                                                         |    |
| 55 |                                                                                         |    |
| 56 |                                                                                         |    |
| 57 |                                                                                         |    |
| 58 |                                                                                         |    |
| 59 |                                                                                         |    |
| 60 |                                                                                         |    |

**eTable 1. Key Variables Included in Each LASSO Covariate Model**

| Variables                                                               | Model 1 | Model 2 | Model 3 | Model 4 | Model 5 |
|-------------------------------------------------------------------------|---------|---------|---------|---------|---------|
| Age, sex and age x sex interaction                                      | ✓       | ✓       | ✓       | ✓       | ✓       |
| Race and ethnicity                                                      |         | ✓       | ✓       | ✓       | ✓       |
| Socioeconomic-related variables                                         |         | ✓       | ✓       | ✓       | ✓       |
| Behavioral-related behaviors                                            |         | ✓       | ✓       | ✓       | ✓       |
| Medical conditions <i>not</i> related to mental health / depression     |         |         | ✓       | ✓       | ✓       |
| Symptoms and allergies <i>not</i> related to mental health / depression |         |         |         | ✓       | ✓       |
| Physical health metrics                                                 |         |         |         |         | ✓       |
| Standard labs                                                           |         |         |         |         |         |

**eTable 2. Additional Medical History: PHQ-9 Scores**

|                                  | 0<br>(N=484) | 1–4<br>(N=1086) | 5–9<br>(N=518) | 10–14<br>(N=184) | 15+<br>(N=93) |
|----------------------------------|--------------|-----------------|----------------|------------------|---------------|
| Nonmelanoma skin cancer          | 12 (2.5)     | 42 (3.9)        | 18 (3.5)       | 3 (1.6)          | 0 (0.0)*      |
| Osteoporosis                     | 11 (2.3)     | 47 (4.3)        | 17 (3.3)       | 3 (1.6)          | 0 (0.0)*      |
| Benign prostatic hyperplasia     | 22 (4.5)     | 44 (4.1)        | 17 (3.3)       | 3 (1.6)          | 0 (0.0)*      |
| Melanoma skin cancer             | 11 (2.3)     | 23 (2.1)        | 5 (1.0)        | 0 (0.0)          | 0 (0.0)*      |
| Prostate cancer                  | 12 (2.5)     | 17 (1.6)        | 6 (1.2)        | 1 (0.5)          | 0 (0.0)*      |
| Diabetes type 1                  | 3 (0.6)      | 12 (1.1)        | 4 (0.8)        | 3 (1.6)          | 0 (0.0)       |
| Macular degeneration             | 2 (0.4)      | 20 (1.8)        | 4 (0.8)        | 4 (2.2)          | 0 (0.0)       |
| TIA                              | 7 (1.4)      | 9 (0.8)         | 3 (0.6)        | 3 (1.6)          | 0 (0.0)       |
| Hepatitis B                      | 6 (1.2)      | 10 (0.9)        | 4 (0.8)        | 3 (1.6)          | 0 (0.0)       |
| Coronary artery disease          | 11 (2.3)     | 44 (4.1)        | 13 (2.5)       | 6 (3.3)          | 1 (1.1)       |
| Hashimoto's disease              | 8 (1.7)      | 22 (2.0)        | 11 (2.1)       | 3 (1.6)          | 1 (1.1)       |
| Goiter                           | 7 (1.4)      | 12 (1.1)        | 3 (0.6)        | 0 (0.0)          | 1 (1.1)       |
| Hemorrhoids                      | 11 (2.3)     | 44 (4.1)        | 18 (3.5)       | 4 (2.2)          | 1 (1.1)       |
| Hypothyroidism                   | 42 (8.7)     | 93 (8.6)        | 40 (7.7)       | 9 (4.9)          | 2 (2.2)       |
| Glaucoma                         | 14 (2.9)     | 29 (2.7)        | 10 (1.9)       | 6 (3.3)          | 2 (2.2)       |
| Psoriasis                        | 10 (2.1)     | 16 (1.5)        | 11 (2.1)       | 8 (4.3)          | 2 (2.2)       |
| Peptic ulcer                     | 5 (1.0)      | 22 (2.0)        | 13 (2.5)       | 4 (2.2)          | 2 (2.2)       |
| Diverticulosis                   | 8 (1.7)      | 29 (2.7)        | 10 (1.9)       | 5 (2.7)          | 2 (2.2)       |
| Peripheral vascular disorder     | 1 (0.2)      | 15 (1.4)        | 8 (1.5)        | 2 (1.1)          | 2 (2.2)       |
| Atrial fibrillation              | 4 (0.8)      | 17 (1.6)        | 1 (0.2)        | 1 (0.5)          | 2 (2.2)       |
| Colon polyps                     | 53 (11.0)    | 113 (10.4)      | 52 (10.0)      | 12 (6.5)         | 3 (3.2)       |
| Arrhythmia                       | 20 (4.1)     | 69 (6.4)        | 27 (5.2)       | 8 (4.3)          | 3 (3.2)       |
| Tinnitus                         | 31 (6.4)     | 52 (4.8)        | 35 (6.8)       | 6 (3.3)          | 3 (3.2)       |
| Hearing Loss                     | 29 (6.0)     | 75 (6.9)        | 26 (5.0)       | 12 (6.5)         | 3 (3.2)       |
| Gout                             | 14 (2.9)     | 29 (2.7)        | 14 (2.7)       | 5 (2.7)          | 3 (3.2)       |
| Diverticulitis                   | 3 (0.6)      | 20 (1.8)        | 17 (3.3)       | 3 (1.6)          | 3 (3.2)       |
| Headaches                        | 6 (1.2)      | 18 (1.7)        | 13 (2.5)       | 3 (1.6)          | 3 (3.2)       |
| Epilepsy                         | 5 (1.0)      | 19 (1.7)        | 12 (2.3)       | 5 (2.7)          | 3 (3.2)       |
| Breast cancer                    | 8 (1.7)      | 20 (1.8)        | 9 (1.7)        | 1 (0.5)          | 3 (3.2)       |
| Myocardial infarction            | 6 (1.2)      | 19 (1.7)        | 11 (2.1)       | 1 (0.5)          | 3 (3.2)       |
| Osteopenia                       | 22 (4.5)     | 62 (5.7)        | 22 (4.2)       | 1 (0.5)          | 3 (3.2)       |
| Stroke                           | 5 (1.0)      | 12 (1.1)        | 9 (1.7)        | 1 (0.5)          | 3 (3.2)       |
| Drug abuse*                      | 5 (1.0)      | 14 (1.3)        | 5 (1.0)        | 13 (7.1)         | 4 (4.3)       |
| Pulmonary embolism               | 4 (0.8)      | 17 (1.6)        | 7 (1.4)        | 3 (1.6)          | 4 (4.3)       |
| Nonalcoholic fatty liver disease | 5 (1.0)      | 17 (1.6)        | 16 (3.1)       | 3 (1.6)          | 4 (4.3)       |
| Hepatitis C†                     | 5 (1.0)      | 8 (0.7)         | 3 (0.6)        | 8 (4.3)          | 4 (4.3)       |
| Cataracts                        | 61 (12.6)    | 167 (15.4)      | 63 (12.2)      | 16 (8.7)         | 5 (5.4)       |
| Kidney or bladder stones         | 36 (7.4)     | 66 (6.1)        | 18 (3.5)       | 13 (7.1)         | 5 (5.4)       |

1  
2  
3  
4  
5  
6  
7  
8  
9  
10  
11  
12  
13  
14  
15  
16  
17  
18  
19  
20  
21  
22  
23  
24  
25  
26  
27  
28  
29  
30  
31  
32  
33  
34  
35  
36  
37  
38  
39  
40  
41  
42  
43  
44  
45  
46  
47  
48  
49  
50  
51  
52  
53  
54  
55  
56  
57  
58  
59  
60

|                            |            |            |            |           |           |
|----------------------------|------------|------------|------------|-----------|-----------|
| Concussions                | 19 (3.9)   | 62 (5.7)   | 35 (6.8)   | 13 (7.1)  | 5 (5.4)   |
| Rheumatoid arthritis†      | 4 (0.8)    | 13 (1.2)   | 12 (2.3)   | 4 (2.2)   | 6 (6.5)   |
| Gallbladder disorder†      | 18 (3.7)   | 57 (5.2)   | 32 (6.2)   | 14 (7.6)  | 8 (8.6)   |
| Hypercholesterolemia       | 68 (14.0)  | 127 (11.7) | 70 (13.5)  | 19 (10.3) | 9 (9.7)   |
| Irritable bowel disorder†  | 9 (1.9)    | 60 (5.5)   | 34 (6.6)   | 7 (3.8)   | 10 (10.8) |
| Sleep apnea                | 38 (7.9)   | 101 (9.3)  | 63 (12.2)  | 19 (10.3) | 11 (11.8) |
| Diabetes type 2†           | 45 (9.3)   | 109 (10.0) | 62 (12.0)  | 32 (17.4) | 14 (15.1) |
| Pneumonia                  | 30 (6.2)   | 85 (7.8)   | 40 (7.7)   | 12 (6.5)  | 15 (16.1) |
| Osteoarthritis             | 76 (15.7)  | 216 (19.9) | 118 (22.8) | 33 (17.9) | 17 (18.3) |
| Hypertension               | 122 (25.2) | 297 (27.3) | 144 (27.8) | 51 (27.7) | 26 (28.0) |
| Hay fever                  | 26 (5.4)   | 78 (7.2)   | 36 (6.9)   | 19 (10.3) | 3 (3.2)   |
| Discharge†                 | 19 (3.9)   | 64 (5.9)   | 44 (8.5)   | 18 (9.8)  | 8 (8.6)   |
| Hemorrhoids†               | 22 (4.5)   | 69 (6.4)   | 40 (7.7)   | 17 (9.2)  | 9 (9.7)   |
| Ear ringing†               | 38 (7.9)   | 101 (9.3)  | 59 (11.4)  | 23 (12.5) | 13 (14.0) |
| Easy bruising or bleeding† | 39 (8.1)   | 130 (12.0) | 68 (13.1)  | 22 (12.0) | 18 (19.4) |
| Runny nose†                | 70 (14.5)  | 210 (19.3) | 116 (22.4) | 44 (23.9) | 20 (21.5) |
| Floater†                   | 55 (11.4)  | 160 (14.7) | 81 (15.6)  | 28 (15.2) | 21 (22.6) |

Data shown are no. (%), unless otherwise indicated.

P-values for trend were calculated with the use of Spearman Correlation or Cochrane-Armitage tests, where appropriate.

\*P-value for trend <0.0001.

†P-value for trend <0.01.

**eTable 3. Estimates of the Non-Zero Coefficients from LASSO Model 1**

| Variable  | Estimate |
|-----------|----------|
| Age       | -0.152   |
| Age x sex | 0.063    |

LASSO regression model 1 comprised age, sex, and age by sex interaction. Variables with zero estimates are not shown.

For peer review only

**eTable 4. Estimates of the Non-Zero Coefficients from LASSO Model 2**

| Variable                      | Estimate |
|-------------------------------|----------|
| Age                           | -0.167   |
| Current smoker                | 0.103    |
| Not employed                  | 0.096    |
| Black race                    | -0.076   |
| Age x sex                     | 0.074    |
| Former smoker                 | 0.061    |
| Number of pack-years smoked   | 0.058    |
| Income < \$25,000             | 0.057    |
| Asian race                    | -0.042   |
| Uninsured                     | 0.032    |
| Married                       | -0.025   |
| AUDIT-C score                 | -0.012   |
| High school or less education | 0.009    |
| Other race                    | 0.005    |
| Hispanic ethnicity            | 0.003    |

LASSO regression model 2 comprised age, sex, age by sex interaction, race, ethnicity, socioeconomic status and health behaviors.

Variables with zero estimates are not shown.

AUDIT-C, Alcohol Use Disorders Identification Test-Concise; LASSO, least absolute shrinkage and selection operator.



**eTable 5. Estimates of the Non-Zero Coefficients from LASSO Model 3**

| Variable                         | Estimate |
|----------------------------------|----------|
| Age                              | -0.194   |
| Current smoker                   | 0.106    |
| Not employed                     | 0.065    |
| Former smoker                    | 0.054    |
| Uninsured                        | 0.049    |
| COPD with emphysema              | 0.048    |
| Asthma                           | 0.048    |
| Sleep apnea                      | 0.048    |
| Fibromyalgia                     | 0.038    |
| Married                          | -0.037   |
| GERD                             | 0.036    |
| Age x sex                        | 0.035    |
| Kidney or bladder stones         | -0.032   |
| Osteoarthritis                   | 0.03     |
| Asian race                       | -0.029   |
| Hypertension                     | 0.028    |
| Epilepsy                         | 0.027    |
| Irritable bowel disorder         | 0.025    |
| Diverticulitis                   | 0.024    |
| Pulmonary embolism               | 0.023    |
| Migraines                        | 0.023    |
| Black race                       | -0.02    |
| Chronic headaches                | 0.017    |
| Hepatitis C                      | 0.017    |
| Income < \$25,000                | 0.016    |
| Diabetes type 2                  | 0.015    |
| Cataracts                        | 0.011    |
| Osteoporosis                     | -0.011   |
| Goiter                           | -0.011   |
| Rheumatoid arthritis             | 0.01     |
| Psoriasis                        | 0.01     |
| Nonmelanoma skin cancer          | 0.009    |
| Number of pack-years smoked      | 0.009    |
| Hypothyroidism                   | -0.009   |
| Arrhythmia                       | 0.008    |
| Glaucoma                         | 0.008    |
| Female                           | 0.006    |
| Nonalcoholic fatty liver disease | 0.006    |
| Prostate cancer                  | -0.003   |

Hypercholesterolemia

0.002

LASSO regression model 3 comprised age, sex, age by sex interaction, race, ethnicity, socioeconomic status, health behaviors, and medical conditions (except mental health disorder diagnoses or disorders directly related to mental health or depression). Variables with zero estimates are not shown.

COPD, chronic obstructive pulmonary disease; GERD, gastroesophageal reflux disease; LASSO, least absolute shrinkage and selection operator.

For peer review only

**eTable 6. Estimates of the Non-Zero Coefficients from LASSO Model 4**

| Variable                          | Estimate |
|-----------------------------------|----------|
| Age                               | -0.14    |
| Tension                           | 0.095    |
| Body image concerns               | 0.085    |
| Current smoker                    | 0.071    |
| Not employed                      | 0.06     |
| Memory change                     | 0.059    |
| Uninsured                         | 0.042    |
| Asthma                            | 0.041    |
| Shortness of breath               | 0.039    |
| Backache                          | 0.037    |
| Sleep apnea                       | 0.037    |
| Former smoker                     | 0.035    |
| Lightheadedness                   | 0.034    |
| Kidney or bladder stones          | -0.026   |
| Married                           | -0.025   |
| Neck or low back pain             | 0.022    |
| Black race                        | -0.021   |
| Coughing up sputum                | 0.019    |
| Osteoarthritis                    | 0.019    |
| Headache                          | 0.017    |
| Food allergies                    | 0.016    |
| Diverticulitis                    | 0.015    |
| Cataracts                         | 0.014    |
| Constipation                      | 0.014    |
| Asian race                        | -0.014   |
| Shortness of breath with exercise | 0.012    |
| Hypothyroidism                    | -0.012   |
| Fibromyalgia                      | 0.011    |
| Epilepsy                          | 0.011    |
| GERD                              | 0.011    |
| Migraines                         | 0.011    |
| Joint pain swelling               | 0.009    |
| COPD with emphysema               | 0.009    |
| Heat or cold intolerance          | 0.009    |
| Pulmonary embolism                | 0.009    |
| Bloating                          | 0.009    |
| Diabetes type 2                   | 0.007    |
| Swelling in calves or feet        | 0.007    |
| Irritable bowel disorder          | 0.007    |

1  
2  
3  
4  
5  
6  
7  
8  
9  
10  
11  
12  
13  
14  
15  
16  
17  
18  
19  
20  
21  
22  
23  
24  
25  
26  
27  
28  
29  
30  
31  
32  
33  
34  
35  
36  
37  
38  
39  
40  
41  
42  
43  
44  
45  
46  
47  
48  
49  
50  
51  
52  
53  
54  
55  
56  
57  
58  
59  
60

|                         |        |
|-------------------------|--------|
| Nasal stuffiness        | 0.007  |
| Pneumonia               | 0.004  |
| Nonmelanoma skin cancer | 0.004  |
| Hypertension            | 0.004  |
| Psoriasis               | 0.002  |
| Cough                   | 0.002  |
| Chronic headaches       | 0.002  |
| Hepatitis C             | 0.001  |
| Prostate cancer         | -0.001 |

---

LASSO regression model 4 comprised age, sex, age by sex interaction, race, ethnicity, socioeconomic status, health behaviors, medical conditions (except mental health disorder diagnoses or disorders directly related to mental health or depression), symptoms (except those that are directly related to mental health or depression), and allergies. Variables with zero estimates are not shown. COPD, chronic obstructive pulmonary disease; GERD, gastroesophageal reflux disease; LASSO, least absolute shrinkage and selection operator.

**eTable 7. Estimates of the Non-Zero Coefficients from LASSO Model 5**

| Variable                                   | Estimate |
|--------------------------------------------|----------|
| Age                                        | -0.148   |
| Tension                                    | 0.094    |
| Body image concerns                        | 0.077    |
| Current smoker                             | 0.068    |
| Memory change                              | 0.062    |
| Not employed                               | 0.051    |
| Waist circumference                        | 0.049    |
| Black race                                 | -0.042   |
| Asthma                                     | 0.038    |
| 6-minute walk                              | -0.037   |
| Uninsured                                  | 0.036    |
| Backache                                   | 0.035    |
| Days watch worn 10+ hours in first 30 days | -0.032   |
| Lightheadedness                            | 0.031    |
| BMI                                        | 0.031    |
| Former smoker                              | 0.031    |
| Shortness of breath                        | 0.029    |
| Kidney or bladder stones                   | -0.026   |
| Sleep apnea                                | 0.025    |
| Neck or low back pain                      | 0.022    |
| Coughing up sputum                         | 0.021    |
| Cataracts                                  | 0.02     |
| Mean daily steps in first 30 days          | -0.019   |
| Constipation                               | 0.018    |
| Married                                    | -0.017   |
| Ejection fraction at rest                  | 0.016    |
| Food allergies                             | 0.016    |
| Osteoarthritis                             | 0.015    |
| Heart rate                                 | 0.015    |
| Hypothyroidism                             | -0.015   |
| Coronary calcium score                     | -0.015   |
| Heat or cold intolerance                   | 0.013    |
| Headache                                   | 0.013    |
| Irritable bowel disorder                   | 0.013    |
| Diverticulitis                             | 0.012    |
| Handgrip                                   | -0.012   |
| Bloating                                   | 0.011    |
| Nonmelanoma skin cancer                    | 0.01     |
| Migraines                                  | 0.01     |

1  
2  
3  
4  
5  
6  
7  
8  
9  
10  
11  
12  
13  
14  
15  
16  
17  
18  
19  
20  
21  
22  
23  
24  
25  
26  
27  
28  
29  
30  
31  
32  
33  
34  
35  
36  
37  
38  
39  
40  
41  
42  
43  
44  
45  
46  
47  
48  
49  
50  
51  
52  
53  
54  
55  
56  
57  
58  
59  
60

|                                   |        |
|-----------------------------------|--------|
| Asian race                        | -0.01  |
| AUDIT-C                           | 0.009  |
| Joint pain swelling               | 0.009  |
| Epilepsy                          | 0.009  |
| Pneumonia                         | 0.008  |
| COPD with emphysema               | 0.007  |
| Pulmonary embolism                | 0.007  |
| Respiratory rate                  | 0.007  |
| Gallbladder disease               | -0.007 |
| Nasal stuffiness                  | 0.006  |
| 30 second chair stand             | -0.005 |
| GERD                              | 0.004  |
| Discharge                         | -0.004 |
| Shortness of breath with exercise | 0.002  |
| Fibromyalgia                      | 0.002  |
| Colon polyps                      | 0.002  |
| Arrhythmia                        | 0.001  |
| Goiter                            | -0.001 |

---

LASSO regression model 5 comprised age, sex, age by sex interaction, race, ethnicity, socioeconomic status, health behaviors, medical conditions (except mental health disorder diagnoses or disorders directly related to mental health or depression), symptoms (except those that are directly related to mental health or depression), allergies, and physical function. Variables with zero estimates are not shown.

AUDIT-C, Alcohol Use Disorders Identification Test-Concise; BMI, body mass index; COPD, chronic obstructive pulmonary disease; GERD, gastroesophageal reflux disease; LASSO, least absolute shrinkage and selection operator.

**eTable 8. LASSO Regression Results: Model 1**

| Variable                            | Estimate | P-value  | CI 25%  | CI 75%  |
|-------------------------------------|----------|----------|---------|---------|
| Tension                             | 0.2344   | < 0.0001 | 0.2026  | 0.2661  |
| Memory change                       | 0.2119   | < 0.0001 | 0.1801  | 0.2437  |
| Shortness of breath                 | 0.2033   | < 0.0001 | 0.1714  | 0.2352  |
| Backache                            | 0.1974   | < 0.0001 | 0.1655  | 0.2293  |
| Shortness of breath with exercise   | 0.1914   | < 0.0001 | 0.1594  | 0.2233  |
| Neck or low back pain               | 0.1869   | < 0.0001 | 0.1549  | 0.2189  |
| Waist circumference                 | 0.1814   | < 0.0001 | 0.1480  | 0.2149  |
| Mean leg balance time               | -0.1796  | < 0.0001 | -0.2172 | -0.1420 |
| Body image concerns                 | 0.1726   | < 0.0001 | 0.1403  | 0.2049  |
| 6-minute walk                       | -0.1608  | < 0.0001 | -0.1932 | -0.1284 |
| BMI                                 | 0.1604   | < 0.0001 | 0.1282  | 0.1926  |
| Number of pack-years smoked         | 0.1590   | < 0.0001 | 0.1258  | 0.1922  |
| Lightheadedness                     | 0.1576   | < 0.0001 | 0.1254  | 0.1899  |
| Current smoker                      | 0.1561   | < 0.0001 | 0.1238  | 0.1884  |
| Heat or cold intolerance            | 0.1560   | < 0.0001 | 0.1238  | 0.1882  |
| Headache                            | 0.1532   | < 0.0001 | 0.1205  | 0.1859  |
| Not employed                        | 0.1434   | < 0.0001 | 0.1111  | 0.1757  |
| Swelling in calves or feet          | 0.1421   | < 0.0001 | 0.1098  | 0.1745  |
| Coughing up sputum                  | 0.1416   | < 0.0001 | 0.1093  | 0.1739  |
| 30 second chair stand               | -0.1407  | < 0.0001 | -0.1732 | -0.1081 |
| Tingling or pins and needles        | 0.1403   | < 0.0001 | 0.1079  | 0.1727  |
| Tingling or numbness in extremities | 0.1373   | < 0.0001 | 0.1049  | 0.1697  |
| Sit-rise score                      | -0.1345  | < 0.0001 | -0.1714 | -0.0975 |
| Muscle or joint pain                | 0.1343   | < 0.0001 | 0.1019  | 0.1668  |
| Constipation                        | 0.1334   | < 0.0001 | 0.1010  | 0.1657  |
| Income < \$25,000                   | 0.1325   | < 0.0001 | 0.1001  | 0.1650  |
| WBC count                           | 0.1322   | < 0.0001 | 0.0998  | 0.1647  |
| Bloating                            | 0.1305   | < 0.0001 | 0.0979  | 0.1631  |
| Cough                               | 0.1276   | < 0.0001 | 0.0952  | 0.1601  |
| Frequency of urination              | 0.1274   | < 0.0001 | 0.0945  | 0.1603  |
| Nasal stuffiness                    | 0.1259   | < 0.0001 | 0.0934  | 0.1583  |
| COPD with emphysema                 | 0.1228   | < 0.0001 | 0.0901  | 0.1555  |
| Joint pain swelling                 | 0.1225   | < 0.0001 | 0.0899  | 0.1550  |
| Heartburn                           | 0.1215   | < 0.0001 | 0.0890  | 0.1540  |
| Pain or stiffness in the neck       | 0.1206   | < 0.0001 | 0.0881  | 0.1531  |
| Stiffness                           | 0.1194   | < 0.0001 | 0.0868  | 0.1520  |
| Mean daily steps in first 30 days   | -0.1176  | < 0.0001 | -0.1503 | -0.0848 |
| Heart rate                          | 0.1165   | < 0.0001 | 0.0835  | 0.1495  |
| Urination at night                  | 0.1158   | < 0.0001 | 0.0823  | 0.1492  |
| HbA1c                               | 0.1144   | < 0.0001 | 0.0813  | 0.1476  |
| Diarrhea                            | 0.1138   | < 0.0001 | 0.0812  | 0.1463  |
| 10-meter walk speed                 | -0.1137  | < 0.0001 | -0.1463 | -0.0810 |
| Blood glucose                       | 0.1136   | < 0.0001 | 0.0808  | 0.1463  |
| Oxygen saturation                   | -0.1118  | < 0.0001 | -0.1458 | -0.0777 |
| Dry mouth                           | 0.1117   | < 0.0001 | 0.0791  | 0.1444  |
| Night sweats                        | 0.1110   | < 0.0001 | 0.0784  | 0.1435  |
| C-reactive protein                  | 0.1084   | < 0.0001 | 0.0759  | 0.1409  |
| Urgency                             | 0.1080   | < 0.0001 | 0.0751  | 0.1410  |
| Monocytes                           | 0.1075   | < 0.0001 | 0.0742  | 0.1408  |
| Neutrophils                         | 0.1072   | < 0.0001 | 0.0747  | 0.1398  |
| Numbness or loss of sensation       | 0.1055   | < 0.0001 | 0.0729  | 0.1380  |
| GERD                                | 0.1004   | < 0.0001 | 0.0675  | 0.1334  |

|    |                                    |         |          |         |         |
|----|------------------------------------|---------|----------|---------|---------|
| 1  |                                    |         |          |         |         |
| 2  |                                    |         |          |         |         |
| 3  | Itching skin                       | 0.0971  | < 0.0001 | 0.0645  | 0.1297  |
| 4  | Excessive belching or passing of   |         |          |         |         |
| 5  | gas                                | 0.0957  | < 0.0001 | 0.0631  | 0.1283  |
| 6  | Respiratory rate                   | 0.0944  | < 0.0001 | 0.0618  | 0.1270  |
| 7  | Leg cramps                         | 0.0933  | < 0.0001 | 0.0606  | 0.1260  |
| 8  | Urine specific gravity             | 0.0931  | < 0.0001 | 0.0605  | 0.1257  |
| 9  | Albumin in urine                   | -0.0928 | < 0.0001 | -0.1261 | -0.0595 |
| 10 | Dryness                            | 0.0926  | < 0.0001 | 0.0600  | 0.1252  |
| 11 | Absolute basophils                 | 0.0925  | < 0.0001 | 0.0598  | 0.1251  |
| 12 | Uninsured                          | 0.0924  | < 0.0001 | 0.0597  | 0.1250  |
| 13 | Cramping                           | 0.0920  | < 0.0001 | 0.0592  | 0.1248  |
| 14 | Osteoarthritis                     | 0.0917  | < 0.0001 | 0.0568  | 0.1267  |
| 15 | Lymphocytes (total)                | 0.0883  | < 0.0001 | 0.0554  | 0.1213  |
| 16 | Sleep apnea                        | 0.0877  | < 0.0001 | 0.0541  | 0.1213  |
| 17 | ALT                                | 0.0848  | < 0.0001 | 0.0522  | 0.1175  |
| 18 | Married                            | -0.0848 | < 0.0001 | -0.1188 | -0.0508 |
| 19 | Sinus pain                         | 0.0838  | < 0.0001 | 0.0511  | 0.1164  |
| 20 | HDL                                | -0.0835 | < 0.0001 | -0.1161 | -0.0509 |
| 21 | Creatinine (urine)                 | 0.0811  | < 0.0001 | 0.0484  | 0.1138  |
| 22 | Reticulocytes (% RBC)              | 0.0803  | < 0.0001 | 0.0475  | 0.1131  |
| 23 | Triglycerides                      | 0.0800  | < 0.0001 | 0.0471  | 0.1128  |
| 24 | Fibromyalgia                       | 0.0798  | < 0.0001 | 0.0472  | 0.1125  |
| 25 | Asthma                             | 0.0796  | < 0.0001 | 0.0469  | 0.1123  |
| 26 | Former smoker                      | 0.0791  | < 0.0001 | 0.0454  | 0.1127  |
| 27 | Absolute reticulocytes             | 0.0786  | < 0.0001 | 0.0458  | 0.1114  |
| 28 | Diabetes type 2                    | 0.0780  | < 0.0001 | 0.0448  | 0.1111  |
| 29 | Urine reaction pH                  | -0.0762 | < 0.0001 | -0.1095 | -0.0430 |
| 30 | Migraines                          | 0.0753  | < 0.0001 | 0.0425  | 0.1081  |
| 31 | Hypertension                       | 0.0749  | < 0.0001 | 0.0397  | 0.1102  |
| 32 | Runny nose                         | 0.0738  | < 0.0001 | 0.0411  | 0.1065  |
| 33 | Vitamin D                          | -0.0732 | < 0.0001 | -0.1067 | -0.0397 |
| 34 | Easy bruising or bleeding          | 0.0719  | < 0.0001 | 0.0390  | 0.1049  |
| 35 | High school or less education      | 0.0706  | < 0.0001 | 0.0379  | 0.1033  |
| 36 | Floater                            | 0.0701  | < 0.0001 | 0.0370  | 0.1033  |
| 37 | Discharge                          | 0.0698  | < 0.0001 | 0.0372  | 0.1025  |
| 38 | Ear ringing                        | 0.0671  | < 0.0001 | 0.0338  | 0.1003  |
| 39 | Hemorrhoids (symptom)              | 0.0649  | 0.0001   | 0.0320  | 0.0977  |
| 40 | Days watch worn 10+ hours in first |         |          |         |         |
| 41 | 30 days                            | -0.0639 | 0.0002   | -0.0976 | -0.0301 |
| 42 | Asian race                         | -0.0636 | 0.0002   | -0.0964 | -0.0307 |
| 43 | Absolute eosinophils               | 0.0632  | 0.0002   | 0.0304  | 0.0960  |
| 44 | Seasonal allergies                 | 0.0626  | 0.0002   | 0.0299  | 0.0954  |
| 45 | Medication allergies               | 0.0612  | 0.0003   | 0.0283  | 0.0941  |
| 46 | Irritable bowel disorder           | 0.0585  | 0.0005   | 0.0258  | 0.0912  |
| 47 | Hepatitis C                        | 0.0579  | 0.0005   | 0.0252  | 0.0907  |
| 48 | Rheumatoid arthritis               | 0.0572  | 0.0006   | 0.0244  | 0.0900  |
| 49 | Systolic blood pressure            | 0.0566  | 0.0017   | 0.0212  | 0.0920  |
| 50 | Diverticulitis                     | 0.0561  | 0.0008   | 0.0232  | 0.0890  |
| 51 | Uric acid                          | 0.0538  | 0.0019   | 0.0199  | 0.0876  |
| 52 | Magnesium                          | -0.0537 | 0.0013   | -0.0865 | -0.0209 |
| 53 | MCHC                               | -0.0533 | 0.0015   | -0.0861 | -0.0205 |
| 54 | Handgrip                           | -0.0514 | 0.0021   | -0.0842 | -0.0187 |
| 55 | Gallbladder disease                | 0.0488  | 0.0036   | 0.0160  | 0.0816  |
| 56 | MCH                                | -0.0465 | 0.0065   | -0.0799 | -0.0130 |
| 57 | AST                                | 0.0443  | 0.0080   | 0.0116  | 0.0771  |
| 58 | Epilepsy                           | 0.0427  | 0.0106   | 0.0100  | 0.0755  |
| 59 |                                    |         |          |         |         |
| 60 |                                    |         |          |         |         |



|    |                                  |         |        |         |         |
|----|----------------------------------|---------|--------|---------|---------|
| 1  |                                  |         |        |         |         |
| 2  |                                  |         |        |         |         |
| 3  | Food allergies                   | 0.0424  | 0.0112 | 0.0096  | 0.0752  |
| 4  | Diastolic blood pressure         | 0.0420  | 0.0124 | 0.0091  | 0.0748  |
| 5  | Pneumonia                        | 0.0403  | 0.0163 | 0.0074  | 0.0732  |
| 6  | Nonalcoholic fatty liver disease | 0.0403  | 0.0159 | 0.0075  | 0.0731  |
| 7  | Ejection fraction at rest        | 0.0403  | 0.0161 | 0.0075  | 0.0731  |
| 8  | Non-seasonal allergies           | 0.0393  | 0.0189 | 0.0065  | 0.0722  |
| 9  | Serum creatinine                 | 0.0388  | 0.0239 | 0.0051  | 0.0725  |
| 10 | Protein (serum)                  | -0.0381 | 0.0299 | -0.0725 | -0.0037 |
| 11 | Cataracts                        | 0.0368  | 0.0513 | -0.0002 | 0.0737  |
| 12 | Pulmonary embolism               | 0.0359  | 0.0321 | 0.0031  | 0.0688  |
| 13 | Peripheral vascular disease      | 0.0344  | 0.0401 | 0.0016  | 0.0673  |
| 14 | Hay fever                        | 0.0342  | 0.0413 | 0.0014  | 0.0671  |
| 15 | Stroke                           | 0.0337  | 0.0450 | 0.0008  | 0.0667  |
| 16 | MCV                              | -0.0331 | 0.0529 | -0.0666 | 0.0004  |
| 17 | Diverticulosis                   | 0.0324  | 0.0541 | -0.0006 | 0.0655  |
| 18 | Arrhythmia                       | 0.0324  | 0.0584 | -0.0012 | 0.0659  |
| 19 | Gout                             | 0.0323  | 0.0570 | -0.0010 | 0.0655  |
| 20 | Myocardial infarction            | 0.0317  | 0.0606 | -0.0014 | 0.0649  |
| 21 | Cholesterol                      | -0.0305 | 0.0685 | -0.0633 | 0.0023  |
| 22 | Platelets                        | 0.0303  | 0.0783 | -0.0034 | 0.0640  |
| 23 | LDL                              | -0.0301 | 0.0726 | -0.0630 | 0.0028  |
| 24 | Peptic ulcer                     | 0.0300  | 0.0730 | -0.0028 | 0.0628  |
| 25 | Hypercholesterolemia             | 0.0297  | 0.0879 | -0.0044 | 0.0638  |
| 26 | Goiter                           | -0.0290 | 0.0836 | -0.0618 | 0.0039  |
| 27 | Coronary artery disease          | 0.0287  | 0.0959 | -0.0051 | 0.0625  |
| 28 | Chloride                         | -0.0268 | 0.1096 | -0.0596 | 0.0060  |
| 29 | Neutrophil lymphocyte ratio      | 0.0266  | 0.1156 | -0.0065 | 0.0597  |
| 30 | Basophils (% WBC)                | 0.0258  | 0.1242 | -0.0071 | 0.0587  |
| 31 | Chronic headaches                | 0.0258  | 0.1236 | -0.0070 | 0.0586  |
| 32 | Nonmelanoma skin cancer          | 0.0233  | 0.1738 | -0.0103 | 0.0569  |
| 33 | Hearing loss                     | 0.0229  | 0.1869 | -0.0111 | 0.0568  |
| 34 | MPV                              | 0.0224  | 0.1802 | -0.0104 | 0.0552  |
| 35 | AUDIT-C sum score                | -0.0219 | 0.1897 | -0.0547 | 0.0109  |
| 36 | Benign prostatic hyperplasia     | 0.0218  | 0.2273 | -0.0136 | 0.0571  |
| 37 | Eosinophils (% WBC)              | 0.0216  | 0.2001 | -0.0114 | 0.0545  |
| 38 | Hypothyroidism                   | -0.0213 | 0.2064 | -0.0544 | 0.0118  |
| 39 | Macular degeneration             | 0.0209  | 0.2140 | -0.0121 | 0.0540  |
| 40 | Left ventricular mass index      | 0.0197  | 0.2623 | -0.0147 | 0.0541  |
| 41 | Hemoglobin                       | -0.0181 | 0.2868 | -0.0515 | 0.0153  |
| 42 | RBC count                        | 0.0180  | 0.2814 | -0.0148 | 0.0508  |
| 43 | Psoriasis                        | 0.0170  | 0.3108 | -0.0158 | 0.0497  |
| 44 | Lymphocytes (% WBC)              | -0.0166 | 0.3270 | -0.0499 | 0.0166  |
| 45 | Kidney or bladder stones         | -0.0159 | 0.3448 | -0.0490 | 0.0171  |
| 46 | Glaucoma                         | 0.0157  | 0.3547 | -0.0175 | 0.0489  |
| 47 | Hemorrhoids                      | 0.0152  | 0.3649 | -0.0177 | 0.0482  |
| 48 | Coronary calcium score           | 0.0144  | 0.4287 | -0.0213 | 0.0502  |
| 49 | Other race                       | 0.0131  | 0.4445 | -0.0204 | 0.0466  |
| 50 | Colon polyps                     | 0.0120  | 0.4975 | -0.0227 | 0.0467  |
| 51 | Breast cancer                    | 0.0118  | 0.4826 | -0.0211 | 0.0446  |
| 52 | Melanoma skin cancer             | -0.0117 | 0.4889 | -0.0450 | 0.0215  |
| 53 | Sodium                           | -0.0117 | 0.4856 | -0.0446 | 0.0212  |
| 54 | Calcium                          | -0.0115 | 0.4909 | -0.0443 | 0.0213  |
| 55 | Hashimotos Disease               | -0.0108 | 0.5175 | -0.0436 | 0.0220  |
| 56 | Transient ischemic attack        | -0.0087 | 0.6029 | -0.0417 | 0.0242  |
| 57 | Osteopenia                       | -0.0076 | 0.6521 | -0.0408 | 0.0256  |
| 58 | Atrial fibrillation              | 0.0075  | 0.6601 | -0.0258 | 0.0407  |
| 59 |                                  |         |        |         |         |
| 60 |                                  |         |        |         |         |

1  
2  
3  
4  
5  
6  
7  
8  
9  
10  
11  
12  
13  
14  
15  
16  
17  
18  
19  
20  
21  
22  
23  
24  
25  
26  
27  
28  
29  
30  
31  
32  
33  
34  
35  
36  
37  
38  
39  
40  
41  
42  
43  
44  
45  
46  
47  
48  
49  
50  
51  
52  
53  
54  
55  
56  
57  
58  
59  
60

|                             |         |        |         |        |
|-----------------------------|---------|--------|---------|--------|
| Neutrophil segments (% WBC) | 0.0071  | 0.6714 | -0.0257 | 0.0399 |
| Total neutrophils (% WBC)   | 0.0071  | 0.6714 | -0.0257 | 0.0399 |
| TSH                         | 0.0069  | 0.6786 | -0.0259 | 0.0397 |
| Potassium                   | -0.0060 | 0.7193 | -0.0390 | 0.0269 |
| Hematocrit                  | -0.0049 | 0.7722 | -0.0383 | 0.0285 |
| Monocytes (% WBC)           | 0.0041  | 0.8177 | -0.0305 | 0.0386 |
| Osteoporosis                | -0.0039 | 0.8192 | -0.0369 | 0.0292 |
| GFR MDRD                    | 0.0030  | 0.8737 | -0.0343 | 0.0403 |
| Tinnitus                    | 0.0029  | 0.8627 | -0.0304 | 0.0362 |
| Diabetes type 1             | -0.0027 | 0.8707 | -0.0356 | 0.0301 |
| Hispanic ethnicity          | -0.0023 | 0.8914 | -0.0360 | 0.0314 |
| Hepatitis B                 | -0.0022 | 0.8963 | -0.0351 | 0.0307 |
| Prostate cancer             | -0.0009 | 0.9575 | -0.0348 | 0.0329 |
| Black race                  | 0.0004  | 0.9790 | -0.0325 | 0.0334 |

LASSO regression model 1 comprised age, sex, and age by sex interaction. The LASSO-predicted value was used to estimate a covariate-adjusted effect for all other candidate variables shown.

ALT, alanine aminotransferase; AST, aspartate aminotransferase; AUDIT-C, Alcohol Use Disorders Identification Test-Concise; BMI, body mass index; COPD, chronic obstructive pulmonary disease; GFR, glomerular filtration rate; GERD, gastroesophageal reflux disease; HbA1c, hemoglobin A1c; HDL, high density lipoprotein; LASSO, least absolute shrinkage and selection operator; LDL, low density lipoprotein; MCH, mean corpuscular hemoglobin; MCHC, mean corpuscular hemoglobin concentration; MCV, mean corpuscular volume; MDRD, modification of diet in renal disease; RBC, red blood cells; TSH, thyroid-stimulating hormone; WBC, white blood cells.

**eTable 9. LASSO Regression Results: Model 2**

| Variable                             | Estimate | P-value  | CI 25%  | CI 75%  |
|--------------------------------------|----------|----------|---------|---------|
| Tension                              | 0.1970   | < 0.0001 | 0.1659  | 0.2282  |
| Memory change                        | 0.1732   | < 0.0001 | 0.1423  | 0.2040  |
| Backache                             | 0.1585   | < 0.0001 | 0.1273  | 0.1898  |
| Body image concerns                  | 0.1527   | < 0.0001 | 0.1216  | 0.1837  |
| Neck or low back pain                | 0.1419   | < 0.0001 | 0.1105  | 0.1733  |
| Shortness of breath with exercise    | 0.1336   | < 0.0001 | 0.1019  | 0.1652  |
| Shortness of breath                  | 0.1329   | < 0.0001 | 0.1011  | 0.1646  |
| BMI                                  | 0.1269   | < 0.0001 | 0.0958  | 0.1581  |
| Lightheadedness                      | 0.1268   | < 0.0001 | 0.0955  | 0.1581  |
| Waist circumference                  | 0.1235   | < 0.0001 | 0.0925  | 0.1545  |
| Headache                             | 0.1188   | < 0.0001 | 0.0871  | 0.1505  |
| Heat or cold intolerance             | 0.1159   | < 0.0001 | 0.0845  | 0.1472  |
| 6-minute walk                        | -0.1139  | < 0.0001 | -0.1451 | -0.0827 |
| Constipation                         | 0.1078   | < 0.0001 | 0.0766  | 0.1391  |
| Muscle or joint pain                 | 0.1044   | < 0.0001 | 0.0732  | 0.1356  |
| Swelling in calves or feet           | 0.1036   | < 0.0001 | 0.0723  | 0.1349  |
| Bloating                             | 0.1036   | < 0.0001 | 0.0721  | 0.1351  |
| Nasal stuffiness                     | 0.1014   | < 0.0001 | 0.0702  | 0.1326  |
| Coughing up sputum                   | 0.0978   | < 0.0001 | 0.0663  | 0.1293  |
| Joint pain swelling                  | 0.0971   | < 0.0001 | 0.0659  | 0.1282  |
| Pain or stiffness in the neck        | 0.0937   | < 0.0001 | 0.0623  | 0.1250  |
| Frequency of urination               | 0.0927   | < 0.0001 | 0.0615  | 0.1238  |
| Heartburn                            | 0.0913   | < 0.0001 | 0.0599  | 0.1227  |
| Diarrhea                             | 0.0903   | < 0.0001 | 0.0589  | 0.1216  |
| Tingling or numbness in extremities  | 0.0900   | < 0.0001 | 0.0586  | 0.1214  |
| 30 second chair stand                | -0.0893  | < 0.0001 | -0.1207 | -0.0580 |
| Tingling or pins and needles         | 0.0859   | < 0.0001 | 0.0543  | 0.1176  |
| Cough                                | 0.0855   | < 0.0001 | 0.0539  | 0.1170  |
| C-reactive protein                   | 0.0847   | < 0.0001 | 0.0534  | 0.1161  |
| Blood glucose                        | 0.0819   | < 0.0001 | 0.0506  | 0.1131  |
| Night sweats                         | 0.0811   | < 0.0001 | 0.0497  | 0.1125  |
| Stiffness                            | 0.0806   | < 0.0001 | 0.0492  | 0.1119  |
| Mean leg balance time                | -0.0777  | < 0.0001 | -0.1090 | -0.0464 |
| HbA1c                                | 0.0772   | < 0.0001 | 0.0460  | 0.1084  |
| Heart rate                           | 0.0771   | < 0.0001 | 0.0450  | 0.1092  |
| Urination at night                   | 0.0770   | < 0.0001 | 0.0458  | 0.1082  |
| ALT                                  | 0.0751   | < 0.0001 | 0.0439  | 0.1063  |
| Mean daily steps in first 30 days    | -0.0745  | < 0.0001 | -0.1058 | -0.0432 |
| Urgency                              | 0.0743   | < 0.0001 | 0.0430  | 0.1055  |
| Excessive belching or passing of gas | 0.0739   | < 0.0001 | 0.0426  | 0.1052  |
| GERD                                 | 0.0727   | < 0.0001 | 0.0414  | 0.1039  |
| 10-meter walk speed                  | -0.0721  | < 0.0001 | -0.1035 | -0.0407 |
| Dry mouth                            | 0.0718   | < 0.0001 | 0.0404  | 0.1032  |
| Asthma                               | 0.0715   | < 0.0001 | 0.0403  | 0.1028  |
| Sleep apnea                          | 0.0711   | < 0.0001 | 0.0397  | 0.1024  |
| Itching skin                         | 0.0682   | < 0.0001 | 0.0368  | 0.0997  |
| Sit-rise score                       | -0.0663  | < 0.0001 | -0.0978 | -0.0348 |
| WBC count                            | 0.0653   | < 0.0001 | 0.0327  | 0.0979  |
| MCH                                  | -0.0653  | < 0.0001 | -0.0965 | -0.0340 |
| Sinus pain                           | 0.0652   | < 0.0001 | 0.0338  | 0.0966  |
| Urine specific gravity               | 0.0651   | < 0.0001 | 0.0338  | 0.0965  |

|    |                                               |         |          |         |         |
|----|-----------------------------------------------|---------|----------|---------|---------|
| 1  |                                               |         |          |         |         |
| 2  |                                               |         |          |         |         |
| 3  | Respiratory rate                              | 0.0646  | < 0.0001 | 0.0332  | 0.0960  |
| 4  | Absolute reticulocytes                        | 0.0634  | < 0.0001 | 0.0319  | 0.0948  |
| 5  | Leg cramps                                    | 0.0632  | < 0.0001 | 0.0319  | 0.0945  |
| 6  | Dryness                                       | 0.0622  | 0.0001   | 0.0307  | 0.0937  |
| 7  | Numbness or loss of sensation                 | 0.0615  | 0.0001   | 0.0299  | 0.0930  |
| 8  | Creatinine (urine)                            | 0.0611  | 0.0001   | 0.0297  | 0.0925  |
| 9  | Cramping                                      | 0.0602  | 0.0002   | 0.0284  | 0.0920  |
| 10 | Reticulocytes (% RBC)                         | 0.0601  | 0.0002   | 0.0286  | 0.0916  |
| 11 | Oxygen saturation                             | -0.0597 | 0.0002   | -0.0910 | -0.0284 |
| 12 | Albumin in urine                              | -0.0581 | 0.0003   | -0.0894 | -0.0268 |
| 13 | Migraines                                     | 0.0581  | 0.0003   | 0.0266  | 0.0896  |
| 14 | MCV                                           | -0.0578 | 0.0003   | -0.0891 | -0.0266 |
| 15 | Osteoarthritis                                | 0.0561  | 0.0005   | 0.0247  | 0.0876  |
| 16 | Seasonal allergies                            | 0.0556  | 0.0005   | 0.0243  | 0.0868  |
| 17 | HDL                                           | -0.0534 | 0.0009   | -0.0848 | -0.0220 |
| 18 | Hemorrhoids (symptom)                         | 0.0528  | 0.0009   | 0.0215  | 0.0841  |
| 19 | Fibromyalgia                                  | 0.0525  | 0.0011   | 0.0211  | 0.0840  |
| 20 | Lymphocytes (total)                           | 0.0518  | 0.0015   | 0.0198  | 0.0838  |
| 21 | Runny nose                                    | 0.0515  | 0.0013   | 0.0201  | 0.0828  |
| 22 | Irritable bowel disorder                      | 0.0513  | 0.0013   | 0.0200  | 0.0826  |
| 23 | Ear ringing                                   | 0.0498  | 0.0019   | 0.0184  | 0.0811  |
| 24 | Vitamin D                                     | -0.0497 | 0.0023   | -0.0816 | -0.0178 |
| 25 | Days watch worn 10+ hours in first<br>30 days | -0.0495 | 0.0023   | -0.0813 | -0.0177 |
| 26 | COPD with emphysema                           | 0.0488  | 0.0027   | 0.0170  | 0.0807  |
| 27 | Food allergies                                | 0.0483  | 0.0025   | 0.0170  | 0.0796  |
| 28 | MCHC                                          | -0.0483 | 0.0025   | -0.0797 | -0.0170 |
| 29 | Hypertension                                  | 0.0479  | 0.0030   | 0.0162  | 0.0795  |
| 30 | Urine reaction pH                             | -0.0473 | 0.0031   | -0.0787 | -0.0160 |
| 31 | Triglycerides                                 | 0.0470  | 0.0033   | 0.0156  | 0.0783  |
| 32 | Monocytes                                     | 0.0465  | 0.0037   | 0.0151  | 0.0779  |
| 33 | Neutrophils                                   | 0.0462  | 0.0049   | 0.0140  | 0.0785  |
| 34 | Serum creatinine                              | 0.0460  | 0.0044   | 0.0143  | 0.0777  |
| 35 | Uric acid                                     | 0.0460  | 0.0043   | 0.0144  | 0.0775  |
| 36 | Diabetes type 2                               | 0.0456  | 0.0044   | 0.0143  | 0.0769  |
| 37 | AST                                           | 0.0447  | 0.0052   | 0.0134  | 0.0760  |
| 38 | Discharge                                     | 0.0446  | 0.0054   | 0.0132  | 0.0760  |
| 39 | Non-seasonal allergies                        | 0.0445  | 0.0053   | 0.0132  | 0.0759  |
| 40 | Diverticulitis                                | 0.0432  | 0.0069   | 0.0119  | 0.0745  |
| 41 | Floater                                       | 0.0421  | 0.0084   | 0.0108  | 0.0734  |
| 42 | Absolute basophils                            | 0.0417  | 0.0098   | 0.0101  | 0.0734  |
| 43 | Ejection fraction at rest                     | 0.0415  | 0.0094   | 0.0102  | 0.0729  |
| 44 | Easy bruising or bleeding                     | 0.0354  | 0.0272   | 0.0040  | 0.0667  |
| 45 | Medication allergies                          | 0.0345  | 0.0311   | 0.0031  | 0.0658  |
| 46 | Epilepsy                                      | 0.0318  | 0.0471   | 0.0004  | 0.0631  |
| 47 | Systolic blood pressure                       | 0.0316  | 0.0505   | -0.0001 | 0.0632  |
| 48 | Chloride                                      | -0.0308 | 0.0544   | -0.0621 | 0.0006  |
| 49 | Nonalcoholic fatty liver disease              | 0.0303  | 0.0578   | -0.0010 | 0.0617  |
| 50 | Arrhythmia                                    | 0.0299  | 0.0629   | -0.0016 | 0.0614  |
| 51 | RBC count                                     | 0.0296  | 0.0641   | -0.0017 | 0.0610  |
| 52 | Kidney or bladder stones                      | -0.0288 | 0.0721   | -0.0601 | 0.0026  |
| 53 | Chronic headaches                             | 0.0285  | 0.0746   | -0.0028 | 0.0599  |
| 54 | Rheumatoid arthritis                          | 0.0280  | 0.0808   | -0.0034 | 0.0594  |
| 55 | Hay fever                                     | 0.0279  | 0.0815   | -0.0035 | 0.0592  |
| 56 | Benign prostatic hyperplasia                  | 0.0274  | 0.0946   | -0.0047 | 0.0596  |
| 57 | Cholesterol                                   | -0.0267 | 0.0947   | -0.0581 | 0.0046  |
| 58 |                                               |         |          |         |         |
| 59 |                                               |         |          |         |         |
| 60 |                                               |         |          |         |         |

|    |                             |         |        |         |        |
|----|-----------------------------|---------|--------|---------|--------|
| 1  |                             |         |        |         |        |
| 2  |                             |         |        |         |        |
| 3  | Absolute eosinophils        | 0.0265  | 0.0983 | -0.0049 | 0.0580 |
| 4  | Diverticulosis              | 0.0262  | 0.1013 | -0.0051 | 0.0576 |
| 5  | Goiter                      | -0.0261 | 0.1034 | -0.0574 | 0.0053 |
| 6  | Magnesium                   | -0.0258 | 0.1099 | -0.0574 | 0.0058 |
| 7  | Gout                        | 0.0255  | 0.1116 | -0.0059 | 0.0569 |
| 8  | LDL                         | -0.0246 | 0.1238 | -0.0560 | 0.0067 |
| 9  | Hepatitis C                 | 0.0239  | 0.1373 | -0.0076 | 0.0554 |
| 10 | Diastolic blood pressure    | 0.0232  | 0.1467 | -0.0081 | 0.0546 |
| 11 | Peripheral vascular disease | 0.0230  | 0.1508 | -0.0084 | 0.0543 |
| 12 | Hypercholesterolemia        | 0.0227  | 0.1598 | -0.0089 | 0.0543 |
| 13 | Hemoglobin                  | -0.0225 | 0.1601 | -0.0540 | 0.0089 |
| 14 | Nonmelanoma skin cancer     | 0.0212  | 0.1869 | -0.0103 | 0.0528 |
| 15 | MPV                         | 0.0211  | 0.1861 | -0.0102 | 0.0525 |
| 16 | Hearing loss                | 0.0210  | 0.1924 | -0.0106 | 0.0527 |
| 17 | Hypothyroidism              | -0.0209 | 0.1930 | -0.0523 | 0.0106 |
| 18 | Handgrip                    | -0.0205 | 0.2025 | -0.0522 | 0.0111 |
| 19 | Pulmonary embolism          | 0.0194  | 0.2246 | -0.0119 | 0.0508 |
| 20 | Cataracts                   | 0.0186  | 0.2549 | -0.0134 | 0.0507 |
| 21 | Glaucoma                    | 0.0186  | 0.2477 | -0.0129 | 0.0501 |
| 22 | Sodium                      | -0.0167 | 0.2976 | -0.0480 | 0.0147 |
| 23 | Pneumonia                   | 0.0166  | 0.3007 | -0.0148 | 0.0479 |
| 24 | Potassium                   | -0.0153 | 0.3403 | -0.0466 | 0.0161 |
| 25 | Macular degeneration        | 0.0140  | 0.3806 | -0.0173 | 0.0454 |
| 26 | Protein (serum)             | -0.0139 | 0.3870 | -0.0454 | 0.0176 |
| 27 | Stroke                      | 0.0133  | 0.4058 | -0.0181 | 0.0447 |
| 28 | Hemorrhoids                 | 0.0132  | 0.4094 | -0.0182 | 0.0446 |
| 29 | Coronary artery disease     | 0.0123  | 0.4424 | -0.0191 | 0.0438 |
| 30 | Basophils (% WBC)           | 0.0118  | 0.4593 | -0.0195 | 0.0432 |
| 31 | Hematocrit                  | -0.0117 | 0.4667 | -0.0431 | 0.0198 |
| 32 | Psoriasis                   | 0.0109  | 0.4946 | -0.0204 | 0.0423 |
| 33 | Myocardial infarction       | 0.0104  | 0.5153 | -0.0210 | 0.0418 |
| 34 | Eosinophils (% WBC)         | 0.0104  | 0.5158 | -0.0210 | 0.0418 |
| 35 | Peptic ulcer                | 0.0102  | 0.5244 | -0.0212 | 0.0416 |
| 36 | Breast cancer               | 0.0101  | 0.5287 | -0.0213 | 0.0414 |
| 37 | Neutrophil lymphocyte ratio | 0.0100  | 0.5337 | -0.0214 | 0.0413 |
| 38 | Melanoma skin cancer        | -0.0099 | 0.5384 | -0.0414 | 0.0216 |
| 39 | Calcium                     | -0.0098 | 0.5396 | -0.0412 | 0.0215 |
| 40 | Transient ischemic attack   | -0.0090 | 0.5746 | -0.0404 | 0.0224 |
| 41 | Coronary calcium score      | -0.0085 | 0.6007 | -0.0401 | 0.0232 |
| 42 | Left ventricular mass index | 0.0082  | 0.6113 | -0.0234 | 0.0398 |
| 43 | Gallbladder disease         | 0.0081  | 0.6131 | -0.0234 | 0.0397 |
| 44 | TSH                         | 0.0081  | 0.6117 | -0.0232 | 0.0395 |
| 45 | Tinnitus                    | 0.0081  | 0.6138 | -0.0234 | 0.0397 |
| 46 | Osteoporosis                | -0.0081 | 0.6139 | -0.0395 | 0.0233 |
| 47 | GFR MDRD                    | 0.0075  | 0.6465 | -0.0247 | 0.0398 |
| 48 | Colon polyps                | 0.0074  | 0.6490 | -0.0244 | 0.0391 |
| 49 | Hashimotos Disease          | -0.0073 | 0.6467 | -0.0387 | 0.0240 |
| 50 | Neutrophil segments (% WBC) | -0.0072 | 0.6530 | -0.0386 | 0.0242 |
| 51 | Total neutrophils (% WBC)   | -0.0072 | 0.6530 | -0.0386 | 0.0242 |
| 52 | Platelets                   | 0.0059  | 0.7162 | -0.0261 | 0.0380 |
| 53 | Atrial fibrillation         | 0.0056  | 0.7273 | -0.0259 | 0.0371 |
| 54 | Osteopenia                  | -0.0046 | 0.7748 | -0.0361 | 0.0269 |
| 55 | Diabetes type 1             | 0.0039  | 0.8093 | -0.0275 | 0.0352 |
| 56 | Lymphocytes (% WBC)         | 0.0038  | 0.8133 | -0.0276 | 0.0351 |
| 57 | Hepatitis B                 | 0.0030  | 0.8507 | -0.0284 | 0.0344 |
| 58 | Monocytes (% WBC)           | 0.0030  | 0.8543 | -0.0288 | 0.0348 |
| 59 |                             |         |        |         |        |
| 60 |                             |         |        |         |        |

1  
2  
3 Prostate cancer 0.0030 0.8543 -0.0287 0.0347

4 LASSO regression model 2 comprised age, sex, age by sex interaction, race, ethnicity, socioeconomic status and health behaviors.  
5 The LASSO-predicted value was used to estimate a covariate-adjusted effect for all other candidate variables shown.

6 ALT, alanine aminotransferase; AST, aspartate aminotransferase; BMI, body mass index; COPD, chronic obstructive pulmonary  
7 disease; GFR, glomerular filtration rate; GERD, gastroesophageal reflux disease; HbA1c, hemoglobin A1c; HDL, high density  
8 lipoprotein; LASSO, least absolute shrinkage and selection operator; LDL, low density lipoprotein; MCH, mean corpuscular  
9 hemoglobin; MCHC, mean corpuscular hemoglobin concentration; MCV, mean corpuscular volume; MDRD, modification of diet in  
renal disease; RBC, red blood cells; TSH, thyroid-stimulating hormone; WBC, white blood cells.

10  
11  
12  
13  
14  
15  
16  
17  
18  
19  
20  
21  
22  
23  
24  
25  
26  
27  
28  
29  
30  
31  
32  
33  
34  
35  
36  
37  
38  
39  
40  
41  
42  
43  
44  
45  
46  
47  
48  
49  
50  
51  
52  
53  
54  
55  
56  
57  
58  
59  
60

For peer review only

**eTable 10. LASSO Regression Results: Model 3**

| Variable                             | Estimate | P-value  | CI 25%  | CI 75%  |
|--------------------------------------|----------|----------|---------|---------|
| Tension                              | 0.1847   | < 0.0001 | 0.1543  | 0.2152  |
| Memory change                        | 0.1511   | < 0.0001 | 0.1207  | 0.1816  |
| Body image concerns                  | 0.1457   | < 0.0001 | 0.1154  | 0.1760  |
| Backache                             | 0.1336   | < 0.0001 | 0.1026  | 0.1645  |
| Neck or low back pain                | 0.1191   | < 0.0001 | 0.0881  | 0.1501  |
| Lightheadedness                      | 0.1047   | < 0.0001 | 0.0739  | 0.1355  |
| Shortness of breath with exercise    | 0.1028   | < 0.0001 | 0.0713  | 0.1343  |
| Shortness of breath                  | 0.0976   | < 0.0001 | 0.0657  | 0.1294  |
| Headache                             | 0.0967   | < 0.0001 | 0.0655  | 0.1280  |
| Constipation                         | 0.0932   | < 0.0001 | 0.0627  | 0.1238  |
| Heat or cold intolerance             | 0.0918   | < 0.0001 | 0.0609  | 0.1227  |
| Nasal stuffiness                     | 0.0880   | < 0.0001 | 0.0574  | 0.1185  |
| Waist circumference                  | 0.0834   | < 0.0001 | 0.0528  | 0.1141  |
| BMI                                  | 0.0829   | < 0.0001 | 0.0517  | 0.1142  |
| Swelling in calves or feet           | 0.0816   | < 0.0001 | 0.0508  | 0.1124  |
| 6-minute walk                        | -0.0801  | < 0.0001 | -0.1111 | -0.0491 |
| Bloating                             | 0.0795   | < 0.0001 | 0.0484  | 0.1106  |
| Muscle or joint pain                 | 0.0791   | < 0.0001 | 0.0484  | 0.1098  |
| Frequency of urination               | 0.0786   | < 0.0001 | 0.0482  | 0.1091  |
| Coughing up sputum                   | 0.0781   | < 0.0001 | 0.0471  | 0.1090  |
| 30 second chair stand                | -0.0762  | < 0.0001 | -0.1068 | -0.0455 |
| Pain or stiffness in the neck        | 0.0745   | < 0.0001 | 0.0438  | 0.1053  |
| Joint pain swelling                  | 0.0735   | < 0.0001 | 0.0428  | 0.1041  |
| Tingling or numbness in extremities  | 0.0729   | < 0.0001 | 0.0420  | 0.1037  |
| Heartburn                            | 0.0712   | < 0.0001 | 0.0404  | 0.1021  |
| Night sweats                         | 0.0681   | < 0.0001 | 0.0373  | 0.0988  |
| Urination at night                   | 0.0642   | < 0.0001 | 0.0337  | 0.0946  |
| Cough                                | 0.0631   | < 0.0001 | 0.0320  | 0.0941  |
| Mean daily steps in first 30 days    | -0.0620  | < 0.0001 | -0.0926 | -0.0313 |
| Tingling or pins and needles         | 0.0616   | 0.0001   | 0.0304  | 0.0928  |
| Diarrhea                             | 0.0609   | 0.0001   | 0.0298  | 0.0919  |
| C-reactive protein                   | 0.0604   | 0.0001   | 0.0296  | 0.0913  |
| Urgency                              | 0.0601   | 0.0001   | 0.0295  | 0.0906  |
| Blood glucose                        | 0.0594   | 0.0001   | 0.0288  | 0.0901  |
| Stiffness                            | 0.0591   | 0.0002   | 0.0284  | 0.0899  |
| Leg cramps                           | 0.0588   | 0.0002   | 0.0282  | 0.0893  |
| Mean leg balance time                | -0.0565  | 0.0003   | -0.0870 | -0.0260 |
| ALT                                  | 0.0560   | 0.0003   | 0.0254  | 0.0865  |
| Dryness                              | 0.0556   | 0.0004   | 0.0250  | 0.0863  |
| Heart rate                           | 0.0550   | 0.0006   | 0.0234  | 0.0866  |
| Itching skin                         | 0.0548   | 0.0005   | 0.0240  | 0.0856  |
| Excessive belching or passing of gas | 0.0547   | 0.0005   | 0.0240  | 0.0854  |
| Sit-rise score                       | -0.0526  | 0.0008   | -0.0831 | -0.0220 |
| Sinus pain                           | 0.0525   | 0.0008   | 0.0219  | 0.0832  |
| 10-meter walk speed                  | -0.0525  | 0.0008   | -0.0833 | -0.0217 |
| Oxygen saturation                    | -0.0506  | 0.0012   | -0.0811 | -0.0201 |
| HbA1c                                | 0.0499   | 0.0014   | 0.0193  | 0.0805  |
| Respiratory rate                     | 0.0495   | 0.0016   | 0.0187  | 0.0802  |
| Ejection fraction at rest            | 0.0465   | 0.0028   | 0.0160  | 0.0771  |
| WBC count                            | 0.0462   | 0.0045   | 0.0144  | 0.0781  |



|    |                               |         |        |         |         |
|----|-------------------------------|---------|--------|---------|---------|
| 1  |                               |         |        |         |         |
| 2  |                               |         |        |         |         |
| 3  | Absolute reticulocytes        | 0.0462  | 0.0033 | 0.0154  | 0.0770  |
| 4  | Reticulocytes (% RBC)         | 0.0461  | 0.0034 | 0.0153  | 0.0770  |
| 5  | Dry mouth                     | 0.0456  | 0.0038 | 0.0148  | 0.0765  |
| 6  | Albumin in urine              | -0.0456 | 0.0034 | -0.0761 | -0.0151 |
| 7  | Numbness or loss of sensation | 0.0441  | 0.0052 | 0.0132  | 0.0751  |
| 8  | Ear ringing                   | 0.0422  | 0.0068 | 0.0116  | 0.0727  |
| 9  | Food allergies                | 0.0418  | 0.0072 | 0.0113  | 0.0724  |
| 10 | MCH                           | -0.0413 | 0.0084 | -0.0720 | -0.0106 |
| 11 | Runny nose                    | 0.0389  | 0.0128 | 0.0083  | 0.0695  |
| 12 | Cramping                      | 0.0389  | 0.0147 | 0.0076  | 0.0701  |
| 13 | Hemorrhoids (symptom)         | 0.0386  | 0.0134 | 0.0080  | 0.0691  |
| 14 | Days watch worn 10+ hours in  |         |        |         |         |
| 15 | first 30 days                 | -0.0385 | 0.0149 | -0.0696 | -0.0075 |
| 16 | Handgrip                      | -0.0379 | 0.0150 | -0.0685 | -0.0074 |
| 17 | MCHC                          | -0.0378 | 0.0156 | -0.0684 | -0.0072 |
| 18 | Urine specific gravity        | 0.0361  | 0.0222 | 0.0052  | 0.0669  |
| 19 | Absolute basophils            | 0.0352  | 0.0255 | 0.0043  | 0.0660  |
| 20 | Urine reaction pH             | -0.0351 | 0.0243 | -0.0657 | -0.0046 |
| 21 | Monocytes                     | 0.0350  | 0.0253 | 0.0043  | 0.0657  |
| 22 | Lymphocytes (total)           | 0.0350  | 0.0283 | 0.0037  | 0.0663  |
| 23 | Triglycerides                 | 0.0347  | 0.0262 | 0.0041  | 0.0654  |
| 24 | Discharge                     | 0.0345  | 0.0273 | 0.0039  | 0.0652  |
| 25 | MCV                           | -0.0338 | 0.0306 | -0.0645 | -0.0032 |
| 26 | Neutrophils                   | 0.0331  | 0.0390 | 0.0017  | 0.0645  |
| 27 | Floater                       | 0.0330  | 0.0342 | 0.0025  | 0.0636  |
| 28 | Creatinine (urine)            | 0.0325  | 0.0397 | 0.0015  | 0.0635  |
| 29 | AST                           | 0.0319  | 0.0404 | 0.0014  | 0.0625  |
| 30 | Serum creatinine              | 0.0311  | 0.0465 | 0.0005  | 0.0618  |
| 31 | Seasonal allergies            | 0.0288  | 0.0650 | -0.0018 | 0.0595  |
| 32 | Easy bruising or bleeding     | 0.0272  | 0.0821 | -0.0035 | 0.0578  |
| 33 | Vitamin D                     | -0.0269 | 0.0928 | -0.0583 | 0.0045  |
| 34 | Medication allergies          | 0.0258  | 0.0977 | -0.0047 | 0.0564  |
| 35 | Uric acid                     | 0.0247  | 0.1137 | -0.0059 | 0.0552  |
| 36 | Non-seasonal allergies        | 0.0237  | 0.1300 | -0.0070 | 0.0543  |
| 37 | HDL                           | -0.0229 | 0.1470 | -0.0540 | 0.0081  |
| 38 | Hemoglobin                    | -0.0229 | 0.1427 | -0.0535 | 0.0077  |
| 39 | Chloride                      | -0.0219 | 0.1590 | -0.0525 | 0.0086  |
| 40 | Protein (serum)               | -0.0213 | 0.1737 | -0.0520 | 0.0094  |
| 41 | Systolic blood pressure       | 0.0186  | 0.2348 | -0.0121 | 0.0492  |
| 42 | Hay fever                     | 0.0173  | 0.2677 | -0.0133 | 0.0478  |
| 43 | MPV                           | 0.0154  | 0.3227 | -0.0152 | 0.0460  |
| 44 | Absolute eosinophils          | 0.0147  | 0.3473 | -0.0160 | 0.0455  |
| 45 | Hematocrit                    | -0.0147 | 0.3474 | -0.0453 | 0.0159  |
| 46 | Basophils (% WBC)             | 0.0140  | 0.3691 | -0.0166 | 0.0446  |
| 47 | Coronary calcium score        | -0.0118 | 0.4500 | -0.0426 | 0.0189  |
| 48 | RBC count                     | 0.0109  | 0.4830 | -0.0196 | 0.0415  |
| 49 | LDL                           | -0.0105 | 0.5007 | -0.0411 | 0.0201  |
| 50 | GFR MDRD                      | -0.0087 | 0.5884 | -0.0402 | 0.0228  |
| 51 | Diastolic blood pressure      | 0.0087  | 0.5775 | -0.0219 | 0.0393  |
| 52 | Neutrophil lymphocyte ratio   | 0.0079  | 0.6135 | -0.0227 | 0.0384  |
| 53 | Sodium                        | -0.0077 | 0.6218 | -0.0383 | 0.0229  |
| 54 | Calcium                       | -0.0056 | 0.7179 | -0.0362 | 0.0249  |
| 55 | Cholesterol                   | -0.0054 | 0.7296 | -0.0360 | 0.0252  |
| 56 | Monocytes (% WBC)             | 0.0038  | 0.8106 | -0.0271 | 0.0346  |
| 57 | Neutrophil segments (% WBC)   | -0.0035 | 0.8244 | -0.0340 | 0.0271  |
| 58 | Total neutrophils (% WBC)     | -0.0035 | 0.8244 | -0.0340 | 0.0271  |
| 59 |                               |         |        |         |         |
| 60 |                               |         |        |         |         |



|   |                             |         |        |         |
|---|-----------------------------|---------|--------|---------|
| 1 |                             |         |        |         |
| 2 |                             |         |        |         |
| 3 | Platelets                   | 0.0031  | 0.8456 | -0.0280 |
| 4 | Left ventricular mass index | -0.0026 | 0.8673 | -0.0333 |
| 5 | TSH                         | 0.0025  | 0.8751 | -0.0281 |
| 6 | Eosinophils (% WBC)         | 0.0023  | 0.8824 | -0.0283 |
| 7 | Lymphocytes (% WBC)         | 0.0014  | 0.9280 | -0.0292 |
| 8 | Potassium                   | -0.0008 | 0.9588 | -0.0314 |
| 9 | Magnesium                   | -0.0005 | 0.9745 | -0.0316 |

LASSO regression model 3 comprised age, sex, age by sex interaction, race, ethnicity, socioeconomic status, health behaviors, and medical conditions (except mental health disorder diagnoses or disorders directly related to mental health or depression). The LASSO-predicted value was used to estimate a covariate-adjusted effect for all other candidate variables shown. ALT, alanine aminotransferase; AST, aspartate aminotransferase; BMI, body mass index; GFR, glomerular filtration rate; GERD, gastroesophageal reflux disease; HbA1c, hemoglobin A1c; HDL, high density lipoprotein; LASSO, least absolute shrinkage and selection operator; LDL, low density lipoprotein; MCH, mean corpuscular hemoglobin; MCHC, mean corpuscular hemoglobin concentration; MCV, mean corpuscular volume; MDRD, modification of diet in renal disease; RBC, red blood cells; TSH, thyroid-stimulating hormone; WBC, white blood cells.

For peer review only

**eTable 11. LASSO Regression Results: Model 4**

| Variable                                   | Estimate | P-value  | CI 25%  | CI 75%  |
|--------------------------------------------|----------|----------|---------|---------|
| BMI                                        | 0.0664   | < 0.0001 | 0.0369  | 0.0960  |
| 6-minute walk                              | -0.0661  | < 0.0001 | -0.0955 | -0.0368 |
| Waist circumference                        | 0.0618   | < 0.0001 | 0.0326  | 0.0910  |
| Mean daily steps in first 30 days          | -0.0522  | 0.0004   | -0.0813 | -0.0232 |
| ALT                                        | 0.0520   | 0.0004   | 0.0230  | 0.0809  |
| Heart rate                                 | 0.0491   | 0.0012   | 0.0195  | 0.0787  |
| 30 second chair stand                      | -0.0458  | 0.0023   | -0.0752 | -0.0164 |
| Blood glucose                              | 0.0454   | 0.0022   | 0.0164  | 0.0745  |
| WBC count                                  | 0.0454   | 0.0028   | 0.0157  | 0.0751  |
| C-reactive protein                         | 0.0431   | 0.0040   | 0.0137  | 0.0724  |
| Absolute reticulocytes                     | 0.0413   | 0.0054   | 0.0122  | 0.0705  |
| Sit-rise score                             | -0.0408  | 0.0058   | -0.0697 | -0.0118 |
| Reticulocytes (% RBC)                      | 0.0401   | 0.0071   | 0.0109  | 0.0692  |
| Handgrip                                   | -0.0399  | 0.0070   | -0.0688 | -0.0109 |
| Mean leg balance time                      | -0.0390  | 0.0083   | -0.0679 | -0.0100 |
| Oxygen saturation                          | -0.0385  | 0.0091   | -0.0675 | -0.0096 |
| AST                                        | 0.0374   | 0.0112   | 0.0085  | 0.0663  |
| Respiratory rate                           | 0.0367   | 0.0138   | 0.0075  | 0.0659  |
| 10-meter walk speed                        | -0.0362  | 0.0154   | -0.0654 | -0.0069 |
| Albumin in urine                           | -0.0361  | 0.0146   | -0.0651 | -0.0071 |
| Days watch worn 10+ hours in first 30 days | -0.0360  | 0.0157   | -0.0653 | -0.0068 |
| Lymphocytes (total)                        | 0.0354   | 0.0181   | 0.0060  | 0.0648  |
| HbA1c                                      | 0.0352   | 0.0177   | 0.0061  | 0.0643  |
| Ejection fraction at rest                  | 0.0351   | 0.0173   | 0.0062  | 0.0641  |
| Neutrophils                                | 0.0350   | 0.0200   | 0.0055  | 0.0644  |
| MCHC                                       | -0.0341  | 0.0212   | -0.0631 | -0.0051 |
| MCH                                        | -0.0301  | 0.0428   | -0.0592 | -0.0010 |
| Monocytes                                  | 0.0282   | 0.0577   | -0.0009 | 0.0572  |
| Absolute basophils                         | 0.0270   | 0.0702   | -0.0022 | 0.0562  |
| Triglycerides                              | 0.0267   | 0.0716   | -0.0023 | 0.0557  |
| Urine reaction pH                          | -0.0265  | 0.0734   | -0.0554 | 0.0025  |
| MCV                                        | -0.0223  | 0.1333   | -0.0513 | 0.0068  |
| Sodium                                     | -0.0220  | 0.1359   | -0.0510 | 0.0069  |
| Chloride                                   | -0.0211  | 0.1537   | -0.0500 | 0.0079  |
| Serum creatinine                           | 0.0203   | 0.1701   | -0.0087 | 0.0492  |
| MPV                                        | 0.0189   | 0.2015   | -0.0101 | 0.0478  |
| Potassium                                  | -0.0185  | 0.2097   | -0.0475 | 0.0104  |
| Urine specific gravity                     | 0.0179   | 0.2308   | -0.0114 | 0.0473  |
| Vitamin D                                  | -0.0166  | 0.2713   | -0.0462 | 0.0130  |
| Systolic blood pressure                    | 0.0165   | 0.2654   | -0.0125 | 0.0455  |
| LDL                                        | -0.0158  | 0.2837   | -0.0448 | 0.0131  |
| Protein (serum)                            | -0.0145  | 0.3256   | -0.0435 | 0.0145  |
| RBC count                                  | 0.0144   | 0.3285   | -0.0145 | 0.0434  |
| Creatinine (urine)                         | 0.0140   | 0.3518   | -0.0154 | 0.0434  |
| Basophils (% WBC)                          | 0.0119   | 0.4208   | -0.0171 | 0.0408  |
| Left ventricular mass index                | -0.0114  | 0.4391   | -0.0404 | 0.0175  |
| Uric acid                                  | 0.0111   | 0.4506   | -0.0178 | 0.0401  |
| Coronary calcium score                     | -0.0108  | 0.4681   | -0.0398 | 0.0183  |
| TSH                                        | 0.0102   | 0.4912   | -0.0188 | 0.0391  |
| Hemoglobin                                 | -0.0095  | 0.5236   | -0.0385 | 0.0196  |
| Magnesium                                  | -0.0074  | 0.6195   | -0.0366 | 0.0218  |

|    |                             |         |        |         |        |
|----|-----------------------------|---------|--------|---------|--------|
| 1  |                             |         |        |         |        |
| 2  |                             |         |        |         |        |
| 3  | Diastolic blood pressure    | 0.0064  | 0.6651 | -0.0226 | 0.0354 |
| 4  | Eosinophils (% WBC)         | -0.0057 | 0.7011 | -0.0346 | 0.0233 |
| 5  | GFR MDRD                    | -0.0054 | 0.7173 | -0.0349 | 0.0241 |
| 6  | Neutrophil lymphocyte ratio | 0.0053  | 0.7185 | -0.0236 | 0.0343 |
| 7  | Calcium                     | -0.0049 | 0.7398 | -0.0339 | 0.0240 |
| 8  | Platelets                   | 0.0039  | 0.7947 | -0.0254 | 0.0331 |
| 9  | Cholesterol                 | -0.0034 | 0.8172 | -0.0324 | 0.0256 |
| 10 | HDL                         | -0.0027 | 0.8565 | -0.0322 | 0.0267 |
| 11 | Monocytes (% WBC)           | 0.0025  | 0.8652 | -0.0266 | 0.0317 |
| 12 | Absolute eosinophils        | 0.0017  | 0.9082 | -0.0274 | 0.0309 |
| 13 | Lymphocytes (% WBC)         | 0.0015  | 0.9192 | -0.0275 | 0.0305 |
| 14 | Neutrophil segments (% WBC) | -0.0013 | 0.9307 | -0.0302 | 0.0277 |
| 15 | Total neutrophils (% WBC)   | -0.0013 | 0.9307 | -0.0302 | 0.0277 |
| 16 | Hematocrit                  | -0.0011 | 0.9413 | -0.0301 | 0.0279 |

LASSO regression model 4 comprised age, sex, age by sex interaction, race, ethnicity, socioeconomic status, health behaviors, medical conditions (except mental health disorder diagnoses or disorders directly related to mental health or depression), symptoms (except those that are directly related to mental health or depression), and allergies. The LASSO-predicted value was used to estimate a covariate-adjusted effect for all other candidate variables shown.

ALT, alanine aminotransferase; AST, aspartate aminotransferase; BMI, body mass index; GFR, glomerular filtration rate; GERD, gastroesophageal reflux disease; HbA1c, hemoglobin A1c; HDL, high density lipoprotein; LASSO, least absolute shrinkage and selection operator; LDL, low density lipoprotein; MCH, mean corpuscular hemoglobin; MCHC, mean corpuscular hemoglobin concentration; MCV, mean corpuscular volume; MDRD, modification of diet in renal disease; RBC, red blood cells; TSH, thyroid-stimulating hormone; WBC, white blood cells.

**eTable 12. LASSO Regression Results: Model 5**

| Variable                       | Estimate | P-value | CI 25%  | CI 75% |
|--------------------------------|----------|---------|---------|--------|
| AST                            | 0.0382   | 0.0087  | 0.0096  | 0.0667 |
| ALT                            | 0.0352   | 0.0162  | 0.0065  | 0.0638 |
| HDL                            | 0.0312   | 0.0383  | 0.0017  | 0.0607 |
| Serum creatinine               | 0.0220   | 0.1313  | -0.0066 | 0.0506 |
| LDL                            | -0.0212  | 0.1460  | -0.0497 | 0.0074 |
| Blood glucose                  | 0.0207   | 0.1606  | -0.0082 | 0.0497 |
| MCHC                           | -0.0199  | 0.1747  | -0.0486 | 0.0088 |
| Basophils (% WBC)              | 0.0183   | 0.2085  | -0.0102 | 0.0469 |
| Chloride                       | -0.0183  | 0.2099  | -0.0468 | 0.0103 |
| MPV                            | 0.0181   | 0.2145  | -0.0105 | 0.0467 |
| Sodium                         | -0.0179  | 0.2203  | -0.0464 | 0.0107 |
| Absolute basophils             | 0.0170   | 0.2479  | -0.0119 | 0.0460 |
| Protein (serum)                | -0.0169  | 0.2471  | -0.0455 | 0.0117 |
| MCH                            | -0.0148  | 0.3137  | -0.0437 | 0.0140 |
| Potassium                      | -0.0143  | 0.3259  | -0.0429 | 0.0143 |
| GFR MDRD                       | -0.0138  | 0.3535  | -0.0430 | 0.0154 |
| Lymphocytes (total)            | 0.0133   | 0.3748  | -0.0160 | 0.0425 |
| Platelets                      | -0.0127  | 0.3923  | -0.0417 | 0.0164 |
| WBC count                      | 0.0125   | 0.4143  | -0.0175 | 0.0424 |
| Monocytes                      | 0.0121   | 0.4122  | -0.0168 | 0.0409 |
| C-reactive protein             | 0.0104   | 0.4880  | -0.0190 | 0.0398 |
| Monocytes (% WBC)              | 0.0103   | 0.4818  | -0.0185 | 0.0391 |
| HbA1c                          | 0.0101   | 0.4930  | -0.0188 | 0.0391 |
| MCV                            | -0.0101  | 0.4933  | -0.0388 | 0.0187 |
| TSH                            | 0.0100   | 0.4930  | -0.0186 | 0.0386 |
| Albumin in urine               | -0.0096  | 0.5130  | -0.0383 | 0.0192 |
| Magnesium                      | 0.0095   | 0.5205  | -0.0195 | 0.0385 |
| Uric acid                      | -0.0080  | 0.5827  | -0.0366 | 0.0206 |
| RBC count                      | 0.0073   | 0.6161  | -0.0213 | 0.0359 |
| Urine reaction pH              | -0.0073  | 0.6185  | -0.0360 | 0.0214 |
| Neutrophil segments<br>(% WBC) | -0.0072  | 0.6205  | -0.0358 | 0.0214 |
| Total neutrophils (%<br>WBC)   | -0.0072  | 0.6205  | -0.0358 | 0.0214 |
| Absolute reticulocytes         | 0.0069   | 0.6408  | -0.0222 | 0.0361 |
| Neutrophils                    | 0.0068   | 0.6483  | -0.0226 | 0.0363 |
| Absolute eosinophils           | -0.0064  | 0.6635  | -0.0352 | 0.0224 |
| Calcium                        | 0.0062   | 0.6691  | -0.0224 | 0.0348 |
| Vitamin D                      | 0.0057   | 0.7024  | -0.0237 | 0.0352 |
| Lymphocytes (% WBC)            | 0.0057   | 0.6944  | -0.0229 | 0.0343 |
| Reticulocytes (% RBC)          | 0.0057   | 0.7017  | -0.0235 | 0.0349 |
| Triglycerides                  | 0.0055   | 0.7075  | -0.0233 | 0.0343 |
| Eosinophils (% WBC)            | -0.0047  | 0.7449  | -0.0333 | 0.0238 |
| Hemoglobin                     | -0.0047  | 0.7481  | -0.0334 | 0.0240 |
| Cholesterol                    | -0.0033  | 0.8231  | -0.0319 | 0.0254 |
| Urine specific gravity         | -0.0029  | 0.8465  | -0.0321 | 0.0263 |
| Neutrophil lymphocyte<br>ratio | -0.0009  | 0.9488  | -0.0295 | 0.0276 |
| Creatinine (urine)             | 0.0006   | 0.9663  | -0.0285 | 0.0298 |
| Hematocrit                     | 0.0000   | 0.9974  | -0.0286 | 0.0287 |

1  
2  
3 LASSO regression model 5 comprised age, sex, age by sex interaction, race, ethnicity, socioeconomic status, health behaviors,  
4 medical conditions (except mental health disorder diagnoses or disorders directly related to mental health or depression), symptoms  
5 (except those that are directly related to mental health or depression), allergies, and physical function. The LASSO-predicted value  
6 was used to estimate a covariate-adjusted effect for all other candidate variables shown.

7 ALT, alanine aminotransferase; AST, aspartate aminotransferase; GFR, glomerular filtration rate; GERD, gastroesophageal reflux  
8 disease; HbA1c, hemoglobin A1c; HDL, high density lipoprotein; LASSO, least absolute shrinkage and selection operator; LDL, low  
9 density lipoprotein; MCH, mean corpuscular hemoglobin; MCHC, mean corpuscular hemoglobin concentration; MCV, mean  
10 corpuscular volume; MDRD, modification of diet in renal disease; RBC, red blood cells; TSH, thyroid-stimulating hormone; WBC,  
11 white blood cells.  
12  
13  
14  
15  
16  
17  
18  
19  
20  
21  
22  
23  
24  
25  
26  
27  
28  
29  
30  
31  
32  
33  
34  
35  
36  
37  
38  
39  
40  
41  
42  
43  
44  
45  
46  
47  
48  
49  
50  
51  
52  
53  
54  
55  
56  
57  
58  
59  
60

### eFigure 1. Distribution of PHQ-9 Score Across Risk Groups by Asthma

Risk groups were created based on the LASSO-predicted value using LASSO Model 1 (age, sex, age x sex interaction) and Model 2 (race, ethnicity, socioeconomic-related variables and health behaviors). "High risk" was defined as the top 50% of the predicted value, while "low risk" was defined as the bottom 50% of the predicted value.

LASSO, least absolute shrinkage and selection operator; PHQ-9, Patient Health Questionnaire-9.

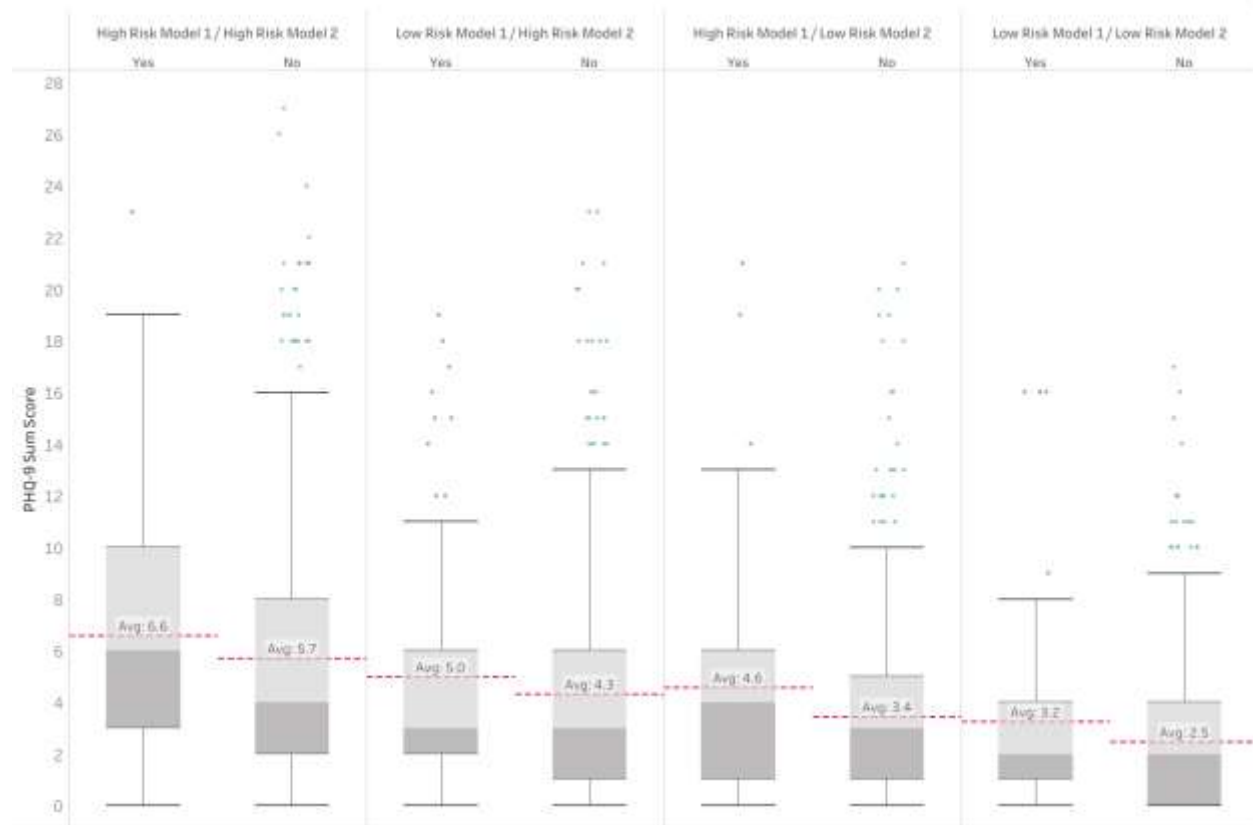

**eFigure 2. Distribution of PHQ-9 Score Across Risk Groups by Backache**

Risk groups were created based on the LASSO-predicted value using LASSO Model 1 (age, sex, age x sex interaction) and Model 2 (race, ethnicity, socioeconomic-related variables and health behaviors). “High risk” was defined as the top 50% of the predicted value, while “low risk” was defined as the bottom 50% of the predicted value.

LASSO, least absolute shrinkage and selection operator; PHQ-9, Patient Health Questionnaire-9.

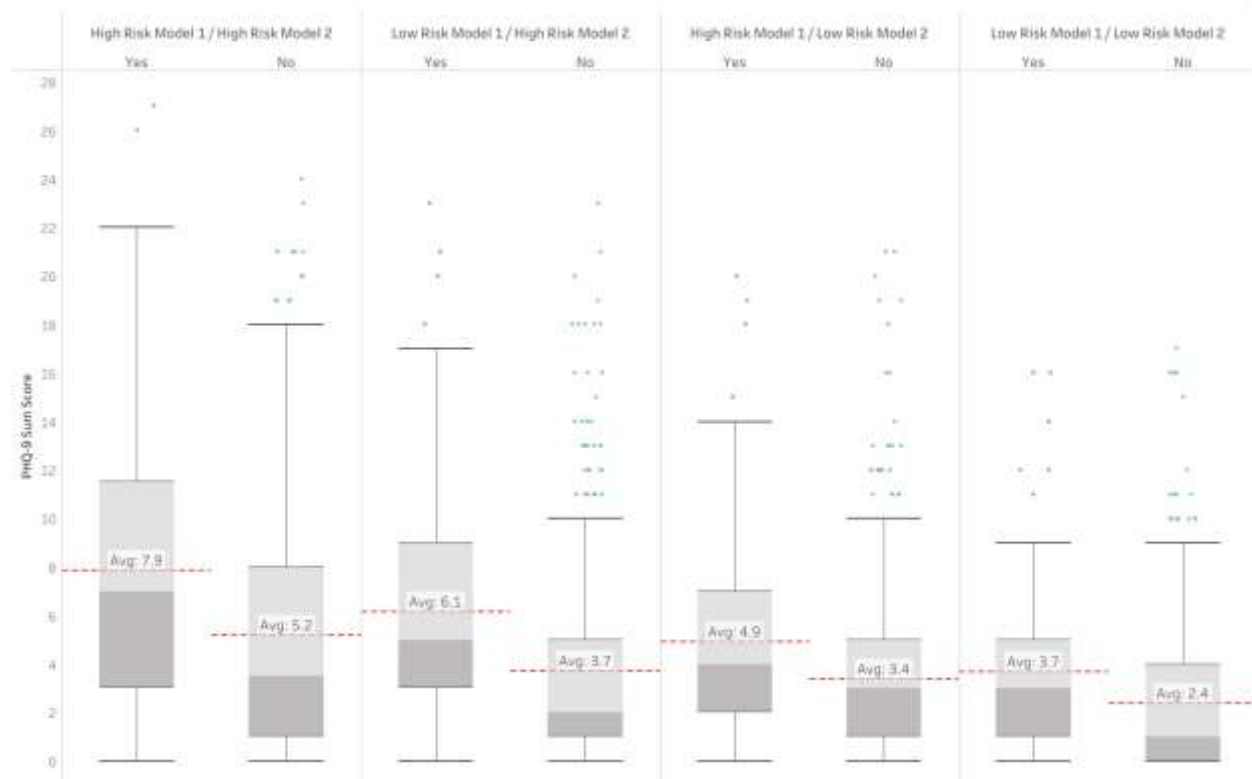

**eFigure 3. Distribution of PHQ-9 Score Across Risk Groups by Memory Change**  
Risk groups were created based on the LASSO-predicted value using LASSO Model 1 (age, sex, age x sex interaction) and Model 2 (race, ethnicity, socioeconomic-related variables and health behaviors). “High risk” was defined as the top 50% of the predicted value, while “low risk” was defined as the bottom 50% of the predicted value. LASSO, least absolute shrinkage and selection operator; PHQ-9, Patient Health Questionnaire-9.

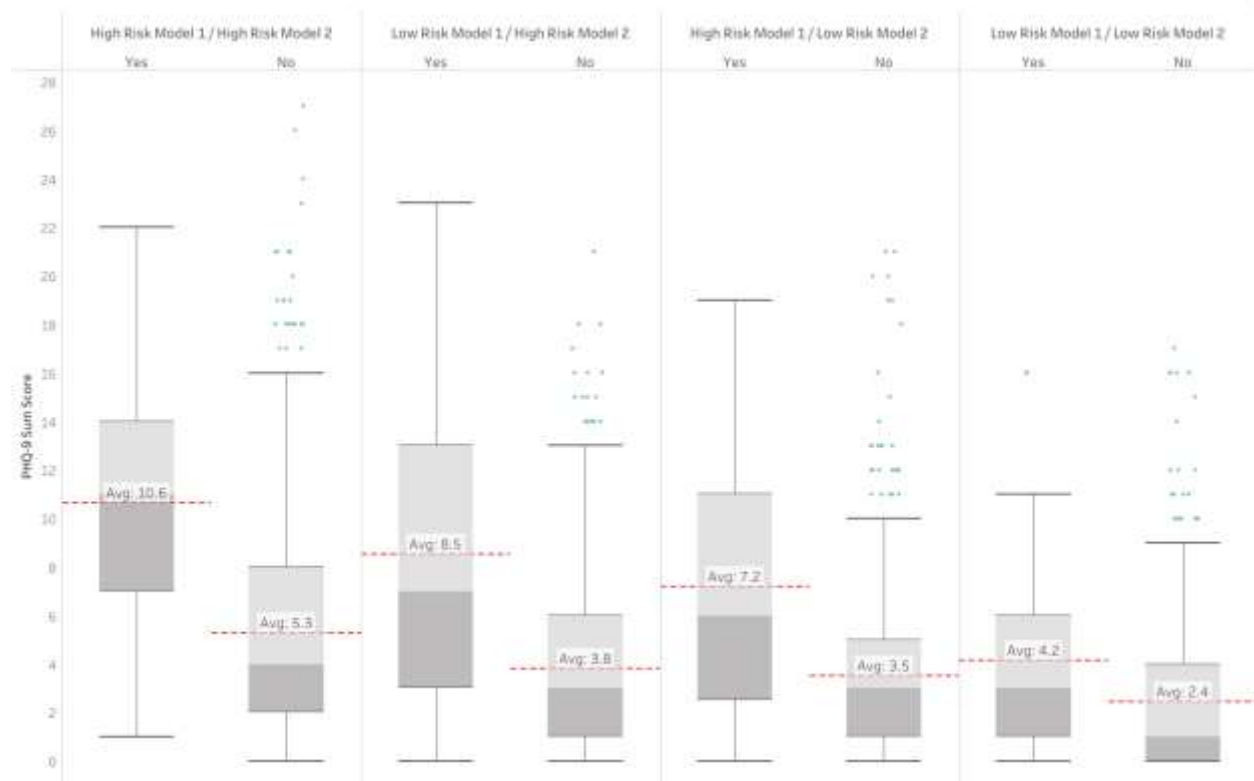



**eFigure 4. Distribution of PHQ-9 Score Across Risk Groups by Body Image Concerns**

Risk groups were created based on the LASSO-predicted value using LASSO Model 1 (age, sex, age x sex interaction) and Model 2 (race, ethnicity, socioeconomic-related variables and health behaviors). “High risk” was defined as the top 50% of the predicted value, while “low risk” was defined as the bottom 50% of the predicted value. LASSO, least absolute shrinkage and selection operator; PHQ-9, Patient Health Questionnaire-9.

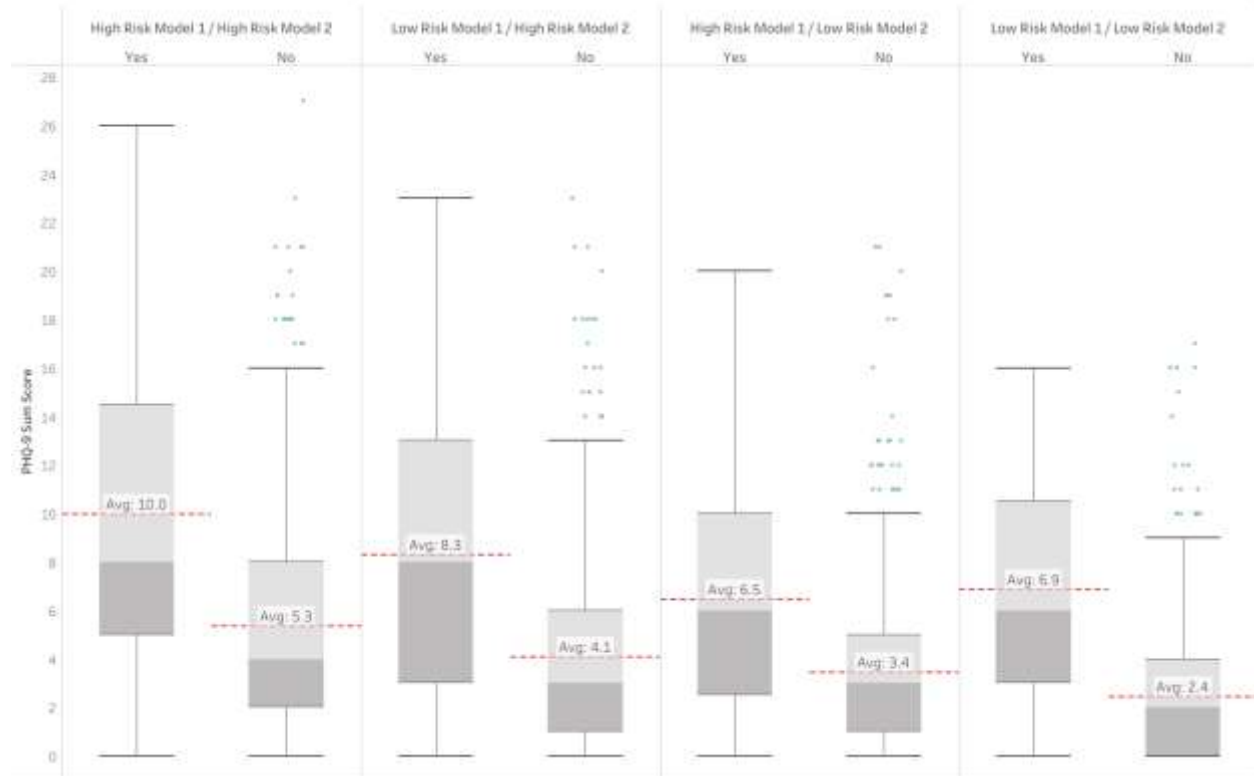

### eFigure 5. Distribution of PHQ-9 Score Across Risk Groups by Sleep Apnea

Risk groups were created based on the LASSO-predicted value using LASSO Model 1 (age, sex, age x sex interaction) and Model 2 (race, ethnicity, socioeconomic-related variables and health behaviors). "High risk" was defined as the top 50% of the predicted value, while "low risk" was defined as the bottom 50% of the predicted value.

LASSO, least absolute shrinkage and selection operator; PHQ-9, Patient Health Questionnaire-9.

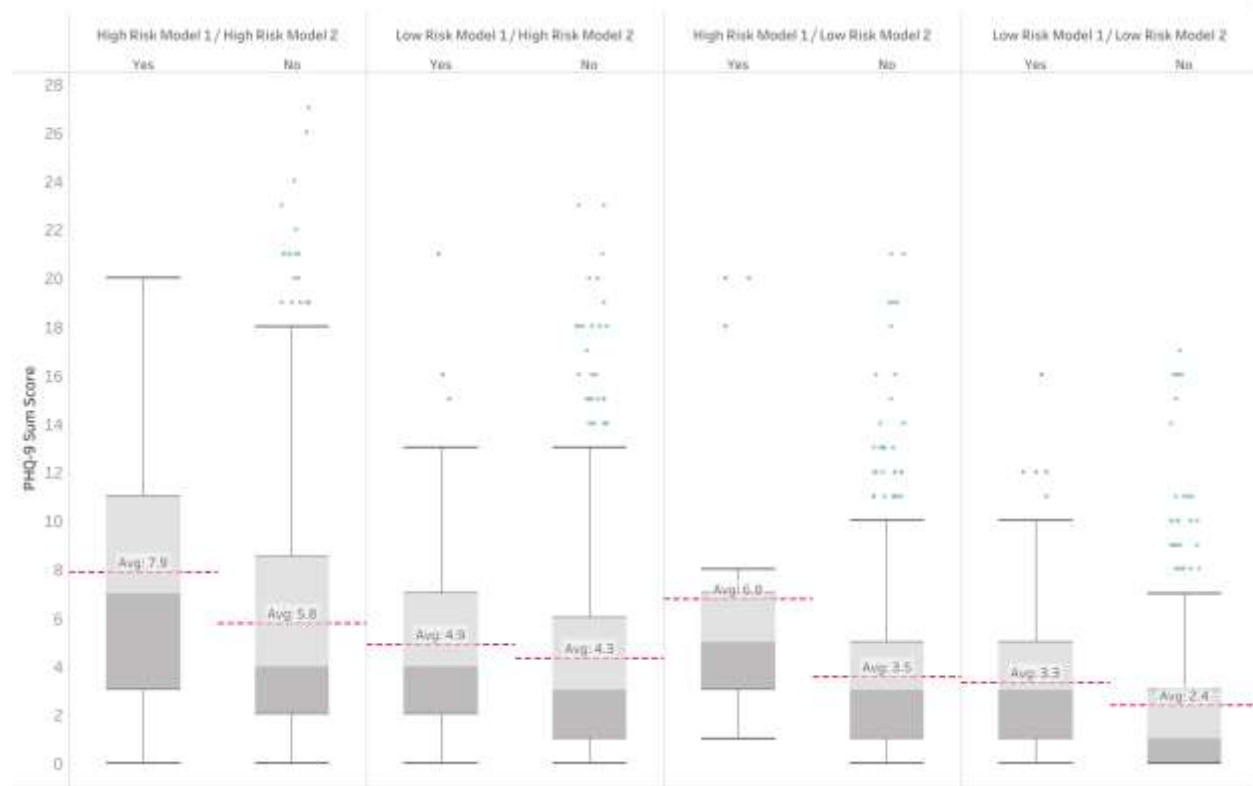

Only

## STROBE Statement—checklist of items that should be included in reports of observational studies

|                              | Item No | Recommendation                                                                                                                                                                                                                                                                                                                                                                                                                                                         | Page No |
|------------------------------|---------|------------------------------------------------------------------------------------------------------------------------------------------------------------------------------------------------------------------------------------------------------------------------------------------------------------------------------------------------------------------------------------------------------------------------------------------------------------------------|---------|
| <b>Title and abstract</b>    | 1       | (a) Indicate the study's design with a commonly used term in the title or the abstract                                                                                                                                                                                                                                                                                                                                                                                 | 1-4     |
|                              |         | (b) Provide in the abstract an informative and balanced summary of what was done and what was found                                                                                                                                                                                                                                                                                                                                                                    | 1-4     |
| <b>Introduction</b>          |         |                                                                                                                                                                                                                                                                                                                                                                                                                                                                        |         |
| Background/rationale         | 2       | Explain the scientific background and rationale for the investigation being reported                                                                                                                                                                                                                                                                                                                                                                                   | 6       |
| Objectives                   | 3       | State specific objectives, including any prespecified hypotheses                                                                                                                                                                                                                                                                                                                                                                                                       | 6       |
| <b>Methods</b>               |         |                                                                                                                                                                                                                                                                                                                                                                                                                                                                        |         |
| Study design                 | 4       | Present key elements of study design early in the paper                                                                                                                                                                                                                                                                                                                                                                                                                | 7       |
| Setting                      | 5       | Describe the setting, locations, and relevant dates, including periods of recruitment, exposure, follow-up, and data collection                                                                                                                                                                                                                                                                                                                                        | 7-11    |
| Participants                 | 6       | (a) <i>Cohort study</i> —Give the eligibility criteria, and the sources and methods of selection of participants. Describe methods of follow-up<br><i>Case-control study</i> —Give the eligibility criteria, and the sources and methods of case ascertainment and control selection. Give the rationale for the choice of cases and controls<br><i>Cross-sectional study</i> —Give the eligibility criteria, and the sources and methods of selection of participants | 7-11    |
|                              |         | (b) <i>Cohort study</i> —For matched studies, give matching criteria and number of exposed and unexposed<br><i>Case-control study</i> —For matched studies, give matching criteria and the number of controls per case                                                                                                                                                                                                                                                 | 7-11    |
| Variables                    | 7       | Clearly define all outcomes, exposures, predictors, potential confounders, and effect modifiers. Give diagnostic criteria, if applicable                                                                                                                                                                                                                                                                                                                               | 7-11    |
| Data sources/<br>measurement | 8*      | For each variable of interest, give sources of data and details of methods of assessment (measurement). Describe comparability of assessment methods if there is more than one group                                                                                                                                                                                                                                                                                   | 7-11    |
| Bias                         | 9       | Describe any efforts to address potential sources of bias                                                                                                                                                                                                                                                                                                                                                                                                              | 7-11    |
| Study size                   | 10      | Explain how the study size was arrived at                                                                                                                                                                                                                                                                                                                                                                                                                              | 7-11    |
| Quantitative variables       | 11      | Explain how quantitative variables were handled in the analyses. If applicable, describe which groupings were chosen and why                                                                                                                                                                                                                                                                                                                                           | 7-11    |
| Statistical methods          | 12      | (a) Describe all statistical methods, including those used to control for confounding                                                                                                                                                                                                                                                                                                                                                                                  | 7-11    |
|                              |         | (b) Describe any methods used to examine subgroups and interactions                                                                                                                                                                                                                                                                                                                                                                                                    | 7-11    |
|                              |         | (c) Explain how missing data were addressed                                                                                                                                                                                                                                                                                                                                                                                                                            | 7-11    |
|                              |         | (d) <i>Cohort study</i> —If applicable, explain how loss to follow-up was addressed<br><i>Case-control study</i> —If applicable, explain how matching of cases and controls was addressed<br><i>Cross-sectional study</i> —If applicable, describe analytical methods taking account of sampling strategy                                                                                                                                                              | 7-11    |
|                              |         | (e) Describe any sensitivity analyses                                                                                                                                                                                                                                                                                                                                                                                                                                  | n/a     |

Continued on next page

1  
2  
3  
4  
5  
6  
7  
8  
9  
10  
11  
12  
13  
14  
15  
16  
17  
18  
19  
20  
21  
22  
23  
24  
25  
26  
27  
28  
29  
30  
31  
32  
33  
34  
35  
36  
37  
38  
39  
40  
41  
42  
43  
44  
45  
46  
47  
48  
49  
50  
51  
52  
53  
54  
55  
56  
57  
58  
59  
60

| <b>Results</b>           |     |                                                                                                                                                                                                              |       |
|--------------------------|-----|--------------------------------------------------------------------------------------------------------------------------------------------------------------------------------------------------------------|-------|
| Participants             | 13* | (a) Report numbers of individuals at each stage of study—eg numbers potentially eligible, examined for eligibility, confirmed eligible, included in the study, completing follow-up, and analysed            | 11-13 |
|                          |     | (b) Give reasons for non-participation at each stage                                                                                                                                                         | 11-13 |
|                          |     | (c) Consider use of a flow diagram                                                                                                                                                                           | n/a   |
| Descriptive data         | 14* | (a) Give characteristics of study participants (eg demographic, clinical, social) and information on exposures and potential confounders                                                                     | 11-13 |
|                          |     | (b) Indicate number of participants with missing data for each variable of interest                                                                                                                          | 11-13 |
|                          |     | (c) <i>Cohort study</i> —Summarise follow-up time (eg, average and total amount)                                                                                                                             | 11-13 |
| Outcome data             | 15* | <i>Cohort study</i> —Report numbers of outcome events or summary measures over time                                                                                                                          | 11-13 |
|                          |     | <i>Case-control study</i> —Report numbers in each exposure category, or summary measures of exposure                                                                                                         | n/a   |
|                          |     | <i>Cross-sectional study</i> —Report numbers of outcome events or summary measures                                                                                                                           | n/a   |
| Main results             | 16  | (a) Give unadjusted estimates and, if applicable, confounder-adjusted estimates and their precision (eg, 95% confidence interval). Make clear which confounders were adjusted for and why they were included | 11-13 |
|                          |     | (b) Report category boundaries when continuous variables were categorized                                                                                                                                    | 11-13 |
|                          |     | (c) If relevant, consider translating estimates of relative risk into absolute risk for a meaningful time period                                                                                             | 11-13 |
| Other analyses           | 17  | Report other analyses done—eg analyses of subgroups and interactions, and sensitivity analyses                                                                                                               | n/a   |
| <b>Discussion</b>        |     |                                                                                                                                                                                                              |       |
| Key results              | 18  | Summarise key results with reference to study objectives                                                                                                                                                     | 13-15 |
| Limitations              | 19  | Discuss limitations of the study, taking into account sources of potential bias or imprecision. Discuss both direction and magnitude of any potential bias                                                   | 15    |
| Interpretation           | 20  | Give a cautious overall interpretation of results considering objectives, limitations, multiplicity of analyses, results from similar studies, and other relevant evidence                                   | 15,16 |
| Generalisability         | 21  | Discuss the generalisability (external validity) of the study results                                                                                                                                        | 15,16 |
| <b>Other information</b> |     |                                                                                                                                                                                                              |       |
| Funding                  | 22  | Give the source of funding and the role of the funders for the present study and, if applicable, for the original study on which the present article is based                                                | 19    |

\*Give information separately for cases and controls in case-control studies and, if applicable, for exposed and unexposed groups in cohort and cross-sectional studies.

**Note:** An Explanation and Elaboration article discusses each checklist item and gives methodological background and published examples of transparent reporting. The STROBE checklist is best used in conjunction with this article (freely available on the Web sites of PLoS Medicine at <http://www.plosmedicine.org/>, Annals of Internal Medicine at <http://www.annals.org/>, and Epidemiology at <http://www.epidem.com/>). Information on the STROBE Initiative is available at [www.strobe-statement.org](http://www.strobe-statement.org).
